# Supplementary material for: Construction of an ultrahigh-density linkage map and graphical representation of the arrangement of transcriptome-based unigene markers on the chromosomes of Allium cepa L.
Source: Research Square preprint supplement (doi:10.21203/rs.3.rs-114354/v1), 2020-12-01
Supplement: Supplementary file 1 [file 62902fcf0f9fca2a5672e676.xlsx]

## Sheet: all_chr
chr_No	genotype block	unigene_code	position	DHA	DHC	reliability _code	2	7	9	34	48	56	59	68	91	95	98	101	108	110	112	113	119	121	138	143	146	151	153	159	162	174	182	183	185	8	12	15	25	26	28	29	33	35	36	41	46	47	52
chr1	AC1B0010	Unigene13637	1265	T	C	S	h	h	c	a	h	a	c	c	h	h	h	a	h	a	h	a	h	h	c	a	h	a	c	h	h	a	c	a	h	a	c	h	h	h	c	a	h	h	c	c	h	h	h
chr1	AC1B0020	Unigene11268	100	C	T	S	h	h	c	a	h	a	c	c	h	h	h	a	h	a	h	a	h	h	c	a	h	a	c	h	h	a	c	a	h	a	c	h	h	h	c	a	h	h	c	c	h	h	h
chr1	AC1B0020	Unigene14042	634	G	A	S	h	h	c	a	h	a	c	c	h	h	h	a	h	a	h	a	h	h	c	a	h	a	c	h	h	a	c	a	h	a	c	h	h	h	c	a	h	h	c	c	h	h	h
chr1	AC1B0020	Unigene213	38	A	G	S	h	h	c	a	h	a	c	c	h	h	h	a	h	a	h	a	h	h	c	a	h	a	c	h	h	a	c	a	h	a	c	h	h	h	c	a	h	h	c	c	h	h	h
chr1	AC1B0020	Unigene9773	137	C	T	S	h	h	c	a	h	a	c	c	h	h	h	a	h	a	h	a	h	h	c	a	h	a	c	h	h	a	c	a	h	a	c	h	h	h	c	a	h	h	c	c	h	h	h
chr1	AC1B0030	Unigene23470	800	A	T	S	h	h	c	a	h	a	c	c	h	h	h	a	h	a	h	a	a	h	c	h	h	a	c	h	h	a	c	a	h	a	c	h	h	h	c	a	h	h	c	c	h	h	h
chr1	AC1B0040	Unigene6024	308	A	G	S	h	h	c	a	h	a	c	c	h	h	h	a	h	h	h	a	a	h	c	h	h	a	c	h	h	a	c	a	h	a	c	h	h	h	c	a	h	h	c	c	h	h	h
chr1	AC1B0040	CL2027.Contig4	194	A	G	S	h	h	c	a	h	a	c	c	h	h	h	a	h	h	h	a	a	h	c	h	h	a	c	h	h	a	c	a	h	a	c	h	h	h	c	a	h	h	c	c	h	h	h
chr1	AC1B0040	Unigene6616	270	A	G	S	h	h	c	a	h	a	c	c	h	h	h	a	h	h	h	a	a	h	c	h	h	a	c	h	h	a	c	a	h	a	c	h	h	h	c	a	h	h	c	c	h	h	h
chr1	AC1B0050	Unigene28097	56	T	C	S	h	h	c	a	h	a	c	c	h	h	h	a	h	h	h	a	a	h	c	h	h	a	c	h	h	a	c	a	h	a	h	h	h	h	c	h	h	h	c	c	h	h	h
chr1	AC1B0060	CL5748.Contig2	363	C	G	S	h	h	c	a	h	a	c	c	h	h	h	a	h	h	h	a	a	h	c	h	h	a	c	h	h	a	c	a	h	a	h	h	h	h	c	h	c	h	c	c	h	h	h
chr1	AC1B0060	Unigene29064	288	T	C	S	h	h	c	a	h	a	c	c	h	h	h	a	h	h	h	a	a	h	c	h	h	a	c	h	h	a	c	a	h	a	h	h	h	h	c	h	c	h	c	c	h	h	h
chr1	AC1B0060	Unigene6030	208	T	C	S	h	h	c	a	h	a	c	c	h	h	h	a	h	h	h	a	a	h	c	h	h	a	c	h	h	a	c	a	h	a	h	h	h	h	c	h	c	h	c	c	h	h	h
chr1	AC1B0070	CL2372.Contig1	176	G	A	S	h	h	c	a	h	a	c	c	h	h	c	a	h	h	h	a	a	h	c	h	h	a	c	h	h	a	c	a	h	a	h	h	h	h	c	h	c	h	c	c	h	h	h
chr1	AC1B0070	CL2711.Contig1	407	C	A	S	h	h	c	a	h	a	c	c	h	h	c	a	h	h	h	a	a	h	c	h	h	a	c	h	h	a	c	a	h	a	h	h	h	h	c	h	c	h	c	c	h	h	h
chr1	AC1B0070	Unigene11121	105	G	A	S	h	h	c	a	h	a	c	c	h	h	c	a	h	h	h	a	a	h	c	h	h	a	c	h	h	a	c	a	h	a	h	h	h	h	c	h	c	h	c	c	h	h	h
chr1	AC1B0070	Unigene12066	1871	A	T	S	h	h	c	a	h	a	c	c	h	h	c	a	h	h	h	a	a	h	c	h	h	a	c	h	h	a	c	a	h	a	h	h	h	h	c	h	c	h	c	c	h	h	h
chr1	AC1B0070	Unigene21836	116	T	C	S	h	h	c	a	h	a	c	c	h	h	c	a	h	h	h	a	a	h	c	h	h	a	c	h	h	a	c	a	h	a	h	h	h	h	c	h	c	h	c	c	h	h	h
chr1	AC1B0070	Unigene28000	147	G	C	S	h	h	c	a	h	a	c	c	h	h	c	a	h	h	h	a	a	h	c	h	h	a	c	h	h	a	c	a	h	a	h	h	h	h	c	h	c	h	c	c	h	h	h
chr1	AC1B0070	Unigene28045	561	G	A	S	h	h	c	a	h	a	c	c	h	h	c	a	h	h	h	a	a	h	c	h	h	a	c	h	h	a	c	a	h	a	h	h	h	h	c	h	c	h	c	c	h	h	h
chr1	AC1B0070	Unigene29157	233	G	A	S	h	h	c	a	h	a	c	c	h	h	c	a	h	h	h	a	a	h	c	h	h	a	c	h	h	a	c	a	h	a	h	h	h	h	c	h	c	h	c	c	h	h	h
chr1	AC1B0070	Unigene30098	298	C	G	S	h	h	c	a	h	a	c	c	h	h	c	a	h	h	h	a	a	h	c	h	h	a	c	h	h	a	c	a	h	a	h	h	h	h	c	h	c	h	c	c	h	h	h
chr1	AC1B0080	Unigene21043	655	G	A	S	h	h	c	a	h	a	c	c	h	h	c	a	h	h	h	a	a	h	c	h	c	a	c	h	h	a	c	a	h	a	h	h	h	h	c	h	c	h	c	c	h	h	h
chr1	AC1B0090	Unigene23995	482	T	C	S	h	h	c	a	h	a	c	c	h	h	c	a	h	h	h	a	a	h	c	h	c	a	c	h	h	a	c	a	h	a	h	h	c	h	c	h	c	h	c	c	h	h	h
chr1	AC1B0100	Unigene3366	68	C	T	S	h	h	c	a	h	a	c	c	h	h	c	a	h	h	h	a	a	h	c	a	c	a	h	h	h	a	h	h	h	a	h	h	c	h	c	h	h	h	c	c	h	h	h
chr1	AC1B0100	CL4655.Contig1	555	C	T	S	h	h	c	a	h	a	c	c	h	h	c	a	h	h	h	a	a	h	c	a	c	a	h	h	h	a	h	h	h	a	h	h	c	h	c	h	h	h	c	c	h	h	h
chr1	AC1B0100	Unigene12419	259	T	C	S	h	h	c	a	h	a	c	c	h	h	c	a	h	h	h	a	a	h	c	a	c	a	h	h	h	a	h	h	h	a	h	h	c	h	c	h	h	h	c	c	h	h	h
chr1	AC1B0100	Unigene24402	381	T	A	S	h	h	c	a	h	a	c	c	h	h	c	a	h	h	h	a	a	h	c	a	c	a	h	h	h	a	c	h	h	a	h	h	c	h	c	h	h	h	c	c	h	h	h
chr1	AC1B0100	Unigene8471	250	C	T	S	h	h	c	a	h	a	c	c	h	h	c	a	h	h	h	a	a	h	c	a	c	a	h	h	h	a	h	h	h	a	h	h	c	h	c	h	h	h	c	c	h	h	h
chr1	AC1B0110	Unigene12524	23	T	C	S	h	h	c	a	h	a	c	c	h	h	c	a	h	h	h	a	a	h	c	a	c	a	h	h	h	a	h	h	h	a	h	h	c	h	c	h	h	h	c	c	h	h	h
chr1	AC1B0110	Unigene8582	149	A	G	S	h	h	c	a	h	a	c	c	h	h	c	a	h	h	h	a	a	h	c	a	c	a	h	h	h	a	h	h	h	a	h	h	c	h	c	h	h	h	c	c	h	h	h
chr1	AC1B0110	Unigene9309	45	A	G	S	h	h	c	a	h	a	c	c	h	h	c	a	h	h	h	a	a	h	c	a	c	a	h	h	h	a	h	h	h	a	h	h	c	h	c	h	h	h	c	c	h	h	h
chr1	AC1B0120	CL2229.Contig1	448	C	T	S	h	h	c	a	h	a	c	c	h	h	c	a	h	h	h	a	a	h	c	a	c	a	h	h	h	a	h	h	h	a	h	h	c	h	c	h	h	h	c	c	h	h	h
chr1	AC1B0120	CL2229.Contig2	213	C	T	S	h	h	c	a	h	a	c	c	h	h	c	a	h	h	h	a	a	h	c	a	c	a	h	h	h	a	h	h	h	a	h	h	c	h	c	h	h	h	c	c	h	h	h
chr1	AC1B0120	CL2322.Contig2	399	T	C	S	h	h	c	a	h	a	c	c	h	h	c	a	h	h	h	a	a	h	c	a	c	a	h	h	h	a	h	h	h	a	h	h	c	h	c	h	h	h	c	c	h	h	h
chr1	AC1B0120	CL2869.Contig1	124	T	A	S	h	h	c	a	h	a	c	c	h	h	c	a	h	h	h	a	a	h	c	a	c	a	h	h	h	a	h	h	h	a	h	h	c	h	c	h	h	h	c	c	h	h	h
chr1	AC1B0120	CL780.Contig1	351	G	A	S	h	h	c	a	h	a	c	c	h	h	c	a	h	h	h	a	a	h	c	a	c	a	h	h	h	a	h	h	h	a	h	h	c	h	c	h	h	h	c	c	h	h	h
chr1	AC1B0120	CL871.Contig3	913	C	G	S	h	h	c	a	h	a	c	c	h	h	c	a	h	h	h	a	a	h	c	a	c	a	h	h	h	a	h	h	h	a	h	h	c	h	c	h	h	h	c	c	h	h	h
chr1	AC1B0120	Unigene10065	40	G	A	S	h	h	c	a	h	a	c	c	h	h	c	a	h	h	h	a	a	h	c	a	c	a	h	h	h	a	h	h	h	a	h	h	c	h	c	h	h	h	c	c	h	h	h
chr1	AC1B0120	Unigene11321	272	A	G	S	h	h	c	a	h	a	c	c	h	h	c	a	h	h	h	a	a	h	c	a	c	a	h	h	h	a	h	h	h	a	h	h	c	h	c	h	h	h	c	c	h	h	h
chr1	AC1B0120	Unigene11486	397	T	C	S	h	h	c	a	h	a	c	c	h	h	c	a	h	h	h	a	a	h	c	a	c	a	h	h	h	a	h	h	h	a	h	h	c	h	c	h	h	h	c	c	h	h	h
chr1	AC1B0120	Unigene12675	42	G	A	S	h	h	c	a	h	a	c	c	h	h	c	a	h	h	h	a	a	h	c	a	c	a	h	h	h	a	h	h	h	a	h	h	c	h	c	h	h	h	c	c	h	h	h
chr1	AC1B0120	Unigene21192	30	G	A	S	h	h	c	a	h	a	c	c	h	h	c	a	h	h	h	a	a	h	c	a	c	a	h	h	h	a	h	h	h	a	h	h	c	h	c	h	h	h	c	c	h	h	h
chr1	AC1B0120	Unigene21601	27	T	C	S	h	h	c	a	h	a	c	c	h	h	c	a	h	h	h	a	a	h	c	a	c	a	h	h	h	a	h	h	h	a	h	h	c	h	c	h	h	h	c	c	h	h	h
chr1	AC1B0120	Unigene27215	999	G	A	S	h	h	c	a	h	a	c	c	h	h	c	a	h	h	h	a	a	h	c	a	c	a	h	h	h	a	h	h	h	a	h	h	c	h	c	h	h	h	c	c	h	h	h
chr1	AC1B0120	Unigene28277	131	T	G	S	h	h	c	a	h	a	c	c	h	h	c	a	h	h	h	a	a	h	c	a	c	a	h	h	h	a	h	h	h	a	h	h	c	h	c	h	h	h	c	c	h	h	h
chr1	AC1B0120	Unigene28441	551	A	G	S	h	h	c	a	h	a	c	c	h	h	c	a	h	h	h	a	a	h	c	a	c	a	h	h	h	a	h	h	h	a	h	h	c	h	c	h	h	h	c	c	h	h	h
chr1	AC1B0120	Unigene29120	209	G	A	S	h	h	c	a	h	a	c	c	h	h	c	a	h	h	h	a	a	h	c	a	c	a	h	h	h	a	h	h	h	a	h	h	c	h	c	h	h	h	c	c	h	h	h
chr1	AC1B0120	Unigene8838	907	G	A	S	h	h	c	a	h	a	c	c	h	h	c	a	h	h	h	a	a	h	c	a	c	a	h	h	h	a	h	h	h	a	h	h	c	h	c	h	h	h	c	c	h	h	h
chr1	AC1B0130	Unigene24475	1542	T	A	S	h	h	c	a	h	a	c	c	h	h	c	a	h	h	h	a	a	h	c	a	c	a	h	h	h	a	h	h	h	a	h	h	c	h	c	h	h	h	c	c	h	h	h
chr1	AC1B0130	Unigene27556	133	A	G	S	h	h	c	a	h	a	c	c	h	h	c	a	h	h	h	a	a	h	c	a	c	a	h	h	h	a	h	h	h	a	h	h	c	h	c	h	h	h	c	c	h	h	h
chr1	AC1B0140	CL3179.Contig1	183	G	T	S	h	h	c	a	h	a	c	c	h	h	c	a	h	h	h	a	a	h	h	a	c	a	h	h	h	a	h	h	h	a	h	h	c	h	c	h	h	h	c	c	h	h	h
chr1	AC1B0140	Unigene24702	427	C	T	S	h	h	c	a	h	a	c	c	h	h	c	a	h	h	h	a	a	h	h	a	c	a	h	h	h	a	h	h	h	a	h	h	c	h	c	h	h	h	c	c	h	h	h
chr1	AC1B0140	Unigene24703	59	T	A	S	h	h	c	a	h	a	c	c	h	h	c	a	h	h	h	a	a	h	h	a	c	a	h	h	h	a	h	h	h	a	h	h	c	h	c	h	h	h	c	c	h	h	h
chr1	AC1B0140	Unigene24705	292	G	C	S	h	h	c	a	h	a	c	c	h	h	c	a	h	h	h	a	a	h	h	a	c	a	h	h	h	a	h	h	h	a	h	h	c	h	c	h	h	h	c	c	h	h	h
chr1	AC1B0150	CL1013.Contig1	136	G	A	S	h	h	c	a	h	a	c	c	h	h	c	a	h	h	h	a	a	h	h	a	c	a	h	h	h	a	h	h	h	a	h	h	c	h	c	h	h	h	c	c	h	h	h
chr1	AC1B0150	CL3804.Contig1	606	A	G	S	h	h	c	a	h	a	c	c	h	h	c	a	h	h	h	a	a	h	h	a	c	a	h	h	h	a	h	h	h	a	h	h	c	h	c	h	h	h	c	c	h	h	h
chr1	AC1B0150	Unigene11073	86	G	C	S	h	h	c	a	h	a	c	c	h	h	c	a	h	h	h	a	a	h	h	a	c	a	h	h	h	a	h	h	h	a	h	h	c	h	c	h	h	h	c	c	h	h	h
chr1	AC1B0150	Unigene21118	473	T	G	S	h	h	c	a	h	a	c	c	h	h	c	a	h	h	h	a	a	h	h	a	c	a	h	h	h	a	h	h	h	a	h	h	c	h	c	h	h	h	c	c	h	h	h
chr1	AC1B0150	Unigene27346	64	C	T	S	h	h	c	a	h	a	c	c	h	h	c	a	h	h	h	a	a	h	h	a	c	a	h	h	h	a	h	h	h	a	h	h	c	h	c	h	h	h	c	c	h	h	h
chr1	AC1B0150	Unigene28659	313	G	A	S	h	h	c	a	h	a	c	c	h	h	c	a	h	h	h	a	a	h	h	a	c	a	h	h	h	a	h	h	h	a	h	h	c	h	c	h	h	h	c	c	h	h	h
chr1	AC1B0160	Unigene29306	392	G	A	S	h	h	c	a	h	a	c	c	h	h	c	a	h	h	h	a	a	h	h	a	c	a	h	h	c	a	h	h	h	a	h	h	c	h	c	h	h	h	c	c	h	h	h
chr1	AC1B0170	Unigene29193	110	A	G	S	h	h	c	h	h	a	c	c	h	a	c	a	h	h	h	a	a	h	h	a	c	a	h	h	c	a	h	h	h	a	h	h	c	h	c	h	h	h	c	c	a	h	h
chr1	AC1B0180	CL3416.Contig2	74	C	T	S	h	h	c	h	h	a	c	c	h	a	c	a	h	h	h	a	a	h	h	a	c	a	h	h	c	a	h	h	a	a	h	h	c	h	c	h	h	h	c	c	a	h	h
chr1	AC1B0190	CL5155.Contig2	774	A	G	S	h	h	c	h	h	a	c	c	h	a	c	a	h	h	h	a	a	h	h	a	c	a	h	h	c	a	h	h	h	a	h	h	c	h	c	h	h	h	c	c	a	h	h
chr1	AC1B0200	Unigene13501	709	C	A	S	h	h	c	h	h	a	c	c	h	a	c	a	h	h	h	a	a	h	h	a	c	a	h	h	h	a	h	h	h	a	h	h	c	h	c	h	h	h	c	c	a	h	h
chr1	AC1B0200	Unigene13727	254	T	C	S	c	h	c	h	h	a	c	c	h	a	c	a	h	h	h	a	a	h	h	a	c	a	h	h	h	a	h	h	h	a	h	h	c	h	c	h	h	h	c	c	a	h	h
chr1	AC1B0200	Unigene21951	108	T	C	S	h	h	c	h	h	a	c	c	h	a	c	a	h	h	h	a	a	h	h	a	c	a	h	h	h	a	h	h	h	a	h	h	c	h	c	h	h	h	c	c	a	h	h
chr1	AC1B0200	Unigene4725	157	G	A	S	h	h	c	h	h	a	c	c	h	a	c	a	h	h	h	a	a	h	h	a	c	a	h	h	h	a	h	h	h	a	h	h	c	h	c	h	h	h	c	c	a	h	h
chr1	AC1B0210	CL1839.Contig3	1502	T	C	S	h	h	c	h	h	a	c	c	h	a	c	a	h	h	h	a	a	h	h	a	c	a	h	h	h	a	a	h	h	a	h	h	c	h	c	h	h	h	c	c	a	h	h
chr1	AC1B0210	CL3698.Contig1	260	T	C	S	h	h	c	h	h	a	c	c	h	a	c	a	h	h	h	a	a	h	h	a	c	a	h	h	h	a	a	h	h	a	h	h	c	h	c	h	h	h	c	c	a	h	h
chr1	AC1B0210	Unigene29806	46	T	C	S	h	h	c	h	h	a	c	c	h	a	c	a	h	h	h	a	a	h	h	a	c	a	h	h	h	a	a	h	h	a	h	h	c	h	c	h	h	h	c	c	a	h	h
chr1	AC1B0220	Unigene27436	147	T	C	S	h	h	c	h	h	a	c	c	h	a	c	a	h	h	h	a	a	h	h	a	c	a	a	h	h	a	a	h	h	a	h	h	c	h	c	h	h	h	c	c	a	h	h
chr1	AC1B0220	Unigene8586	216	A	C	S	h	h	c	h	h	a	c	c	h	a	c	a	h	h	h	a	a	h	h	a	c	a	a	h	h	a	a	h	h	a	h	h	c	h	c	h	h	h	c	c	a	h	h
chr1	AC1B0230	Unigene27170	622	G	A	S	h	h	c	h	h	a	c	c	h	a	c	a	h	h	h	a	a	h	h	a	c	a	a	h	h	a	a	h	h	a	h	h	c	h	c	h	h	h	c	c	a	h	h
chr1	AC1B0240	Unigene20351	97	G	T	S	h	h	c	h	h	a	c	c	h	a	c	a	h	h	h	a	a	h	h	a	c	a	a	h	h	a	a	h	h	a	h	h	c	h	c	h	h	h	c	c	a	h	h
chr1	AC1B0240	Unigene20353	147	T	C	S	h	h	c	h	h	a	c	c	h	a	c	a	h	h	h	a	a	h	h	a	c	a	a	h	h	a	a	h	h	a	h	h	c	h	c	h	h	h	c	c	a	h	h
chr1	AC1B0250	CL1615.Contig2	278	C	T	S	h	h	c	h	h	a	c	c	h	a	c	a	a	h	h	a	a	h	a	a	c	a	a	h	h	a	a	h	h	a	h	h	c	h	c	h	h	h	c	c	a	h	h
chr1	AC1B0250	Unigene12490	99	C	T	S	h	h	c	h	h	a	c	c	h	a	c	a	a	h	h	a	a	h	a	a	c	a	a	h	h	a	a	h	h	a	h	h	c	h	c	h	h	h	c	c	a	h	h
chr1	AC1B0250	Unigene13324	336	T	G	S	h	h	c	h	h	a	c	c	h	a	c	a	a	h	h	a	a	h	a	a	c	a	a	h	h	a	a	h	h	a	h	h	c	h	c	h	h	h	c	c	a	h	h
chr1	AC1B0250	Unigene27657	138	G	A	S	h	h	c	h	h	a	c	c	h	a	c	a	a	h	h	a	a	h	a	a	c	a	a	h	h	a	a	h	h	a	h	h	c	h	c	h	h	h	c	c	a	h	h
chr1	AC1B0250	Unigene27983	148	G	C	S	h	h	c	h	h	a	c	c	h	a	c	a	a	h	h	a	a	h	a	a	c	a	a	h	h	a	a	h	h	a	h	h	c	h	c	h	h	h	c	c	a	h	h
chr1	AC1B0250	Unigene8312	959	A	G	S	h	h	c	h	h	a	c	c	h	a	c	a	a	h	h	a	a	h	a	a	c	a	a	h	h	a	a	h	h	a	h	h	c	h	c	h	h	h	c	c	a	h	h
chr1	AC1B0260	CL2187.Contig2	1295	A	G	S	h	h	c	h	h	a	c	c	h	a	c	a	a	h	h	a	a	h	a	a	c	a	a	h	h	a	a	h	h	a	h	h	c	h	c	h	h	h	c	c	a	h	h
chr1	AC1B0260	CL4988.Contig2	894	A	T	S	h	h	c	h	h	a	c	c	h	a	c	a	a	h	h	a	a	h	a	a	c	a	a	h	h	a	a	h	h	a	h	h	c	h	c	h	h	h	c	c	a	h	h
chr1	AC1B0260	Unigene14019	241	T	C	S	h	h	c	h	h	a	c	c	h	a	c	a	a	h	h	a	a	h	a	a	c	a	a	h	h	a	a	h	h	a	h	h	c	h	c	h	h	h	c	c	a	h	h
chr1	AC1B0260	Unigene20236	771	C	A	S	h	h	c	h	h	a	c	c	h	a	c	a	a	h	h	a	a	h	a	a	c	a	a	h	h	a	a	h	h	a	h	h	c	h	c	h	h	h	c	c	a	h	h
chr1	AC1B0260	Unigene27453	751	T	C	S	h	h	c	h	h	a	c	c	h	a	c	a	a	h	h	a	a	h	a	a	c	a	a	h	h	a	a	h	h	a	h	h	c	h	c	h	h	h	c	c	a	h	h
chr1	AC1B0260	Unigene27533	22	T	C	S	h	h	c	h	h	a	c	c	h	a	c	a	a	h	h	a	a	h	a	a	c	a	a	h	h	a	a	h	h	a	h	h	c	h	c	h	h	h	c	c	a	h	h
chr1	AC1B0260	Unigene28029	127	G	A	S	h	h	c	h	h	a	c	c	h	a	c	a	a	h	h	a	a	h	a	a	c	a	a	h	h	a	a	h	h	a	h	h	c	h	c	h	h	h	c	c	a	h	h
chr1	AC1B0260	Unigene28982	263	A	G	S	h	h	c	h	h	a	c	c	h	a	c	a	a	h	h	a	a	h	a	a	c	a	a	h	h	a	a	h	h	a	h	h	c	h	c	h	h	h	c	c	a	h	h
chr1	AC1B0270	Unigene6104	251	T	C	S	h	h	c	h	h	a	c	c	h	a	h	a	a	h	h	a	a	h	a	a	c	a	a	h	h	a	a	h	h	a	h	h	c	h	c	h	h	h	c	c	a	a	h
chr1	AC1B0280	Unigene569	49	A	G	S	h	h	c	h	h	h	c	c	h	a	h	a	a	h	h	a	a	h	a	a	c	a	a	h	h	a	a	h	h	a	h	h	c	h	c	c	h	h	c	c	a	a	h
chr1	AC1B0290	Unigene11446	160	T	C	S	h	h	c	h	h	h	c	c	h	a	h	a	a	h	h	a	a	h	a	a	c	a	a	h	h	a	a	h	h	a	h	h	c	h	c	c	a	h	c	c	a	a	h
chr1	AC1B0290	Unigene23596	464	G	C	S	h	h	c	h	h	h	c	c	h	a	h	a	a	h	h	a	a	h	a	a	c	a	a	h	h	a	a	h	h	a	h	h	c	h	c	c	a	h	c	c	a	a	h
chr1	AC1B0290	Unigene27557	704	G	A	S	h	h	c	h	h	h	c	c	h	a	h	a	a	h	h	a	a	h	a	a	c	a	a	h	h	a	a	h	h	a	h	h	c	h	c	c	a	h	c	c	a	a	h
chr1	AC1B0290	Unigene7840	118	A	G	S	h	h	c	h	h	h	c	c	h	a	h	a	a	h	h	a	a	h	a	a	c	a	a	h	h	a	a	h	h	a	h	h	c	h	c	c	a	h	c	c	a	a	h
chr1	AC1B0300	CL903.Contig1	407	T	C	S	h	h	c	h	h	h	c	c	h	a	h	a	a	h	h	a	a	h	a	a	c	a	a	h	h	a	a	h	h	a	h	h	c	h	c	c	a	h	c	c	a	a	h
chr1	AC1B0300	Unigene12335	102	C	T	S	h	h	c	h	h	h	c	c	h	a	h	a	a	h	h	a	a	h	a	a	c	a	a	h	h	a	a	h	h	a	h	h	c	h	c	c	a	h	c	c	a	a	h
chr1	AC1B0300	Unigene27691	1607	C	T	S	h	h	c	h	h	h	c	c	h	a	h	a	a	h	h	a	a	h	a	a	c	a	a	h	h	a	a	h	h	a	h	h	c	h	c	c	a	h	c	c	a	a	h
chr1	AC1B0310	Unigene8679	135	C	T	S	h	h	c	h	h	h	c	c	a	a	h	a	a	c	h	a	a	h	a	a	c	a	a	h	h	a	a	h	h	a	h	h	c	h	c	c	a	c	c	c	a	a	h
chr1	AC1B0320	Unigene10025	74	C	T	S	h	h	c	h	h	h	c	c	h	a	h	h	a	c	h	a	a	h	a	a	c	a	a	h	h	a	a	h	h	a	h	h	c	h	c	c	a	c	c	c	a	a	h
chr1	AC1B0330	Unigene13944	1398	T	A	S	h	h	c	h	h	h	c	c	h	a	h	h	a	c	h	a	a	h	a	h	c	a	a	h	h	a	h	h	a	a	h	h	c	h	c	c	a	c	c	c	a	a	h
chr1	AC1B0330	Unigene28477	86	T	A	S	h	h	c	h	h	h	c	c	h	a	h	h	a	c	h	a	a	h	a	h	c	a	a	h	h	a	h	h	a	a	h	h	c	h	c	c	a	c	c	c	a	a	h
chr1	AC1B0340	CL6997.Contig1	130	C	T	S	h	h	c	h	h	h	c	c	h	a	h	h	a	c	h	a	a	h	a	h	c	a	a	h	h	a	h	h	a	a	h	h	c	h	c	c	a	c	c	c	a	a	h
chr1	AC1B0350	CL5087.Contig1	51	A	G	S	h	h	c	h	h	h	c	c	h	a	h	h	a	c	h	a	a	h	a	h	c	a	a	h	h	a	h	h	a	a	h	h	c	h	c	c	a	c	c	c	a	a	h
chr1	AC1B0350	Unigene19795	455	T	C	S	h	h	c	h	h	h	c	c	h	a	h	h	a	c	h	a	a	h	a	h	c	a	a	h	h	a	h	h	a	a	h	h	c	h	c	c	a	c	c	c	a	a	h
chr1	AC1B0360	Unigene12722	182	T	C	S	h	a	c	h	h	h	c	c	h	a	h	h	a	c	h	a	a	c	a	h	c	a	a	h	h	a	h	h	a	a	h	h	c	h	c	c	a	c	c	h	a	a	h
chr1	AC1B0370	CL1757.Contig2	166	C	T	S	h	a	c	h	h	h	c	c	h	a	h	h	a	c	h	h	a	c	a	h	c	a	a	h	h	a	h	h	a	a	h	h	c	h	h	c	a	c	c	h	a	a	h
chr1	AC1B0370	CL2111.Contig1	310	T	C	S	h	a	c	h	h	h	c	c	h	a	h	h	a	c	h	h	a	c	a	h	c	a	a	h	h	a	h	h	a	a	h	h	c	h	h	c	a	c	c	h	a	a	h
chr1	AC1B0370	CL469.Contig2	14	A	G	S	h	a	c	h	h	h	c	c	h	a	h	h	a	c	h	h	a	c	a	h	c	a	a	h	h	a	h	h	a	a	h	h	c	h	h	c	a	c	c	h	a	a	h
chr1	AC1B0370	CL825.Contig1	748	G	C	S	h	a	c	h	h	h	c	c	h	a	h	h	a	c	h	h	a	c	a	h	c	a	a	h	h	a	h	h	a	a	h	h	c	h	h	c	a	c	c	h	a	a	h
chr1	AC1B0370	Unigene27760	137	C	T	S	h	a	c	h	h	h	c	c	h	a	h	h	a	c	h	h	a	c	a	h	c	a	a	h	h	a	h	h	a	a	h	h	c	h	h	c	a	c	c	h	a	a	h
chr1	AC1B0370	Unigene28069	69	G	A	S	h	a	c	h	h	h	c	c	h	a	h	h	a	c	h	h	a	c	a	h	c	a	a	h	h	a	h	h	a	a	h	h	c	h	h	c	a	c	c	h	a	a	h
chr1	AC1B0380	Unigene22500	621	T	C	S	h	a	c	h	h	h	c	c	h	a	h	h	a	c	h	h	a	c	a	h	c	a	a	a	h	a	h	h	a	a	h	h	c	h	h	c	a	c	c	h	a	a	h
chr1	AC1B0390	Unigene8808	54	A	G	S	h	a	c	h	h	h	c	c	h	a	h	h	a	c	h	h	a	c	a	h	c	a	a	a	h	h	h	h	a	a	h	h	c	h	h	c	a	h	c	h	a	a	h
chr1	AC1B0400	CL4949.Contig2	200	C	T	S	h	a	c	h	h	h	c	c	h	a	h	h	a	c	h	h	a	c	a	h	c	a	a	a	h	h	h	h	a	a	h	h	c	h	h	c	a	h	h	h	a	a	h
chr1	AC1B0400	Unigene35371	200	C	T	S	h	a	c	h	h	h	c	c	h	a	h	h	a	c	h	h	a	c	a	h	c	a	a	a	h	h	h	h	a	a	h	h	c	h	h	c	a	h	h	h	a	a	h
chr1	AC1B0410	Unigene11955	251	T	A	S	c	a	c	h	h	h	c	c	h	a	c	h	a	c	h	h	a	c	a	h	c	a	a	a	h	h	h	h	a	a	h	h	c	h	h	c	a	h	h	h	a	a	h
chr1	AC1B0410	Unigene18759	489	C	T	S	c	a	c	h	h	h	c	c	h	a	h	h	a	c	h	h	a	c	a	h	c	a	a	a	h	h	h	h	a	a	h	h	c	h	h	c	a	h	h	h	a	a	h
chr1	AC1B0420	CL239.Contig1	483	A	G	S	c	a	c	h	h	h	c	c	h	a	h	h	a	c	h	h	a	c	a	h	c	a	a	a	h	h	h	h	a	a	h	h	c	h	h	c	a	h	h	h	a	a	h
chr1	AC1B0420	Unigene13141	145	G	A	S	c	a	c	h	h	h	c	c	h	a	h	h	a	c	h	h	a	c	a	h	c	a	a	a	h	h	h	h	a	a	h	h	c	h	h	c	a	h	h	h	a	a	h
chr1	AC1B0420	Unigene27232	430	G	A	S	c	a	c	h	h	h	c	c	h	a	h	h	a	c	h	h	a	c	a	h	c	a	a	a	h	h	h	h	a	a	h	h	c	h	h	c	a	h	h	h	a	a	h
chr1	AC1B0420	Unigene8339	866	T	C	S	c	a	c	h	h	h	c	c	h	a	h	h	a	c	h	h	a	c	a	h	c	a	a	a	h	h	h	h	a	a	h	h	c	h	h	c	a	h	h	h	a	a	h
chr1	AC1B0420	Unigene8988	491	A	G	S	c	a	c	h	h	h	c	c	h	a	h	h	a	c	h	h	a	c	a	h	c	a	a	a	h	h	h	h	a	a	h	h	c	h	h	c	a	h	h	h	a	a	h
chr1	AC1B0430	Unigene3798	358	C	T	S	c	h	c	h	c	h	c	c	h	a	h	h	a	c	h	h	a	c	a	h	c	a	a	a	h	h	h	h	a	a	h	h	c	h	h	c	a	h	h	h	a	a	h
chr1	AC1B0440	Unigene12905	288	C	T	S	c	h	c	h	c	h	c	c	h	a	h	h	a	c	h	h	a	c	a	h	c	a	a	a	h	h	h	h	a	a	h	h	c	h	h	c	a	h	h	h	a	a	h
chr1	AC1B0450	CL1538.Contig4	217	A	C	S	c	h	c	h	c	h	c	c	h	a	h	h	a	c	h	h	a	c	a	h	c	a	a	a	h	h	h	h	a	a	h	h	c	h	h	c	a	h	h	h	a	a	h
chr1	AC1B0450	CL5314.Contig1	654	C	A	S	c	h	c	h	c	h	c	c	h	a	h	h	a	c	h	h	a	c	a	h	c	a	a	a	h	h	h	h	a	a	h	h	c	h	h	c	a	h	h	h	a	a	h
chr1	AC1B0450	CL6446.Contig3	116	G	A	S	c	h	c	h	c	h	c	c	h	a	h	h	a	c	h	h	a	c	a	h	c	a	a	a	h	h	h	h	a	a	h	h	c	h	h	c	a	h	h	h	a	a	h
chr1	AC1B0450	Unigene12264	301	A	C	S	c	h	c	h	c	h	c	c	h	a	h	h	a	c	h	h	a	c	a	h	c	a	a	a	h	h	h	h	a	a	h	h	c	h	h	c	a	h	h	h	a	a	h
chr1	AC1B0460	Unigene13633	351	T	C	S	c	h	c	h	c	h	c	c	h	a	h	h	a	c	h	h	a	c	a	h	c	a	a	a	h	h	h	h	a	a	h	h	c	h	h	c	a	h	h	h	h	a	h
chr1	AC1B0460	Unigene21290	329	T	C	S	c	h	c	h	c	h	c	c	h	a	h	h	a	c	h	h	a	c	a	h	c	a	a	a	h	h	h	h	a	a	h	h	c	h	h	c	a	h	h	h	h	a	h
chr1	AC1B0470	CL3819.Contig1	328	G	A	S	c	h	c	h	c	h	c	c	h	a	h	h	a	c	h	h	h	c	a	h	c	a	h	a	h	h	h	h	a	a	h	h	c	h	h	c	a	h	h	h	h	a	h
chr1	AC1B0480	Unigene19729	302	T	C	S	c	h	c	h	c	h	c	c	h	a	h	h	a	c	h	h	h	c	a	h	c	a	h	a	h	h	h	h	a	a	h	h	c	h	h	c	a	h	h	h	h	a	h
chr1	AC1B0490	Unigene10585	98	C	T	S	c	h	c	h	c	h	c	c	h	a	h	h	a	c	h	h	h	c	a	h	c	a	h	a	h	h	h	h	a	a	h	h	c	h	h	c	a	h	h	h	h	a	h
chr1	AC1B0500	CL4300.Contig1	197	C	G	S	h	h	c	h	c	h	c	c	h	a	h	h	a	c	h	h	h	c	a	h	c	h	h	h	h	h	h	h	a	a	h	a	c	h	h	c	a	h	h	h	h	a	h
chr1	AC1B0500	CL6810.Contig1	405	C	T	S	h	h	c	h	c	h	c	c	h	a	h	h	a	c	h	h	h	c	a	h	c	h	h	h	h	h	h	h	a	a	h	a	c	h	h	c	a	h	h	h	h	a	h
chr1	AC1B0510	Unigene12949	1250	G	A	S	h	h	c	h	c	h	c	c	h	a	h	h	a	c	h	h	h	c	a	h	c	h	h	h	h	h	h	h	a	a	h	a	c	h	h	c	a	h	h	h	h	a	h
chr1	AC1B0520	Unigene27623	1001	G	A	S	h	h	c	h	c	h	c	c	h	a	h	h	a	c	h	h	h	c	a	h	c	h	h	h	h	h	h	h	a	a	h	a	c	h	h	c	a	h	h	h	h	a	h
chr1	AC1B0520	Unigene27998	493	C	G	S	h	h	c	h	c	h	c	c	h	a	h	h	a	c	h	h	h	c	a	h	c	h	h	h	h	h	h	h	a	a	h	a	c	h	h	c	a	h	h	h	h	a	h
chr1	AC1B0530	Unigene24771	674	T	A	S	h	h	c	h	c	h	c	c	h	a	h	h	a	c	h	h	h	c	a	h	c	h	h	h	h	h	h	h	a	a	h	a	c	h	h	c	a	h	h	h	h	a	h
chr1	AC1B0530	Unigene27499	60	T	C	S	h	h	c	h	c	h	c	c	h	a	h	h	a	c	h	h	h	c	a	h	c	h	h	h	h	h	h	h	a	a	h	a	c	h	h	c	a	h	h	h	h	a	h
chr1	AC1B0540	CL186.Contig1	207	G	C	S	h	h	c	h	c	h	c	c	h	a	h	h	a	c	h	h	h	c	a	h	c	h	h	h	h	h	h	h	a	a	h	a	c	h	h	c	a	h	h	h	h	a	h
chr1	AC1B0540	CL4236.Contig1	576	A	T	S	h	h	c	h	c	h	c	c	h	a	h	h	a	c	h	h	h	c	a	h	c	h	h	h	h	h	h	h	a	a	h	a	c	h	h	c	a	h	h	h	h	a	h
chr1	AC1B0540	Unigene12485	139	T	C	S	h	h	c	h	c	h	c	c	h	a	h	h	a	c	h	h	h	c	a	h	c	h	h	h	h	h	h	h	a	a	h	a	c	h	h	c	a	h	h	h	h	a	h
chr1	AC1B0540	Unigene27800	976	A	G	S	h	h	c	h	c	h	c	c	h	a	h	h	a	c	h	h	h	c	a	h	c	h	h	h	h	h	h	h	a	a	h	a	c	h	h	c	a	h	h	h	h	a	h
chr1	AC1B0550	Unigene14064	36	A	G	S	h	h	c	c	c	h	c	c	h	a	h	h	a	c	h	h	h	c	a	h	c	h	h	h	h	h	h	h	a	a	h	a	c	h	h	c	a	h	h	h	h	a	h
chr1	AC1B0550	Unigene7170	54	C	T	S	h	h	c	c	c	h	c	c	h	a	h	h	a	c	h	h	h	c	a	h	c	h	h	h	h	h	h	h	a	a	h	a	c	h	h	c	a	h	h	h	h	a	h
chr1	AC1B0560	Unigene8804	157	A	C	S	h	h	c	c	c	h	c	c	h	a	h	h	a	c	h	h	h	c	a	h	c	h	h	h	h	h	h	h	h	a	h	a	c	h	h	c	a	h	h	h	h	a	h
chr1	AC1B0570	CL3740.Contig1	239	T	A	S	h	h	c	c	c	h	c	c	h	a	h	h	a	c	h	h	h	c	a	h	c	h	h	h	h	h	h	h	h	a	h	a	c	h	h	c	a	h	h	h	h	a	h
chr1	AC1B0570	CL6073.Contig1	40	T	C	S	h	h	c	c	c	h	c	c	h	a	h	h	a	c	h	h	h	c	a	h	c	h	h	h	h	h	h	h	h	a	h	a	c	h	h	c	a	h	h	h	h	a	h
chr1	AC1B0570	Unigene13757	385	A	C	S	h	h	c	c	c	h	c	c	h	a	h	h	a	c	h	h	h	c	a	h	c	h	h	h	h	h	h	h	h	a	h	a	c	h	h	c	a	h	h	h	h	a	h
chr1	AC1B0570	Unigene21063	883	T	C	S	h	h	c	c	c	h	c	c	h	a	h	h	a	c	h	h	h	c	a	h	c	h	h	h	h	h	h	h	h	a	h	a	c	h	h	c	a	h	h	h	h	a	h
chr1	AC1B0570	Unigene5534	42	C	T	S	h	h	c	c	c	h	c	c	h	a	h	h	a	c	h	h	h	c	a	h	c	h	h	h	h	h	h	h	h	a	h	a	c	h	h	c	a	h	h	h	h	a	h
chr1	AC1B0580	Unigene24307	595	C	A	S	h	h	c	c	c	h	c	c	h	a	h	h	a	c	h	h	h	c	a	h	c	h	h	h	h	h	h	h	h	a	h	a	c	h	h	c	a	h	h	h	h	a	h
chr1	AC1B0580	Unigene28055	158	T	C	S	h	h	c	c	c	h	c	c	h	a	h	h	a	c	h	h	h	c	a	h	c	h	h	h	h	h	h	h	h	a	h	a	c	h	h	c	a	h	h	h	h	a	h
chr1	AC1B0590	CL1734.Contig2	817	A	G	S	h	h	c	c	c	h	c	c	h	a	h	h	a	c	h	h	h	c	a	h	c	h	h	h	h	h	h	h	h	a	h	a	c	h	h	c	a	h	h	h	h	a	h
chr1	AC1B0590	CL3535.Contig1	756	C	T	S	h	h	c	c	c	h	c	c	h	a	h	h	a	c	h	h	h	c	a	h	c	h	h	h	h	h	h	h	h	a	h	a	c	h	h	c	a	h	h	h	h	a	h
chr1	AC1B0590	Unigene3229	155	G	T	S	h	h	c	c	c	h	c	c	h	a	h	h	a	c	h	h	h	c	a	h	c	h	h	h	h	h	h	h	h	a	h	a	c	h	h	c	a	h	h	h	h	a	h
chr1	AC1B0590	Unigene9191	483	A	G	S	h	h	c	c	c	h	c	c	h	a	h	h	a	c	h	h	h	c	a	h	c	h	h	h	h	h	h	h	h	a	h	a	c	h	h	c	a	h	h	h	h	a	h
chr1	AC1B0600	CL2716.Contig1	1055	T	A	S	h	h	c	c	c	h	c	c	h	a	h	h	a	c	h	h	h	c	a	h	c	h	h	h	h	h	h	h	h	a	h	a	c	h	h	c	a	h	h	h	h	a	h
chr1	AC1B0610	Unigene10812	346	A	G	S	h	h	c	c	c	h	c	c	h	a	h	h	a	c	h	h	h	c	a	h	c	h	h	h	h	h	h	h	h	a	h	a	c	h	h	c	a	h	h	h	h	a	h
chr1	AC1B0610	Unigene25595	2243	G	A	S	h	h	c	c	c	h	c	c	h	a	h	h	a	c	h	h	h	c	a	h	c	h	h	h	h	h	h	h	h	a	h	a	c	h	h	c	a	h	h	h	h	a	h
chr1	AC1B0610	Unigene7869	330	T	A	S	h	h	c	c	c	h	c	c	h	a	h	h	a	c	h	h	h	c	a	h	c	h	h	h	h	h	h	h	h	a	h	a	c	h	h	c	a	h	h	h	h	a	h
chr1	AC1B0620	Unigene29350	300	G	C	S	h	h	c	c	c	h	c	c	h	a	h	h	a	c	h	h	h	c	a	h	c	h	h	h	h	h	h	h	h	a	h	a	c	h	h	c	a	h	h	h	h	a	h
chr1	AC1B0630	CL4620.Contig1	328	T	C	S	h	h	c	c	c	h	c	c	h	a	h	h	a	c	h	h	h	c	a	h	c	h	h	h	h	h	h	h	h	a	h	a	c	h	h	c	a	h	h	h	h	a	h
chr1	AC1B0630	CL6412.Contig2	33	T	C	S	h	h	c	c	c	h	c	c	h	a	h	h	a	c	h	h	h	c	a	h	c	h	h	h	h	h	h	h	h	a	h	a	c	h	h	c	a	h	h	h	h	a	h
chr1	AC1B0630	Unigene12719	991	G	A	S	h	h	c	c	c	h	c	c	h	a	h	h	a	c	h	h	h	c	a	h	c	h	h	h	h	h	h	h	h	a	h	a	c	h	h	c	a	h	h	h	h	a	h
chr1	AC1B0630	Unigene27584	147	T	C	S	h	h	c	c	c	h	c	c	h	a	h	h	a	c	h	h	h	c	a	h	c	h	h	h	h	h	h	h	h	a	h	a	c	h	h	c	a	h	h	h	h	a	h
chr1	AC1B0630	Unigene5237	179	G	A	S	h	h	c	c	c	h	c	c	h	a	h	h	a	c	h	h	h	c	a	h	c	h	h	h	h	h	h	h	h	a	h	a	c	h	h	c	a	h	h	h	h	a	h
chr1	AC1B0630	Unigene5238	345	G	A	S	h	h	c	c	c	h	c	c	h	a	h	h	a	c	h	h	h	c	a	h	c	h	h	h	h	h	h	h	h	a	h	a	c	h	h	c	a	h	h	h	h	a	h
chr1	AC1B0630	Unigene8499	62	C	T	S	h	h	c	c	c	h	c	c	h	a	h	h	a	c	h	h	h	c	a	h	c	h	h	h	h	h	h	h	h	a	h	a	c	h	h	c	a	h	h	h	h	a	h
chr1	AC1B0640	Unigene34913	53	T	C	S	h	h	c	c	c	h	c	c	h	a	c	h	a	c	h	h	h	c	a	h	c	h	h	h	h	h	h	h	h	a	h	a	c	h	h	c	a	a	h	a	h	a	h
chr1	AC1B0640	Unigene6670	159	T	C	S	h	h	c	c	c	h	c	c	h	a	c	h	a	c	h	h	h	c	a	h	c	h	h	h	h	h	h	h	h	a	h	a	c	h	h	c	a	a	h	a	h	a	h
chr1	AC1B0650	Unigene23628	10	C	T	S	h	h	c	c	c	h	c	c	h	a	c	h	a	c	h	h	c	c	a	h	c	h	h	h	h	h	h	h	h	a	h	a	c	h	h	c	h	h	h	a	h	a	h
chr1	AC1B0660	Unigene7080	48	C	T	S	h	h	c	c	c	h	c	c	h	a	c	h	a	c	h	h	c	c	h	h	c	h	h	h	h	h	h	h	h	a	h	a	c	h	h	c	h	h	h	a	h	a	h
chr1	AC1B0670	CL3413.Contig3	156	A	C	S	h	h	c	c	c	h	c	h	h	a	c	h	a	c	h	h	c	c	h	h	c	h	h	h	h	c	h	h	h	a	h	a	c	h	h	c	h	h	h	a	h	a	h
chr1	AC1B0680	CL5347.Contig1	192	A	G	S	h	h	c	c	c	h	c	h	h	a	c	h	a	c	h	h	c	c	h	h	c	h	h	h	h	c	h	h	h	a	h	a	c	h	h	c	h	h	h	a	h	a	h
chr1	AC1B0680	Unigene13281	844	C	A	S	h	h	c	c	c	h	c	h	h	a	c	h	a	c	h	h	c	c	h	h	c	h	h	h	h	c	h	h	h	a	h	a	c	h	h	c	h	h	h	a	h	a	h
chr1	AC1B0680	Unigene27241	614	C	T	S	h	h	c	c	c	h	c	h	h	a	c	h	a	c	h	h	c	c	h	h	c	h	h	h	h	c	h	h	h	a	h	a	c	h	h	c	h	h	h	a	h	a	h
chr1	AC1B0680	Unigene28881	170	A	T	S	h	h	c	c	c	h	c	h	h	a	c	h	a	c	h	h	c	c	h	h	c	h	h	h	h	c	h	h	h	a	h	a	c	h	h	c	h	h	h	a	h	a	h
chr1	AC1B0680	Unigene3888	462	C	T	S	h	h	c	c	c	h	c	h	h	a	c	h	a	c	h	h	c	c	h	h	c	h	h	h	h	c	h	h	h	a	h	a	c	h	h	c	h	h	h	a	h	a	h
chr1	AC1B0690	Unigene12768	74	T	C	S	h	h	c	c	c	h	h	h	h	a	c	h	a	c	h	h	c	c	h	h	c	h	h	h	h	c	h	h	h	a	h	a	c	h	h	c	h	h	h	a	h	a	h
chr1	AC1B0690	Unigene8391	40	T	C	S	h	h	c	c	c	h	h	h	h	a	c	h	a	c	h	h	c	c	h	h	c	h	h	h	h	c	h	h	h	a	h	a	c	h	h	c	h	h	h	a	h	a	h
chr1	AC1B0700	Unigene12012	190	G	A	S	h	h	c	c	c	h	h	h	h	a	c	h	a	c	h	h	c	c	h	h	c	h	h	h	h	c	h	h	h	a	h	a	c	h	h	c	h	h	h	a	h	a	h
chr1	AC1B0700	Unigene12133	76	G	A	S	h	h	c	c	c	h	h	h	h	a	c	h	a	c	h	h	c	c	h	h	c	h	h	h	h	c	h	h	h	a	h	a	c	h	h	c	h	h	h	a	h	a	h
chr1	AC1B0700	Unigene12134	223	G	A	S	h	h	c	c	c	h	h	h	h	a	c	h	a	c	h	h	c	c	h	h	c	h	h	h	h	c	h	h	h	a	h	a	c	h	h	c	h	h	h	a	h	a	h
chr1	AC1B0700	Unigene23129	907	C	T	S	h	h	c	c	c	h	h	h	h	a	c	h	a	c	h	h	c	c	h	h	c	h	h	h	h	c	h	h	h	a	h	a	c	h	h	c	h	h	h	a	h	a	h
chr1	AC1B0710	Unigene27392	170	A	G	S	h	h	c	c	c	h	h	h	h	h	c	h	a	c	h	h	c	c	h	h	h	h	h	h	h	c	h	h	h	a	h	a	c	h	h	c	h	h	h	a	h	a	h
chr1	AC1B0720	Unigene12467	421	G	A	S	h	h	c	c	c	h	h	h	h	h	c	h	a	c	h	h	c	c	h	h	h	h	h	h	h	c	h	h	h	h	h	a	h	h	h	c	h	h	h	a	h	a	h
chr1	AC1B0730	Unigene12752	284	G	A	S	h	h	c	c	c	h	h	h	h	h	c	h	a	c	h	h	c	c	h	h	h	h	h	h	h	c	h	h	h	h	h	a	h	h	h	c	h	h	h	a	h	a	h
chr1	AC1B0740	Unigene29415	98	G	A	S	h	h	c	c	c	h	h	h	h	h	c	h	a	c	h	h	c	c	h	h	h	h	h	h	h	c	h	h	h	h	h	a	h	h	h	c	h	h	h	a	h	a	h
chr1	AC1B0750	Unigene12040	389	G	A	S	h	h	c	c	c	h	h	h	h	h	c	h	a	c	h	h	c	c	h	h	h	h	h	h	h	c	h	h	h	h	h	a	h	h	h	c	h	h	h	a	h	a	h
chr1	AC1B0750	Unigene28252	2550	C	T	S	h	h	c	c	c	h	h	h	h	h	c	h	a	c	h	h	c	c	h	h	h	h	h	h	h	c	h	h	h	h	h	a	h	h	h	c	h	h	h	a	h	a	h
chr1	AC1B0760	CL3929.Contig1	361	T	C	S	h	h	c	c	c	a	h	h	h	h	c	h	a	c	h	h	c	c	h	h	h	h	h	h	h	c	h	h	h	h	h	a	h	h	h	c	h	h	h	a	h	a	h
chr1	AC1B0760	Unigene24369	52	G	T	S	h	h	c	c	c	a	h	h	h	h	c	h	a	c	h	h	c	c	h	h	h	h	h	h	h	c	h	h	h	h	h	a	h	h	h	c	h	h	h	a	h	a	h
chr1	AC1B0770	CL2476.Contig1	889	C	T	S	h	h	c	c	c	a	h	h	h	h	c	h	a	c	h	h	c	c	h	h	h	h	h	h	h	c	h	h	h	h	h	a	h	h	h	c	h	h	h	a	h	h	h
chr1	AC1B0770	Unigene22458	235	A	G	S	h	h	c	c	c	a	h	h	h	h	c	h	a	c	h	h	c	c	h	h	h	h	h	h	h	c	h	h	h	h	h	a	h	h	h	c	h	h	h	a	h	h	h
chr1	AC1B0780	CL121.Contig1	77	G	A	S	h	h	c	c	c	a	h	h	h	h	c	h	a	c	c	h	c	c	h	h	h	h	h	h	h	c	h	h	h	h	h	a	h	h	h	c	h	h	h	a	h	h	h
chr1	AC1B0790	CL2951.Contig1	39	T	A	S	h	h	c	c	c	a	h	h	h	h	c	h	a	c	c	h	c	c	h	h	h	h	h	h	h	c	h	h	h	h	h	a	h	h	h	c	h	h	a	a	h	h	h
chr1	AC1B0790	Unigene20589	434	T	C	S	h	h	c	c	c	a	h	h	h	h	c	h	a	c	c	h	c	c	h	h	h	h	h	h	h	c	h	h	h	h	h	a	h	h	h	c	h	h	a	a	h	h	h
chr1	AC1B0800	CL2591.Contig1	1062	A	T	S	h	h	c	c	c	a	h	h	h	h	c	h	a	c	c	h	c	c	h	h	h	h	h	h	h	c	h	h	h	h	h	a	h	h	h	c	h	h	a	a	h	h	h
chr1	AC1B0800	CL3464.Contig1	715	A	G	S	h	h	c	c	c	a	h	h	h	h	c	h	a	c	c	h	c	c	h	h	h	h	h	h	h	c	h	h	h	h	h	a	h	h	h	c	h	h	a	a	h	h	h
chr1	AC1B0800	CL3955.Contig2	173	G	A	S	h	h	c	c	c	a	h	h	h	h	c	h	a	c	c	h	c	c	h	h	h	h	h	h	h	c	h	h	h	h	h	a	h	h	h	c	h	h	a	a	h	h	h
chr1	AC1B0800	Unigene10708	281	G	A	S	h	h	c	c	c	a	h	h	h	h	c	h	a	c	c	h	c	c	h	h	h	h	h	h	h	c	h	h	h	h	h	a	h	h	h	c	h	h	a	a	h	h	h
chr1	AC1B0800	Unigene12099	1007	G	A	S	h	h	c	c	c	a	h	h	h	h	c	h	a	c	c	h	c	c	h	h	h	h	h	h	h	c	h	h	h	h	h	a	h	h	h	c	h	h	a	a	h	h	h
chr1	AC1B0800	Unigene14024	167	A	G	S	h	h	c	c	c	a	h	h	h	h	c	h	a	c	c	h	c	c	h	h	h	h	h	h	h	c	h	h	h	h	h	a	h	h	h	c	h	h	a	a	h	h	h
chr1	AC1B0800	Unigene14458	561	A	C	S	h	h	c	c	c	a	h	h	h	h	c	h	a	c	c	h	c	c	h	h	h	h	h	h	h	c	h	h	h	h	h	a	h	h	h	c	h	h	a	a	h	h	h
chr1	AC1B0800	Unigene27282	54	C	G	S	h	h	c	c	c	a	h	h	h	h	c	h	a	c	c	h	c	c	h	h	h	h	h	h	h	c	h	h	h	h	h	a	h	h	h	c	h	h	a	a	h	h	h
chr1	AC1B0800	Unigene4368	188	T	G	S	h	h	c	c	c	a	h	h	h	h	c	h	a	c	c	h	c	c	h	h	h	h	h	h	h	c	h	h	h	h	h	a	h	h	h	c	h	h	a	a	h	h	h
chr1	AC1B0810	Unigene28666	82	G	A	S	h	h	c	c	c	a	h	h	h	h	c	h	a	c	c	h	c	c	h	h	h	h	h	h	h	c	h	h	h	h	h	a	h	h	h	c	h	h	a	a	h	h	h
chr1	AC1B0820	Unigene13485	1111	A	G	S	h	h	c	c	c	a	h	h	h	h	c	h	a	c	c	h	c	c	h	h	h	h	h	h	h	c	h	h	h	h	h	a	h	h	h	c	h	h	a	a	h	h	h
chr1	AC1B0830	CL69.Contig1	88	A	T	S	h	h	c	c	c	a	h	h	h	h	c	h	a	c	c	h	c	c	h	h	h	h	h	h	h	c	h	a	h	h	h	a	h	h	h	c	h	h	a	a	h	h	h
chr1	AC1B0830	Unigene23458	340	A	C	S	h	h	c	c	c	a	h	h	h	h	c	h	a	c	c	h	c	c	h	h	h	h	h	h	h	c	h	a	h	h	h	a	h	h	h	c	h	h	a	a	h	h	h
chr1	AC1B0840	CL3219.Contig1	879	G	A	S	h	h	c	c	c	a	h	h	h	h	c	h	a	c	c	h	c	c	h	h	h	h	h	h	h	c	h	a	h	h	h	a	h	h	h	c	h	h	a	a	h	h	h
chr1	AC1B0840	Unigene31467	218	A	G	S	h	h	c	c	c	a	h	h	h	h	c	h	a	c	c	h	c	c	h	h	h	h	h	h	h	c	h	a	h	h	h	a	h	h	h	c	h	h	a	a	h	h	h
chr1	AC1B0850	CL1155.Contig2	516	C	T	S	h	h	c	c	c	a	c	h	h	h	c	h	a	c	c	h	c	c	h	h	h	h	h	h	h	c	h	a	h	h	h	a	h	h	h	c	h	h	a	a	h	h	h
chr1	AC1B0850	CL3150.Contig2	49	A	G	S	h	h	c	c	c	a	c	h	h	h	c	h	a	c	c	h	c	c	h	h	h	h	h	h	h	c	h	a	h	h	h	a	h	h	h	c	h	h	a	a	h	h	h
chr1	AC1B0850	Unigene13121	119	T	C	S	h	h	c	c	c	a	c	h	h	h	c	h	a	c	c	h	c	c	h	h	h	h	h	h	h	c	h	a	h	h	h	a	h	h	h	c	h	h	a	a	h	h	h
chr1	AC1B0850	Unigene13170	276	C	T	S	h	h	c	c	c	a	c	h	h	h	c	h	a	c	c	h	c	c	h	h	h	h	h	h	h	c	h	a	h	h	h	a	h	h	h	c	h	h	a	a	h	h	h
chr1	AC1B0850	Unigene26331	111	T	C	S	h	h	c	c	c	a	c	h	h	h	c	h	a	c	c	h	c	c	h	h	h	h	h	h	h	c	h	a	h	h	h	a	h	h	h	c	h	h	a	a	h	h	h
chr1	AC1B0850	Unigene27482	149	T	A	S	h	h	c	c	c	a	c	h	h	h	c	h	a	c	c	h	c	c	h	h	h	h	h	h	h	c	h	a	h	h	h	a	h	h	h	c	h	h	a	a	h	h	h
chr1	AC1B0850	Unigene28253	295	T	C	S	h	h	c	c	c	a	c	h	h	h	c	h	a	c	c	h	c	c	h	h	h	h	h	h	h	c	h	a	h	h	h	a	h	h	h	c	h	h	a	a	h	h	h
chr1	AC1B0850	Unigene28278	382	T	A	S	h	h	c	c	c	a	c	h	h	h	c	h	a	c	c	h	c	c	h	h	h	h	h	h	h	c	h	a	h	h	h	a	h	h	h	c	h	h	a	a	h	h	h
chr1	AC1B0850	Unigene5956	157	A	G	S	h	h	c	c	c	a	c	h	h	h	c	h	a	c	c	h	c	c	h	h	h	h	h	h	h	c	h	a	h	h	h	a	h	h	h	c	h	h	a	a	h	h	h
chr1	AC1B0860	Unigene12169	441	C	T	S	h	h	c	c	c	a	c	h	h	h	c	h	a	c	c	h	c	c	h	h	h	h	h	h	h	c	h	a	h	h	h	a	h	h	h	c	h	h	a	a	h	h	h
chr1	AC1B0860	Unigene26078	634	T	C	S	h	h	c	c	c	a	c	h	h	h	c	h	a	c	c	h	c	c	h	h	h	h	h	h	h	c	h	a	h	h	h	a	h	h	h	c	h	h	a	a	h	h	h
chr1	AC1B0870	CL2152.Contig1	256	C	A	S	h	h	c	c	c	a	c	h	h	h	c	h	a	c	c	h	c	c	h	h	h	h	h	h	h	c	h	a	h	h	h	a	h	h	h	c	h	h	a	a	h	h	h
chr1	AC1B0870	Unigene10318	196	A	G	S	h	h	c	c	c	a	c	h	h	h	c	h	a	c	c	h	c	c	h	h	h	h	h	h	h	c	h	a	h	h	h	a	h	h	h	c	h	h	a	a	h	h	h
chr1	AC1B0870	Unigene27865	146	C	T	S	h	h	c	c	c	a	c	h	h	h	c	h	a	c	c	h	c	c	h	h	h	h	h	h	h	c	h	a	h	h	h	a	h	h	h	c	h	h	a	a	h	h	h
chr1	AC1B0870	Unigene9596	221	T	C	S	h	h	c	c	c	a	c	h	h	h	c	h	a	c	c	h	c	c	h	h	h	h	h	h	h	c	h	a	h	h	h	a	h	h	h	c	h	h	a	a	h	h	h
chr1	AC1B0890	CL4242.Contig2	367	C	T	S	h	h	c	c	c	a	c	h	h	h	c	h	a	c	c	h	h	c	h	h	h	h	h	h	h	c	h	a	h	h	h	a	h	h	h	c	h	h	a	a	h	h	h
chr1	AC1B0890	Unigene13535	39	C	T	S	h	h	c	c	c	a	c	h	h	h	c	h	a	c	c	h	h	c	h	h	h	h	h	h	h	c	h	a	h	h	h	a	h	h	h	c	h	h	a	a	h	h	h
chr1	AC1B0890	Unigene27761	1176	C	T	S	h	h	c	c	c	a	c	h	h	h	c	h	a	c	c	h	h	c	h	h	h	h	h	h	h	c	h	a	h	h	h	a	h	h	h	c	h	h	a	a	h	h	h
chr1	AC1B0900	CL4887.Contig2	64	G	A	S	h	c	c	c	c	a	c	h	h	h	c	h	a	c	c	h	h	c	h	h	h	h	h	h	h	c	h	a	h	h	h	a	h	h	h	c	h	h	a	a	h	h	h
chr1	AC1B0900	CL761.Contig3	270	A	G	S	h	c	c	c	c	a	c	h	h	h	c	h	a	c	c	h	h	c	h	h	h	h	h	h	h	c	h	a	h	h	h	a	h	h	h	c	h	h	a	a	h	h	h
chr1	AC1B0900	Unigene28387	51	G	T	S	h	c	c	c	c	a	c	h	h	h	c	h	a	c	c	h	h	c	h	h	h	h	h	h	h	c	h	a	h	h	h	a	h	h	h	c	h	h	a	a	h	h	h
chr1	AC1B0900	Unigene29049	143	C	T	S	h	c	c	c	c	a	c	h	h	h	c	h	a	c	c	h	h	c	h	h	h	h	h	h	h	c	h	a	h	h	h	a	h	h	h	c	h	h	a	a	h	h	h
chr1	AC1B0910	CL3431.Contig2	300	C	T	S	h	c	c	c	c	a	c	h	h	h	c	h	a	c	c	h	h	c	h	h	h	h	h	h	h	c	h	a	h	h	h	a	h	h	h	c	h	h	a	a	h	h	h
chr1	AC1B0910	Unigene13017	579	G	A	S	h	c	c	c	c	a	c	h	h	h	c	h	a	c	c	h	h	c	h	h	h	h	h	h	h	c	h	a	h	h	h	a	h	h	h	c	h	h	a	a	h	h	h
chr1	AC1B0910	Unigene13481	179	G	A	S	h	c	c	c	c	a	c	h	h	h	c	h	a	c	c	h	h	c	h	h	h	h	h	h	h	c	h	a	h	h	h	a	h	h	h	c	h	h	a	a	h	h	h
chr1	AC1B0910	Unigene15345	125	T	C	S	h	c	c	c	c	a	c	h	h	h	c	h	a	c	c	h	h	c	h	h	h	h	h	h	h	c	h	a	h	h	h	a	h	h	h	c	h	h	a	a	h	h	h
chr1	AC1B0910	Unigene21677	2322	A	G	S	h	c	c	c	c	a	c	h	h	h	c	h	a	c	c	h	h	c	h	h	h	h	h	h	h	c	h	a	h	h	h	a	h	h	h	c	h	h	a	a	h	h	h
chr1	AC1B0910	Unigene22018	328	T	A	S	h	c	c	c	c	a	c	h	h	h	c	h	a	c	c	h	h	c	h	h	h	h	h	h	h	c	h	a	h	h	h	a	h	h	h	c	h	h	a	a	h	h	h
chr1	AC1B0910	Unigene23956	329	A	G	S	h	c	c	c	c	a	c	h	h	h	c	h	a	c	c	h	h	c	h	h	h	h	h	h	h	c	h	a	h	h	h	a	h	h	h	c	h	h	a	a	h	h	h
chr1	AC1B0910	Unigene27946	119	G	A	S	h	c	c	c	c	a	c	h	h	h	c	h	a	c	c	h	h	c	h	h	h	h	h	h	h	c	h	a	h	h	h	a	h	h	h	c	h	h	a	a	h	h	h
chr1	AC1B0910	Unigene28999	687	A	C	S	h	c	c	c	c	a	c	h	h	h	c	h	a	c	c	h	h	c	h	h	h	h	h	h	h	c	h	a	h	h	h	a	h	h	h	c	h	h	a	a	h	h	h
chr1	AC1B0910	Unigene6067	83	G	C	S	h	c	c	c	c	a	c	h	h	h	c	h	a	c	c	h	h	c	h	h	h	h	h	h	h	c	h	a	h	h	h	a	h	h	h	c	h	h	a	a	h	h	h
chr1	AC1B0920	CL1077.Contig2	376	C	T	S	h	c	c	c	c	a	c	h	h	h	c	h	a	c	c	h	h	c	h	h	h	h	h	h	h	c	c	a	h	h	h	a	h	h	h	c	h	h	a	a	h	h	h
chr1	AC1B0920	CL1280.Contig1	383	C	T	S	h	c	c	c	c	a	c	h	h	h	c	h	a	c	c	h	h	c	h	h	h	h	h	h	h	c	c	a	h	h	h	a	h	h	h	c	h	h	a	a	h	h	h
chr1	AC1B0920	CL5428.Contig1	575	T	C	S	h	c	c	c	c	a	c	h	h	h	c	h	a	c	c	h	h	c	h	h	h	h	h	h	h	c	c	a	h	h	h	a	h	h	h	c	h	h	a	a	h	h	h
chr1	AC1B0920	Unigene12765	1153	C	T	S	h	c	c	c	c	a	c	h	h	h	c	h	a	c	c	h	h	c	h	h	h	h	h	h	h	c	c	a	h	h	h	a	h	h	h	c	h	h	a	a	h	h	h
chr1	AC1B0920	Unigene16200	2208	T	C	S	h	c	c	c	c	a	c	h	h	h	c	h	a	c	c	h	h	c	h	h	h	h	h	h	h	c	c	a	h	h	h	a	h	h	h	c	h	h	a	a	h	h	h
chr1	AC1B0920	Unigene6076	450	G	A	S	h	c	c	c	c	a	c	h	h	h	c	h	a	c	c	h	h	c	h	h	h	h	h	h	h	c	c	a	h	h	h	a	h	h	h	c	h	h	a	a	h	h	h
chr1	AC1B0930	Unigene27310	548	G	A	S	h	c	c	c	c	a	c	h	h	h	c	h	a	c	c	h	h	c	h	h	h	h	h	h	h	c	c	a	h	h	h	a	h	h	h	c	h	h	a	a	h	h	h
chr1	AC1B0930	Unigene28882	629	G	T	S	h	c	c	c	c	a	c	h	h	h	c	h	a	c	c	h	h	c	h	h	h	h	h	h	h	c	c	a	h	h	h	a	h	h	h	c	h	h	a	a	h	h	h
chr1	AC1B0940	CL5373.Contig2	1260	A	G	S	h	c	c	c	c	a	c	a	a	h	c	h	a	c	c	h	h	c	h	h	h	h	h	a	h	c	c	a	h	h	h	a	h	h	h	c	c	h	a	a	h	h	h
chr1	AC1B0950	CL36.Contig1	498	G	A	S	h	c	c	c	c	a	c	a	a	h	c	a	a	c	c	h	h	c	h	h	h	h	h	a	c	c	c	a	h	h	h	h	h	h	h	c	c	h	a	a	h	h	h
chr1	AC1B0950	Unigene11102	638	G	A	S	h	c	c	c	c	a	c	a	a	h	c	a	a	c	c	h	h	c	h	h	h	h	h	a	c	c	c	a	h	h	h	h	h	h	h	c	c	h	a	a	h	h	h
chr1	AC1B0950	Unigene16122	343	G	T	S	h	c	c	c	c	a	c	a	a	h	c	a	a	c	c	h	h	c	h	h	h	h	h	a	c	c	c	a	h	h	h	h	h	h	h	c	c	h	a	a	h	h	h
chr1	AC1B0950	Unigene27470	237	C	A	S	h	c	c	c	c	a	c	a	a	h	c	a	a	c	c	h	h	c	h	h	h	h	h	a	c	c	c	a	h	h	h	h	h	h	h	c	c	h	a	a	h	h	h
chr1	AC1B0950	Unigene27803	127	A	T	S	h	c	c	c	c	a	c	a	a	h	c	a	a	c	c	h	h	c	h	h	h	h	h	a	c	c	c	a	h	h	h	h	h	h	h	c	c	h	a	a	h	h	h
chr1	AC1B0960	Unigene13713	185	A	G	S	h	c	c	c	c	a	c	a	a	h	c	a	a	c	c	h	h	c	h	h	h	h	h	a	c	c	c	a	h	h	h	h	h	h	h	c	c	h	a	a	c	h	h
chr1	AC1B0970	Unigene27869	2648	T	A	S	h	c	c	c	c	a	c	a	a	h	c	a	a	c	c	h	h	c	h	h	h	h	h	a	c	c	c	a	h	h	h	h	h	h	h	c	c	h	a	a	c	h	h
chr1	AC1B0970	Unigene4625	100	C	A	S	h	c	c	c	c	a	c	a	a	h	c	a	a	c	c	h	h	c	h	h	h	h	h	a	c	c	c	a	h	h	h	h	h	h	h	c	c	h	a	a	c	h	h
chr1	AC1B0980	Unigene11284	147	A	G	S	h	c	h	c	c	a	c	a	a	h	c	a	a	c	c	h	h	h	h	h	c	h	h	a	c	c	c	a	h	h	h	c	h	h	h	h	c	h	a	a	c	h	h
chr1	AC1B0980	Unigene11285	243	A	G	S	h	c	h	c	c	a	c	a	a	h	c	a	a	c	c	h	h	h	h	h	c	h	h	a	c	c	c	a	h	h	h	c	h	h	h	h	c	h	a	a	c	h	h
chr1	AC1B0990	Unigene21198	741	T	C	S	h	c	h	c	c	a	c	a	a	h	c	a	a	c	c	h	h	h	h	h	c	h	h	a	c	c	c	a	h	h	h	c	h	h	c	h	c	h	a	a	c	h	h
chr1	AC1B0990	Unigene28704	146	T	A	S	h	c	h	c	c	a	c	a	a	h	c	a	a	c	c	h	h	h	h	h	c	c	h	a	c	c	c	a	h	h	h	c	h	h	c	h	c	h	a	a	c	h	h
chr2	AC2B0010	CL1461.Contig1	383	A	G	S	h	h	c	a	h	c	h	a	c	h	h	a	h	h	h	h	h	a	a	h	h	h	c	a	h	h	h	h	h	h	a	a	c	h	a	c	a	a	c	h	c	c	h
chr2	AC2B0020	Unigene28245	461	G	A	S	h	h	c	a	h	c	h	a	c	h	h	a	h	h	h	h	h	a	a	h	h	h	c	a	h	h	h	h	h	h	a	a	h	h	a	c	a	a	c	h	c	c	h
chr2	AC2B0030	Unigene27689	686	A	G	S	h	h	h	a	h	c	h	a	c	h	h	a	h	h	h	h	h	a	a	h	h	h	c	a	h	h	a	h	h	h	a	a	h	h	a	c	a	a	c	h	h	c	h
chr2	AC2B0040	CL6217.Contig2	763	G	A	S	h	h	h	a	h	c	h	a	c	h	h	a	a	h	h	h	h	a	a	h	h	h	c	a	h	h	a	h	h	h	a	a	h	h	h	c	a	a	c	h	h	c	h
chr2	AC2B0040	Unigene27285	37	A	G	S	h	h	h	a	h	c	h	a	c	h	h	a	a	h	h	h	h	a	a	h	h	h	c	a	h	h	a	h	h	h	a	a	h	h	h	c	a	a	c	h	h	c	h
chr2	AC2B0040	Unigene28076	748	T	C	S	h	h	h	a	h	c	h	a	c	h	h	a	a	h	h	h	h	a	a	h	h	h	c	a	h	h	a	h	h	h	a	a	h	h	h	c	a	a	c	h	h	c	h
chr2	AC2B0040	Unigene29540	52	A	G	S	h	h	h	a	h	c	h	a	c	h	h	a	a	h	h	h	h	a	a	h	h	h	c	a	h	h	a	h	h	h	a	a	h	h	h	c	a	a	c	h	h	c	h
chr2	AC2B0050	Unigene8753	125	T	C	S	h	h	h	a	h	c	h	a	c	h	h	a	a	h	h	h	h	a	a	h	h	h	c	a	h	h	a	h	h	h	a	a	h	h	h	c	a	a	c	h	h	c	h
chr2	AC2B0050	Unigene9937	47	C	A	S	h	h	h	a	h	c	h	a	c	h	h	a	a	h	h	h	h	a	a	h	h	h	c	a	h	h	a	h	h	h	a	a	h	h	h	c	a	a	c	h	h	c	h
chr2	AC2B0060	CL3670.Contig4	260	G	A	S	h	h	h	a	h	c	a	a	c	h	h	a	a	h	h	h	h	a	a	h	h	h	c	a	h	h	a	h	h	h	a	a	h	h	h	h	a	a	c	h	h	c	h
chr2	AC2B0060	CL4197.Contig1	2039	T	C	S	h	h	h	a	h	c	a	a	c	h	h	a	a	h	h	h	h	a	a	h	h	h	c	a	h	h	a	h	h	h	a	a	h	h	h	h	a	a	c	h	h	c	h
chr2	AC2B0060	Unigene12527	616	T	C	S	h	h	h	a	h	c	a	a	c	h	h	a	a	h	h	h	h	a	a	h	h	h	c	a	h	h	a	h	h	h	a	a	h	h	h	h	a	a	c	h	h	c	h
chr2	AC2B0060	Unigene162	191	C	A	S	h	h	h	a	h	c	a	a	c	h	h	a	a	h	h	h	h	a	a	h	h	h	c	a	h	h	a	h	h	h	a	a	h	h	h	h	a	a	c	h	h	c	h
chr2	AC2B0060	Unigene23526	1385	A	G	S	h	h	h	a	h	c	a	a	c	h	h	a	a	h	h	h	h	a	a	h	h	h	c	a	h	h	a	h	h	h	a	a	h	h	h	h	a	a	c	h	h	c	h
chr2	AC2B0060	Unigene24699	464	G	C	S	h	h	h	a	h	c	a	a	c	h	h	a	a	h	h	h	h	a	a	h	h	h	c	a	h	h	a	h	h	h	a	a	h	h	h	h	a	a	c	h	h	c	h
chr2	AC2B0060	Unigene26908	945	T	C	S	h	h	h	a	h	c	a	a	c	h	h	a	a	h	h	h	h	a	a	h	h	h	c	a	h	h	a	h	h	h	a	a	h	h	h	h	a	a	c	h	h	c	h
chr2	AC2B0070	CL5148.Contig1	203	G	A	S	h	h	h	a	h	c	a	a	h	h	h	a	a	h	h	h	h	a	a	h	h	h	c	a	h	h	a	h	h	h	a	a	h	h	h	h	a	a	c	h	h	c	h
chr2	AC2B0080	Unigene12323	101	G	T	S	h	h	h	a	h	c	a	a	h	c	h	a	a	h	h	h	h	a	a	h	h	h	c	a	h	h	a	h	h	h	a	a	h	h	h	h	a	a	c	h	h	c	h
chr2	AC2B0090	Unigene24250	604	G	A	S	h	h	h	a	h	c	a	a	h	c	h	a	a	h	h	h	h	a	a	h	h	h	c	a	a	h	a	h	h	h	a	a	h	h	h	h	a	a	c	h	h	c	h
chr2	AC2B0100	CL5188.Contig2	408	G	A	S	h	h	h	a	h	c	a	a	h	c	h	a	a	h	h	h	h	a	a	h	h	h	c	a	a	h	a	h	h	h	a	a	h	h	h	h	a	a	c	h	h	c	h
chr2	AC2B0110	Unigene12359	215	T	C	S	h	h	h	a	h	c	a	a	h	c	h	a	a	h	h	h	h	a	a	h	h	h	c	a	a	h	a	h	h	h	a	a	h	h	h	h	a	a	c	h	h	c	h
chr2	AC2B0120	Unigene23595	30	T	A	S	h	h	h	a	h	c	a	a	h	c	h	a	a	h	h	h	h	a	a	h	h	h	c	a	a	h	a	h	h	h	h	a	h	h	h	h	a	a	c	h	h	c	h
chr2	AC2B0120	Unigene572	48	T	C	S	h	h	h	a	h	c	a	a	h	c	h	a	a	h	h	h	h	a	a	h	h	h	c	a	a	h	a	h	h	h	h	a	h	h	h	h	a	a	c	h	h	c	h
chr2	AC2B0120	Unigene8487	1338	G	A	S	h	h	h	a	h	c	a	a	h	c	h	a	a	h	h	h	h	a	a	h	h	h	c	a	a	h	a	h	h	h	h	a	h	h	h	h	a	a	c	h	h	c	h
chr2	AC2B0120	Unigene8488	378	T	C	S	h	h	h	a	h	c	a	a	h	c	h	a	a	h	h	h	h	a	a	h	h	h	c	a	a	h	a	h	h	h	h	a	h	h	h	h	a	a	c	h	h	c	h
chr2	AC2B0120	Unigene26630	91	G	C	S	h	h	h	a	h	c	a	a	h	c	h	a	a	h	h	h	h	a	a	h	h	h	c	a	a	h	a	h	h	h	h	a	h	h	h	h	a	a	c	h	h	c	h
chr2	AC2B0130	CL3726.Contig1	235	C	T	S	h	h	h	a	h	c	a	a	h	c	h	a	a	h	h	h	h	a	a	h	h	h	c	h	a	h	a	h	h	h	h	a	h	h	h	h	a	a	c	h	h	c	h
chr2	AC2B0130	Unigene10061	190	T	C	S	h	h	h	a	h	c	a	a	h	c	h	a	a	h	h	h	h	a	a	h	h	h	c	h	a	h	a	h	h	h	h	a	h	h	h	h	a	a	c	h	h	c	h
chr2	AC2B0130	Unigene10176	1239	G	A	S	h	h	h	a	h	c	a	a	h	c	h	a	a	h	h	h	h	a	a	h	h	h	c	h	a	h	a	h	h	h	h	a	h	h	h	h	a	a	c	h	h	c	h
chr2	AC2B0130	Unigene12647	824	G	A	S	h	h	h	a	h	c	a	a	h	c	h	a	a	h	h	h	h	a	a	h	h	h	c	h	a	h	a	h	h	h	h	a	h	h	h	h	a	a	c	h	h	c	h
chr2	AC2B0130	Unigene30182	316	A	T	S	h	h	h	a	h	c	a	a	h	c	h	a	a	h	h	h	h	a	a	h	h	h	c	h	a	h	a	h	h	h	h	a	h	h	h	h	a	a	c	h	h	c	h
chr2	AC2B0140	CL5861.Contig1	134	C	G	S	h	h	h	a	h	c	a	a	h	c	h	a	a	h	h	h	h	a	a	h	h	h	c	h	a	h	a	h	h	h	h	a	h	h	h	h	a	a	c	h	h	c	h
chr2	AC2B0150	Unigene25358	1422	G	A	S	h	h	h	a	h	c	a	a	h	c	a	a	a	h	h	h	h	a	a	h	h	h	c	h	a	h	a	h	h	h	h	a	h	h	h	h	a	a	c	h	h	c	h
chr2	AC2B0160	Unigene8023	291	G	C	S	h	h	h	a	h	h	a	a	h	c	h	a	a	h	h	h	h	a	a	h	h	h	h	h	a	h	h	h	h	h	h	a	h	h	h	h	a	a	c	h	h	c	h
chr2	AC2B0170	CL4449.Contig1	459	T	C	S	h	h	h	a	h	c	a	a	h	c	h	a	a	h	h	h	h	a	a	h	h	h	h	h	a	h	h	h	h	h	h	a	h	h	h	h	a	a	c	h	h	c	h
chr2	AC2B0170	Unigene22886	280	A	T	S	h	h	h	a	h	c	a	a	h	c	h	a	a	h	h	h	h	a	a	h	h	h	h	h	a	h	h	h	h	h	h	a	h	h	h	h	a	a	c	h	h	c	h
chr2	AC2B0170	Unigene32112	135	T	C	S	h	h	h	a	h	c	a	a	h	c	h	a	a	h	h	h	h	a	a	h	h	h	h	h	a	h	h	h	h	h	h	a	h	h	h	h	a	a	c	h	h	c	h
chr2	AC2B0180	CL4224.Contig1	61	G	A	S	h	h	h	a	h	c	a	a	h	c	h	a	a	h	h	h	h	a	a	h	h	h	h	h	a	h	h	h	h	h	h	a	h	h	h	h	a	a	c	h	h	c	h
chr2	AC2B0180	Unigene25270	272	A	G	S	h	h	h	a	h	c	a	a	h	c	h	a	a	h	h	h	h	a	a	h	h	h	h	h	a	h	h	h	h	h	h	a	h	h	h	h	a	a	c	h	h	c	h
chr2	AC2B0180	Unigene5448	15	C	T	S	h	h	h	a	h	c	a	a	h	c	h	a	a	h	h	h	h	a	a	h	h	h	h	h	a	h	h	h	h	h	h	a	h	h	h	h	a	a	c	h	h	c	h
chr2	AC2B0190	Unigene25645	747	T	C	S	h	h	h	a	h	c	a	a	h	c	h	a	a	h	a	h	h	a	h	h	h	h	h	h	a	h	h	h	h	h	h	a	h	h	h	h	a	a	c	h	h	c	h
chr2	AC2B0190	Unigene25646	194	T	C	S	h	h	h	a	h	c	a	a	h	c	h	a	a	h	a	h	h	a	h	h	h	h	h	h	a	h	h	h	h	h	h	a	h	h	h	h	a	a	c	h	h	c	h
chr2	AC2B0190	Unigene12187	186	G	A	S	h	h	h	a	h	c	a	a	h	c	h	a	a	h	a	h	h	a	h	h	h	h	h	h	a	h	h	h	h	h	h	a	h	h	h	h	a	a	c	h	h	c	h
chr2	AC2B0190	Unigene26747	71	C	A	S	h	h	h	a	h	c	a	a	h	c	h	a	a	h	a	h	h	a	h	h	h	h	h	h	a	h	h	h	h	h	h	a	h	h	h	h	a	a	c	h	h	c	h
chr2	AC2B0190	Unigene27933	118	A	C	S	h	h	h	a	h	c	a	a	h	c	h	a	a	h	a	h	h	a	h	h	h	h	h	h	a	h	h	h	h	h	h	a	h	h	h	h	a	a	c	h	h	c	h
chr2	AC2B0190	Unigene28823	443	C	T	S	h	h	h	a	h	c	a	a	h	c	h	a	a	h	a	h	h	a	h	h	h	h	h	h	a	h	h	h	h	h	h	a	h	h	h	h	a	a	c	h	h	c	h
chr2	AC2B0200	Unigene27516	35	A	G	S	h	h	h	a	h	c	a	a	h	c	h	a	a	h	a	h	h	a	h	h	h	h	h	h	a	h	h	h	h	h	h	a	h	h	h	h	a	a	c	h	h	h	h
chr2	AC2B0210	CL6739.Contig2	30	T	A	S	h	h	h	a	h	c	a	a	h	c	h	a	a	h	a	h	h	a	h	h	h	h	h	h	a	h	h	h	h	h	h	a	h	h	h	h	a	a	c	h	h	h	h
chr2	AC2B0210	Unigene28065	497	A	G	S	h	h	h	a	h	c	a	a	h	c	h	a	a	h	a	h	h	a	h	h	h	h	h	h	a	h	h	h	h	h	h	a	h	h	h	h	a	a	c	h	h	h	h
chr2	AC2B0210	Unigene5126	705	T	C	S	h	h	h	a	h	c	a	a	h	c	h	a	a	h	a	h	h	a	h	h	h	h	h	h	a	h	h	h	h	h	h	a	h	h	h	h	a	a	c	h	h	h	h
chr2	AC2B0210	Unigene7357	170	C	T	S	h	h	h	a	h	c	a	a	h	c	h	a	a	h	a	h	h	a	h	h	h	h	h	h	a	h	h	h	h	h	h	a	h	h	h	h	a	a	c	h	h	h	h
chr2	AC2B0220	Unigene27180	167	G	T	S	h	h	h	a	h	c	a	a	h	c	h	a	a	h	a	h	h	a	h	h	h	h	h	h	a	h	h	h	h	h	h	a	h	h	h	h	a	a	c	h	h	h	h
chr2	AC2B0220	Unigene8798	177	T	G	S	h	h	h	a	h	c	a	a	h	c	h	a	a	h	a	h	h	a	h	h	h	h	h	h	a	h	h	h	h	h	h	a	h	h	h	h	a	a	c	h	h	h	h
chr2	AC2B0230	Unigene27326	168	C	T	S	h	h	h	a	h	c	a	a	h	c	h	a	a	h	a	h	h	a	h	h	h	h	h	h	a	h	h	h	h	h	h	a	h	h	h	h	a	a	c	h	h	h	h
chr2	AC2B0230	Unigene8337	195	T	C	S	h	h	h	a	h	c	a	a	h	c	h	a	a	h	a	h	h	a	h	h	h	h	h	h	a	h	h	h	h	h	h	a	h	h	h	h	a	a	c	h	h	h	h
chr2	AC2B0240	Unigene25065	205	C	A	S	h	h	h	a	h	c	a	a	h	c	h	a	a	h	a	h	h	a	h	h	h	h	h	h	a	h	h	h	h	h	h	a	h	h	h	h	a	a	c	h	h	h	h
chr2	AC2B0240	Unigene26127	803	C	T	S	h	h	h	a	h	c	a	a	h	c	h	a	a	h	a	h	h	a	h	h	h	h	h	h	a	h	h	h	h	h	h	a	h	h	h	h	a	a	c	h	h	h	h
chr2	AC2B0250	Unigene12704	636	G	A	S	h	h	h	a	h	c	a	a	h	c	h	a	a	h	a	h	h	a	h	h	h	h	h	h	a	h	h	h	h	h	h	a	h	h	h	h	a	h	c	h	h	h	c
chr2	AC2B0260	Unigene19007	160	A	G	S	h	h	h	a	h	c	a	a	h	c	h	a	a	h	a	h	h	a	h	h	h	h	h	h	a	h	h	h	h	h	h	a	h	h	h	h	a	h	c	h	h	h	c
chr2	AC2B0270	Unigene28167	136	T	C	S	h	h	h	a	h	c	a	a	h	c	h	a	a	h	a	h	h	a	h	h	h	h	h	h	a	h	h	h	h	h	h	a	h	h	h	h	a	h	c	h	h	h	c
chr2	AC2B0280	Unigene26405	195	T	C	S	h	h	h	a	h	c	a	a	h	c	h	a	a	h	a	h	h	a	h	h	h	h	a	h	a	h	h	h	h	h	h	a	h	h	h	h	a	h	c	h	h	h	c
chr2	AC2B0290	Unigene30114	31	T	C	S	h	h	h	a	h	c	a	a	h	c	h	a	a	h	a	h	h	a	h	h	h	h	a	h	a	h	h	h	h	h	h	a	h	h	h	h	a	h	c	h	h	h	c
chr2	AC2B0300	CL3553.Contig2	340	G	A	S	h	h	h	a	h	c	a	a	h	c	h	a	a	h	a	h	h	a	h	h	h	h	a	h	a	h	h	h	h	h	h	a	h	h	h	h	a	h	c	h	h	h	c
chr2	AC2B0300	Unigene27550	255	G	A	S	h	h	h	a	h	c	a	a	h	c	h	a	a	h	a	h	h	a	h	h	h	h	a	h	a	h	h	h	h	h	h	a	h	h	h	h	a	h	c	h	h	h	c
chr2	AC2B0300	Unigene30480	213	C	T	S	h	h	h	a	h	c	a	a	h	c	h	a	a	h	a	h	h	a	h	h	h	h	a	h	a	h	h	h	h	h	h	a	h	h	h	h	a	h	c	h	h	h	c
chr2	AC2B0310	CL6946.Contig1	65	T	C	S	h	h	h	a	h	c	a	a	h	c	h	a	a	h	a	h	h	a	h	h	h	h	a	h	a	h	h	h	h	h	h	a	h	h	h	h	a	h	h	h	h	h	c
chr2	AC2B0320	Unigene13920	87	A	G	S	h	h	h	a	h	c	a	a	h	c	h	a	a	h	a	h	h	a	h	h	h	h	a	h	a	h	h	h	h	h	h	h	h	h	h	h	a	h	h	h	h	h	c
chr2	AC2B0320	Unigene13921	183	A	G	S	h	h	h	a	h	c	a	a	h	c	h	a	a	h	a	h	h	a	h	h	h	h	a	h	a	h	h	h	h	h	h	h	h	h	h	h	a	h	h	h	h	h	c
chr2	AC2B0320	Unigene28713	1015	C	T	S	h	h	h	a	h	c	a	a	h	c	h	a	a	h	a	h	h	a	h	h	h	h	a	h	a	h	h	h	h	h	h	h	h	h	h	h	a	h	h	h	h	h	c
chr2	AC2B0320	Unigene29205	63	G	A	S	h	h	h	a	h	c	a	a	h	c	h	a	a	h	a	h	h	a	h	h	h	h	a	h	a	h	h	h	h	h	h	h	h	h	h	h	a	h	h	h	h	h	c
chr2	AC2B0330	Unigene3437	115	C	G	S	a	c	h	a	h	c	a	a	h	c	h	a	a	h	a	a	h	a	c	h	h	h	a	h	a	h	h	h	h	h	h	h	h	h	h	a	a	h	h	c	h	h	c
chr2	AC2B0330	Unigene35219	81	A	T	S	a	c	h	a	h	c	a	a	h	c	h	a	a	h	a	a	h	a	c	h	h	h	a	h	a	h	h	h	h	h	h	h	h	h	h	a	a	h	h	c	h	h	c
chr2	AC2B0340	CL4988.Contig1	615	G	T	S	a	c	h	a	h	c	a	a	h	h	h	a	a	h	a	a	h	a	c	h	h	h	a	h	a	h	h	h	h	h	h	h	h	h	h	a	a	h	h	c	h	h	c
chr2	AC2B0350	Unigene26294	111	C	G	S	a	c	h	a	h	c	a	a	h	h	h	a	a	h	a	a	h	a	c	h	h	h	a	h	a	h	h	h	h	a	h	h	h	h	h	a	a	h	h	c	h	h	c
chr2	AC2B0360	Unigene15186	39	G	T	S	a	c	h	a	h	c	a	a	h	h	h	a	a	h	a	a	h	a	c	h	h	h	h	h	a	h	h	h	h	a	h	h	h	h	h	a	a	h	h	c	h	h	c
chr2	AC2B0370	CL155.Contig3	209	G	A	S	a	c	h	a	h	c	a	a	h	h	h	a	a	a	a	a	h	a	c	h	h	h	h	h	a	h	h	h	h	a	h	h	h	h	h	a	a	h	h	c	h	h	c
chr2	AC2B0380	Unigene13439	24	G	A	S	a	c	h	a	h	c	a	a	h	h	h	a	a	a	a	a	h	a	c	h	h	h	h	h	a	h	h	h	h	a	h	h	h	h	h	a	a	h	h	c	h	h	c
chr2	AC2B0380	Unigene21230	414	G	C	S	a	c	h	a	h	c	a	a	h	h	h	a	a	a	a	a	h	a	c	h	h	h	h	h	a	h	h	h	h	a	h	h	h	h	h	a	a	h	h	c	h	h	c
chr2	AC2B0390	CL971.Contig2	682	G	A	S	a	c	h	a	h	c	a	a	h	h	h	h	a	a	a	a	h	a	c	h	h	h	h	c	a	h	h	h	h	a	h	h	h	h	h	a	a	h	h	c	h	h	c
chr2	AC2B0390	Unigene480	191	G	A	S	a	c	h	a	h	c	a	a	h	h	h	h	a	a	a	a	h	a	c	h	h	h	h	c	a	h	h	h	h	a	h	h	h	h	h	a	a	h	h	c	h	h	c
chr2	AC2B0400	CL4886.Contig2	32	C	T	S	a	c	h	a	h	c	a	a	h	h	h	h	a	a	a	a	h	a	c	h	a	h	h	c	a	h	h	h	h	a	h	h	h	h	h	a	a	h	h	c	h	h	c
chr2	AC2B0410	Unigene27596	1725	C	A	S	a	c	h	a	h	c	a	a	h	h	h	h	a	a	a	a	h	a	h	h	a	h	h	c	a	h	h	h	a	a	h	h	h	h	h	a	h	h	h	c	h	h	c
chr2	AC2B0420	Unigene28819	510	C	T	S	a	c	h	a	h	c	a	a	h	h	h	h	a	a	a	a	h	a	h	h	a	h	h	c	a	h	h	h	a	a	h	h	h	h	h	a	h	h	h	c	h	h	c
chr2	AC2B0430	CL6377.Contig1	3790	T	C	S	a	c	h	a	h	c	a	a	h	h	h	h	a	a	a	a	h	a	h	h	a	h	h	c	a	h	h	h	a	a	h	h	h	h	h	a	h	h	h	c	h	h	c
chr2	AC2B0440	Unigene34397	47	C	A	S	a	c	h	a	h	c	a	a	h	h	h	c	a	a	a	a	h	a	h	h	a	a	h	c	a	h	h	h	a	a	h	h	h	h	h	a	h	h	h	c	h	h	c
chr2	AC2B0450	Unigene27337	172	A	G	S	a	c	h	a	h	h	a	h	h	a	h	c	a	a	a	a	h	a	h	h	a	a	h	h	a	h	c	c	a	a	h	h	h	h	h	a	h	h	a	c	h	h	c
chr2	AC2B0460	Unigene9029	92	A	G	S	a	c	h	a	h	h	a	h	h	a	h	c	a	a	a	a	h	a	h	h	a	a	h	h	a	h	c	c	a	a	h	h	h	h	h	a	h	h	a	c	h	h	c
chr2	AC2B0470	CL3654.Contig2	209	A	G	S	a	c	h	a	h	h	a	h	h	a	h	c	a	a	a	a	h	a	h	h	a	a	h	h	a	h	c	c	a	a	h	h	h	h	h	a	h	h	h	c	h	h	c
chr2	AC2B0480	Unigene27749	176	A	G	S	a	c	c	a	h	h	a	h	h	a	h	c	a	a	a	a	h	a	h	a	a	a	h	h	a	h	c	c	a	a	h	h	h	h	h	a	h	h	h	c	h	h	c
chr2	AC2B0490	CL4228.Contig1	505	C	T	S	a	h	c	a	h	h	a	h	h	a	h	c	a	a	a	a	h	a	h	a	a	a	h	h	h	h	c	c	a	a	h	h	h	h	h	a	h	h	h	c	h	h	c
chr2	AC2B0490	Unigene29262	288	T	C	S	a	h	c	a	h	h	a	h	h	a	h	c	a	a	a	a	h	a	h	a	a	a	h	h	h	h	c	c	a	a	h	h	h	h	h	a	h	h	h	c	h	h	c
chr2	AC2B0500	Unigene13410	80	T	C	S	a	h	c	a	h	h	a	h	h	a	h	c	h	a	a	a	h	a	h	a	a	a	h	h	c	h	c	c	a	h	h	h	h	h	h	a	h	h	h	c	h	h	c
chr2	AC2B0510	Unigene27485	166	C	T	S	a	h	c	a	h	h	a	h	h	a	h	c	h	a	a	a	h	a	h	a	a	a	h	h	c	h	c	c	a	h	h	h	h	h	h	a	h	h	h	h	h	h	c
chr2	AC2B0520	Unigene27184	163	C	T	S	a	h	c	a	h	h	a	h	c	a	h	c	h	a	a	a	a	a	a	a	a	h	h	h	c	h	c	c	a	h	h	h	a	h	h	a	h	h	h	h	c	h	c
chr2	AC2B0530	CL4934.Contig3	1812	C	T	S	a	h	c	a	h	h	a	h	c	a	h	c	h	a	a	a	a	a	a	a	a	h	h	h	c	h	c	c	a	a	h	h	a	h	h	a	h	h	h	h	c	h	c
chr2	AC2B0540	Unigene28207	199	A	G	S	a	h	c	a	h	h	a	h	c	a	h	c	h	a	a	a	a	a	a	a	a	h	h	h	c	h	c	c	a	a	h	h	a	h	h	a	h	h	h	h	c	h	c
chr2	AC2B0540	Unigene7001	189	T	C	S	a	h	c	a	h	h	a	h	c	a	h	c	h	a	a	a	a	a	a	a	a	h	h	h	c	h	c	c	a	a	h	h	a	h	h	a	h	h	h	h	c	h	c
chr2	AC2B0550	Unigene5305	394	C	T	S	a	h	c	a	h	h	a	h	c	a	h	c	h	h	a	a	a	a	a	a	a	h	h	h	c	h	c	c	a	a	h	h	a	h	h	a	h	h	h	h	c	h	c
chr2	AC2B0560	Unigene14535	117	T	G	S	a	h	c	a	h	h	a	h	c	a	h	c	h	h	a	a	a	h	h	h	a	h	h	h	c	h	c	c	a	a	h	h	a	h	h	a	h	a	h	h	c	h	c
chr2	AC2B0560	Unigene19156	60	A	T	S	a	h	c	a	h	h	a	h	c	a	h	c	h	h	a	a	a	h	h	h	a	h	h	h	c	h	c	c	a	a	h	h	a	h	h	a	h	a	h	h	c	h	c
chr2	AC2B0570	CL2111.Contig2	128	T	G	S	a	h	c	a	h	h	a	h	c	a	h	c	h	h	a	a	a	h	h	h	a	h	h	h	c	h	c	c	a	a	h	h	a	h	h	a	h	a	h	h	c	h	c
chr2	AC2B0580	Unigene10683	43	G	T	S	a	h	c	h	h	h	a	h	c	a	h	c	h	h	a	a	a	h	h	h	a	h	h	h	c	h	c	c	a	a	h	h	a	h	h	a	h	a	h	h	c	h	c
chr2	AC2B0580	Unigene28706	76	C	T	S	a	h	c	h	h	h	a	h	c	a	h	c	h	h	a	a	a	h	h	h	a	h	h	h	c	h	c	c	a	a	h	h	a	h	h	a	h	a	h	h	c	h	c
chr2	AC2B0580	Unigene22775	61	C	T	S	a	h	c	h	h	h	a	h	c	a	h	c	h	h	a	a	a	h	h	h	a	h	h	h	c	h	c	c	a	a	h	h	a	h	h	a	h	a	h	h	c	h	c
chr2	AC2B0590	Unigene12358	61	C	T	S	a	h	c	h	h	h	a	h	c	a	h	c	h	h	h	a	a	h	h	h	a	h	h	h	c	h	c	c	a	a	h	h	a	h	h	a	h	a	h	h	c	h	c
chr2	AC2B0590	Unigene12659	330	A	T	S	a	h	c	h	h	h	a	h	c	a	h	c	h	h	h	a	a	h	h	h	a	h	h	h	c	h	c	c	a	a	h	h	a	h	h	a	h	a	h	h	c	h	c
chr2	AC2B0590	Unigene13130	67	C	T	S	a	h	c	h	h	h	a	h	c	a	h	c	h	h	h	a	a	h	h	h	a	h	h	h	c	h	c	c	a	a	h	h	a	h	h	a	h	a	h	h	c	h	c
chr2	AC2B0590	Unigene27887	965	G	A	S	a	h	c	h	h	h	a	h	c	a	h	c	h	h	h	a	a	h	h	h	a	h	h	h	c	h	c	c	a	a	h	h	a	h	h	a	h	a	h	h	c	h	c
chr2	AC2B0590	Unigene7942	66	C	G	S	a	h	c	h	h	h	a	h	c	a	h	c	h	h	h	a	a	h	h	h	a	h	h	h	c	h	c	c	a	a	h	h	a	h	h	a	h	a	h	h	c	h	c
chr2	AC2B0600	CL2325.Contig1	109	T	C	S	a	h	c	h	h	c	a	h	c	a	h	c	h	h	h	a	a	h	h	h	a	h	h	h	c	h	c	h	a	a	h	h	a	h	h	a	h	a	h	h	c	h	c
chr2	AC2B0600	Unigene23418	244	T	C	S	a	h	c	h	h	c	a	h	c	a	h	c	h	h	h	a	a	h	h	h	a	h	h	h	c	h	c	h	a	a	h	h	a	h	h	a	h	a	h	h	c	h	c
chr2	AC2B0600	Unigene27267	668	T	C	S	a	h	c	h	h	c	a	h	c	a	h	c	h	h	h	a	a	h	h	h	a	h	h	h	c	h	c	h	a	a	h	h	a	h	h	a	h	a	h	h	c	h	c
chr2	AC2B0610	CL4422.Contig1	262	T	C	S	h	h	c	h	h	c	a	h	c	a	h	c	h	h	h	a	a	h	h	h	a	h	h	h	c	h	c	h	a	a	h	h	a	h	h	a	h	a	h	h	c	h	c
chr2	AC2B0620	Unigene12087	22	A	G	S	h	h	c	h	h	c	a	h	c	a	h	c	h	h	h	a	a	h	h	h	a	h	h	h	c	h	c	h	a	a	h	h	a	h	h	a	h	a	h	h	c	h	c
chr2	AC2B0630	Unigene30063	65	A	T	S	h	h	c	h	h	c	a	h	c	a	h	c	h	h	h	a	a	h	h	h	a	h	h	h	c	h	c	h	a	a	h	h	a	h	h	a	h	a	h	h	c	h	c
chr2	AC2B0640	Unigene28142	2972	G	A	S	h	h	c	h	h	c	a	h	c	a	c	c	h	h	h	a	a	h	h	h	a	h	h	h	c	h	c	h	a	a	h	h	a	h	h	a	h	a	h	h	c	h	c
chr2	AC2B0650	CL4740.Contig1	966	T	C	S	h	h	c	h	h	c	a	h	c	a	h	c	a	h	h	a	a	h	h	h	a	h	h	h	c	a	c	h	a	a	h	c	a	h	h	a	h	a	h	h	c	h	c
chr2	AC2B0650	Unigene23405	175	A	G	S	h	h	c	h	h	c	a	h	c	a	h	c	a	h	h	a	a	h	h	h	a	h	h	h	c	a	c	h	a	a	h	c	a	h	h	a	h	a	h	h	c	h	c
chr2	AC2B0650	Unigene29938	645	G	A	S	h	h	c	h	h	c	a	h	c	a	h	c	a	h	h	a	a	h	h	h	a	h	h	h	c	a	c	h	a	a	h	c	a	h	h	a	h	a	h	h	c	h	c
chr2	AC2B0660	CL6191.Contig1	1257	G	A	S	h	a	c	h	h	c	a	h	c	a	h	c	a	h	h	a	a	h	h	h	h	h	h	h	c	a	c	h	a	a	h	c	a	h	h	a	h	a	h	h	c	h	c
chr2	AC2B0660	Unigene28522	295	G	A	S	h	a	c	h	h	c	a	h	c	a	h	c	a	h	h	a	a	h	h	h	h	h	h	h	c	a	c	h	a	a	h	c	a	h	h	a	h	a	h	h	c	h	c
chr2	AC2B0660	Unigene251	282	G	A	S	h	a	c	h	h	c	a	h	c	a	h	c	a	h	h	a	a	h	h	h	h	h	h	h	c	a	c	h	a	a	h	c	a	h	h	a	h	a	h	h	c	h	c
chr2	AC2B0660	Unigene28128	24	A	G	S	h	a	c	h	h	c	a	h	c	a	h	c	a	h	h	a	a	h	h	h	h	h	h	h	c	a	c	h	a	a	h	c	a	h	h	a	h	a	h	h	c	h	c
chr2	AC2B0670	Unigene3823	102	T	C	S	h	h	c	h	h	c	a	h	c	a	h	c	a	h	h	a	a	h	h	h	h	h	h	h	c	a	c	h	a	a	h	c	a	h	h	a	h	a	h	h	c	h	c
chr2	AC2B0680	Unigene27631	1010	A	G	S	h	h	c	h	a	c	a	h	c	a	a	c	a	h	h	a	a	h	a	h	h	h	h	h	c	a	h	h	a	h	h	c	a	h	a	a	h	a	h	h	c	h	c
chr2	AC2B0690	Unigene30668	151	C	T	S	h	h	c	h	a	c	a	h	c	a	a	c	a	h	h	a	h	h	a	h	h	h	h	h	c	a	h	h	a	h	h	c	a	h	a	a	h	a	h	h	c	h	c
chr3	AC3B0010	Unigene11893	364	A	G	S	a	c	h	h	c	c	h	a	a	a	h	c	h	a	h	h	a	h	h	c	a	a	c	h	h	h	h	h	h	h	h	h	a	h	a	h	c	a	c	h	c	h	c
chr3	AC3B0010	Unigene27910	176	G	A	S	a	c	h	h	c	c	h	a	a	a	h	c	h	a	h	h	a	h	h	c	a	a	c	h	h	h	h	h	h	h	h	h	a	h	a	h	c	a	c	h	c	h	c
chr3	AC3B0020	Unigene19814	271	G	T	S	a	c	c	h	c	c	h	h	a	a	h	c	h	a	h	h	a	h	h	c	a	a	c	h	h	h	h	h	h	h	h	h	a	h	a	h	c	a	c	h	c	h	h
chr3	AC3B0020	Unigene27481	203	T	A	S	a	c	c	h	c	c	h	h	a	a	h	c	h	a	h	h	a	h	h	c	a	a	c	h	h	h	h	h	h	h	h	h	a	h	a	h	c	a	c	h	c	h	h
chr3	AC3B0030	Unigene28183	94	C	T	S	a	c	c	h	c	c	h	h	a	a	h	c	h	a	h	h	a	h	h	c	a	a	c	h	h	h	h	c	h	h	h	h	a	h	a	h	c	a	c	h	c	a	h
chr3	AC3B0040	CL2508.Contig2	448	T	C	S	a	h	c	h	c	c	h	h	a	a	h	c	h	a	h	h	a	h	h	c	a	a	c	h	h	h	h	c	h	h	h	h	a	h	a	h	c	a	c	h	c	a	h
chr3	AC3B0050	Unigene21139	340	C	T	S	a	h	c	h	c	c	h	h	a	a	h	c	h	a	h	h	a	h	h	c	h	a	c	h	h	h	h	c	h	h	h	h	a	h	a	h	h	a	c	h	c	a	h
chr3	AC3B0060	Unigene13974	3344	C	T	S	a	h	c	h	c	c	h	h	a	a	h	c	h	a	h	h	a	h	h	c	h	a	c	h	h	h	h	c	h	h	h	h	a	h	a	h	h	a	c	h	c	a	h
chr3	AC3B0060	Unigene22355	231	C	T	S	a	h	c	h	c	c	h	h	a	a	h	c	h	a	h	h	a	h	h	c	h	a	c	h	h	h	h	c	h	h	h	h	a	h	a	h	h	a	c	h	c	a	h
chr3	AC3B0060	Unigene25495	1349	C	A	S	a	h	c	h	c	c	h	h	a	a	h	c	h	a	h	h	a	h	h	c	h	a	c	h	h	h	h	c	h	h	h	h	a	h	a	h	h	a	c	h	c	a	h
chr3	AC3B0060	Unigene27193	153	G	A	S	a	h	c	h	c	c	h	h	a	a	h	c	h	a	h	h	a	h	h	c	h	a	c	h	h	h	h	c	h	h	h	h	a	h	a	h	h	a	c	h	c	a	h
chr3	AC3B0060	Unigene28071	693	C	T	S	a	h	c	h	c	c	h	h	a	a	h	c	h	a	h	h	a	h	h	c	h	a	c	h	h	h	h	c	h	h	h	h	a	h	a	h	h	a	c	h	c	a	h
chr3	AC3B0060	Unigene28256	81	G	A	S	a	h	c	h	c	c	h	h	a	a	h	c	h	a	h	h	a	h	h	c	h	a	c	h	h	h	h	c	h	h	h	h	a	h	a	h	h	a	c	h	c	a	h
chr3	AC3B0060	Unigene576	497	A	C	S	a	h	c	h	c	c	h	h	a	a	h	c	h	a	h	h	a	h	h	c	h	a	c	h	h	h	h	c	h	h	h	h	a	h	a	h	h	a	c	h	c	a	h
chr3	AC3B0060	Unigene9166	4480	A	G	S	a	h	c	h	c	c	h	h	a	a	h	c	h	a	h	h	a	h	h	c	h	a	c	h	h	h	h	c	h	h	h	h	a	h	a	h	h	a	c	h	c	a	h
chr3	AC3B0070	CL6029.Contig3	723	C	G	S	a	h	c	h	h	c	h	h	a	a	h	c	h	a	h	h	a	h	h	c	h	a	c	h	h	h	h	c	h	h	h	h	a	h	a	h	h	a	c	h	c	a	h
chr3	AC3B0070	Unigene23615	276	A	G	S	a	h	c	h	h	c	h	h	a	a	h	c	h	a	h	h	a	h	h	c	h	a	c	h	h	h	h	c	h	h	h	h	a	h	a	h	h	a	c	h	c	a	h
chr3	AC3B0070	Unigene25012	121	C	T	S	a	h	c	h	h	c	h	h	a	a	h	c	h	a	h	h	a	h	h	c	h	a	c	h	h	h	h	c	h	h	h	h	a	h	a	h	h	a	c	h	c	a	h
chr3	AC3B0070	Unigene27480	500	C	A	S	a	h	c	h	h	c	h	h	a	a	h	c	h	a	h	h	a	h	h	c	h	a	c	h	h	h	h	c	h	h	h	h	a	h	a	h	h	a	c	h	c	a	h
chr3	AC3B0070	Unigene29099	207	A	G	S	a	h	c	h	h	c	h	h	a	a	h	c	h	a	h	h	a	h	h	c	h	a	c	h	h	h	h	c	h	h	h	h	a	h	a	h	h	a	c	h	c	a	h
chr3	AC3B0080	Unigene13773	804	G	A	S	a	h	c	h	h	c	h	h	a	a	h	c	h	a	h	h	a	h	h	c	h	a	c	h	h	h	h	c	h	h	h	h	h	h	a	h	h	a	c	h	c	a	h
chr3	AC3B0080	Unigene26422	648	C	G	S	a	h	c	h	h	c	h	h	a	a	h	c	h	a	h	h	a	h	h	c	h	a	c	h	h	h	h	c	h	h	h	h	h	h	a	h	h	a	c	h	c	a	h
chr3	AC3B0090	CL37.Contig1	841	T	G	S	a	h	c	h	h	c	h	c	a	a	h	c	h	a	h	h	a	h	h	h	h	a	c	h	h	h	h	c	h	h	h	h	h	h	a	h	h	a	c	h	c	a	h
chr3	AC3B0090	Unigene10	657	C	T	S	a	h	c	h	h	c	h	c	a	a	h	c	h	a	h	h	a	h	h	h	h	a	c	h	h	h	h	c	h	h	h	h	h	h	a	h	h	a	c	h	c	a	h
chr3	AC3B0100	Unigene27272	266	G	A	S	a	h	c	h	h	c	h	c	a	a	h	c	h	a	h	h	a	h	h	h	h	a	c	h	h	h	h	c	h	h	h	h	h	h	a	h	h	a	c	h	c	a	h
chr3	AC3B0110	Unigene2796	27	G	T	S	a	h	c	h	h	c	h	c	a	a	h	c	h	a	h	h	a	h	h	h	h	a	c	h	h	h	h	c	h	h	h	h	h	h	a	h	h	a	c	h	c	a	h
chr3	AC3B0120	CL1758.Contig3	362	C	T	S	a	h	c	h	h	c	h	c	a	a	h	c	h	a	h	h	a	h	h	h	h	a	c	h	h	h	h	c	h	h	c	h	h	h	a	h	h	a	c	h	c	a	h
chr3	AC3B0120	Unigene11229	237	G	C	S	a	h	c	h	h	c	h	c	a	a	h	c	h	a	h	h	a	h	h	h	h	a	c	h	h	h	h	c	h	h	c	h	h	h	a	h	h	a	c	h	c	a	h
chr3	AC3B0130	CL1681.Contig1	190	T	C	S	a	h	c	h	h	c	h	c	a	a	h	c	h	a	h	h	a	h	h	h	h	a	c	h	h	h	h	c	h	h	c	h	h	h	a	h	h	a	c	h	c	a	h
chr3	AC3B0140	CL6248.Contig1	17	A	G	S	a	h	c	h	h	c	a	c	a	a	h	c	h	a	h	h	a	h	h	h	h	a	c	h	h	h	h	c	h	h	c	h	h	h	a	h	h	a	c	h	c	a	h
chr3	AC3B0150	CL1976.Contig1	530	T	C	S	a	h	c	h	h	c	a	c	a	a	h	c	h	a	h	h	a	h	h	h	h	a	c	h	h	h	h	c	h	h	c	h	h	h	a	h	h	a	c	h	c	a	h
chr3	AC3B0150	CL472.Contig1	54	A	C	S	a	h	c	h	h	c	a	c	a	a	h	c	h	a	h	h	a	h	h	h	h	a	c	h	h	h	h	c	h	h	c	h	h	h	a	h	h	a	c	h	c	a	h
chr3	AC3B0150	CL5858.Contig1	220	G	A	S	a	h	c	h	h	c	a	c	a	a	h	c	h	a	h	h	a	h	h	h	h	a	c	h	h	h	h	c	h	h	c	h	h	h	a	h	h	a	c	h	c	a	h
chr3	AC3B0150	CL741.Contig1	960	C	T	S	a	h	c	h	h	c	a	c	a	a	h	c	h	a	h	h	a	h	h	h	h	a	c	h	h	h	h	c	h	h	c	h	h	h	a	h	h	a	c	h	c	a	h
chr3	AC3B0150	Unigene21391	180	C	T	S	a	h	c	h	h	c	a	c	a	a	h	c	h	a	h	h	a	h	h	h	h	a	c	h	h	h	h	c	h	h	c	h	h	h	a	h	h	a	c	h	c	a	h
chr3	AC3B0150	Unigene27354	201	T	C	S	a	h	c	h	h	c	a	c	a	a	h	c	h	a	h	h	a	h	h	h	h	a	c	h	h	h	h	c	h	h	c	h	h	h	a	h	h	a	c	h	c	a	h
chr3	AC3B0150	Unigene27841	103	C	G	S	a	h	c	h	h	c	a	c	a	a	h	c	h	a	h	h	a	h	h	h	h	a	c	h	h	h	h	c	h	h	c	h	h	h	a	h	h	a	c	h	c	a	h
chr3	AC3B0160	Unigene13571	774	A	G	S	a	h	c	h	h	c	a	c	a	a	h	c	h	a	h	h	a	h	h	h	h	a	c	h	h	h	h	c	h	h	c	h	h	h	a	h	h	a	c	h	c	a	h
chr3	AC3B0160	Unigene27428	76	G	A	S	a	h	c	h	h	c	a	c	a	a	h	c	h	a	h	h	a	h	h	h	h	a	c	h	h	h	h	c	h	h	c	h	h	h	a	h	h	a	c	h	c	a	h
chr3	AC3B0170	CL1124.Contig1	118	T	A	S	a	h	c	h	h	c	a	c	a	h	h	c	h	a	h	h	a	h	h	h	h	a	c	h	h	h	h	c	h	h	c	h	h	h	a	h	h	a	c	h	c	a	h
chr3	AC3B0170	CL1676.Contig1	341	C	T	S	a	h	c	h	h	c	a	c	a	h	h	c	h	a	h	h	a	h	h	h	h	a	c	h	h	h	h	c	h	h	c	h	h	h	a	h	h	a	c	h	c	a	h
chr3	AC3B0180	Unigene11997	593	A	G	S	a	h	c	h	h	c	a	c	a	h	h	c	h	a	h	h	a	h	h	h	h	a	h	h	h	h	h	c	h	h	c	h	h	h	a	h	h	a	c	h	c	a	h
chr3	AC3B0180	Unigene29208	136	A	T	S	a	h	c	h	h	c	a	c	a	h	h	c	h	a	h	h	a	h	h	h	h	a	h	h	h	h	h	c	h	h	c	h	h	h	a	h	h	a	c	h	c	a	h
chr3	AC3B0180	Unigene8287	983	T	C	S	a	h	c	h	h	c	a	c	a	h	h	c	h	a	h	h	a	h	h	h	h	a	h	h	h	h	h	c	h	h	c	h	h	h	a	h	h	a	c	h	c	a	h
chr3	AC3B0190	Unigene28137	204	T	C	S	a	h	c	h	h	c	a	c	a	h	h	c	h	a	h	h	a	h	h	h	h	a	h	h	h	h	h	c	h	h	c	h	h	c	a	h	h	a	c	h	c	a	h
chr3	AC3B0200	Unigene11572	123	T	C	S	a	h	c	h	h	c	a	c	a	h	h	c	h	a	h	h	a	h	h	h	h	a	h	h	h	h	h	c	h	h	c	h	h	h	a	h	h	a	c	h	c	a	h
chr3	AC3B0200	Unigene8209	132	A	C	S	a	h	c	h	h	c	a	c	a	h	h	c	h	a	h	h	a	h	h	h	h	a	h	h	h	h	h	c	h	h	c	h	h	h	a	h	h	a	c	h	c	a	h
chr3	AC3B0210	CL1582.Contig1	40	G	A	S	h	h	c	h	h	c	a	c	a	h	h	h	h	a	h	h	a	h	h	c	h	a	h	h	h	h	h	c	h	h	c	h	h	h	a	h	h	a	c	h	c	a	h
chr3	AC3B0210	CL1632.Contig1	445	T	C	S	h	h	c	h	h	c	a	c	a	h	h	h	h	a	h	h	a	h	h	c	h	a	h	h	h	h	h	c	h	h	c	h	h	h	a	h	h	a	c	h	c	a	h
chr3	AC3B0210	CL3097.Contig1	25	C	T	S	h	h	c	h	h	c	a	c	a	h	h	h	h	a	h	h	a	h	h	c	h	a	h	h	h	h	h	c	h	h	c	h	h	h	a	h	h	a	c	h	c	a	h
chr3	AC3B0210	Unigene11078	197	C	T	S	h	h	c	h	h	c	a	c	a	h	h	h	h	a	h	h	a	h	h	c	h	a	h	h	h	h	h	c	h	h	c	h	h	h	a	h	h	a	c	h	c	a	h
chr3	AC3B0210	Unigene18803	985	C	T	S	h	h	c	h	h	c	a	c	a	h	h	h	h	a	h	h	a	h	h	c	h	a	h	h	h	h	h	c	h	h	c	h	h	h	a	h	h	a	c	h	c	a	h
chr3	AC3B0210	Unigene27313	577	T	C	S	h	h	c	h	h	c	a	c	a	h	h	h	h	a	h	h	a	h	h	c	h	a	h	h	h	h	h	c	h	h	c	h	h	h	a	h	h	a	c	h	c	a	h
chr3	AC3B0210	Unigene27729	139	A	G	S	h	h	c	h	h	c	a	c	a	h	h	h	h	a	h	h	a	h	h	c	h	a	h	h	h	h	h	c	h	h	c	h	h	h	a	h	h	a	c	h	c	a	h
chr3	AC3B0210	Unigene27767	48	T	C	S	h	h	c	h	h	c	a	c	a	h	h	h	h	a	h	h	a	h	h	c	h	a	h	h	h	h	h	c	h	h	c	h	h	h	a	h	h	a	c	h	c	a	h
chr3	AC3B0210	Unigene27821	138	T	C	S	h	h	c	h	h	c	a	c	a	h	h	h	h	a	h	h	a	h	h	c	h	a	h	h	h	h	h	c	h	h	c	h	h	h	a	h	h	a	c	h	c	a	h
chr3	AC3B0210	Unigene8173	494	A	G	S	h	h	c	h	h	c	a	c	a	h	h	h	h	a	h	h	a	h	h	c	h	a	h	h	h	h	h	c	h	h	c	h	h	h	a	h	h	a	c	h	c	a	h
chr3	AC3B0220	Unigene28501	332	C	T	S	h	h	c	h	h	c	a	c	a	h	h	h	h	a	h	h	a	h	h	c	h	a	h	h	h	h	h	c	h	h	c	h	h	h	a	h	h	a	c	h	c	a	h
chr3	AC3B0220	Unigene4479	271	G	C	S	h	h	c	h	h	c	a	c	a	h	h	h	h	a	h	h	a	h	h	c	h	a	h	h	h	h	h	c	h	h	c	h	h	h	a	h	h	a	c	h	c	a	h
chr3	AC3B0230	Unigene10337	684	A	G	S	h	h	c	h	h	c	a	c	a	h	h	h	h	a	h	h	a	h	h	c	h	a	h	c	h	h	c	c	h	h	c	h	h	a	a	h	h	a	c	h	c	a	h
chr3	AC3B0240	Unigene12513	643	A	G	S	h	h	c	a	h	c	a	c	a	h	h	h	h	a	h	a	a	h	h	c	h	a	h	c	a	h	c	c	h	h	c	h	h	a	a	h	h	a	c	h	c	h	a
chr3	AC3B0240	Unigene12645	1007	A	T	S	h	h	c	a	h	c	a	c	a	h	h	h	h	a	h	a	a	h	h	c	h	a	h	c	a	h	c	c	h	h	c	h	h	a	a	h	h	a	c	h	c	h	a
chr3	AC3B0240	Unigene28517	118	G	A	S	h	h	c	a	h	c	a	c	a	h	h	h	h	a	h	a	a	h	h	c	h	a	h	c	a	h	c	c	h	h	c	h	h	a	a	h	h	a	c	h	c	h	a
chr3	AC3B0250	CL5186.Contig2	416	C	G	S	h	h	c	a	h	c	a	c	a	h	h	h	h	a	h	a	a	h	h	c	h	a	h	c	a	h	c	h	h	h	c	h	h	a	a	h	h	a	c	h	c	h	a
chr3	AC3B0250	CL6712.Contig1	91	A	T	S	h	h	c	a	h	c	a	c	a	h	h	h	h	a	h	a	a	h	h	c	h	a	h	c	a	h	c	h	h	h	c	h	h	a	a	h	h	a	c	h	c	h	a
chr3	AC3B0250	Unigene11721	67	C	T	S	h	h	c	a	h	c	a	c	a	h	h	h	h	a	h	a	a	h	h	c	h	a	h	c	a	h	c	h	h	h	c	h	h	a	a	h	h	a	c	h	c	h	a
chr3	AC3B0250	Unigene4138	158	C	T	S	h	h	c	a	h	c	a	c	a	h	h	h	h	a	h	a	a	h	h	c	h	a	h	c	a	h	h	h	h	h	c	h	h	a	a	h	h	a	c	h	c	h	a
chr3	AC3B0260	Unigene28801	167	T	C	S	h	h	c	a	h	c	a	c	a	h	h	h	h	a	h	a	a	h	h	c	h	a	h	c	a	a	c	h	h	h	c	h	h	a	a	h	h	a	c	h	c	h	a
chr3	AC3B0270	Unigene4684	561	A	G	S	h	h	c	a	h	c	a	c	a	h	h	h	h	a	h	a	a	h	a	c	h	a	h	c	a	a	c	h	h	h	c	h	h	a	a	h	h	a	c	h	c	h	a
chr3	AC3B0280	Unigene10250	456	A	G	S	h	a	c	a	h	c	a	c	a	h	h	h	h	a	h	a	a	h	a	c	h	a	h	c	a	a	c	h	h	h	c	h	h	a	a	h	h	a	c	h	c	h	a
chr3	AC3B0290	CL5415.Contig1	243	G	A	S	h	a	c	a	h	c	a	c	a	h	c	h	h	a	h	a	a	h	a	c	h	a	h	c	a	a	c	h	h	h	c	h	h	a	a	c	h	a	c	h	c	h	a
chr3	AC3B0300	CL5091.Contig2	947	A	T	S	h	a	c	a	h	c	a	c	a	h	c	h	h	h	h	a	a	h	a	c	h	a	h	c	a	a	c	h	h	h	c	h	h	a	a	c	h	a	c	h	c	h	a
chr3	AC3B0300	Unigene10712	690	C	G	S	h	a	c	a	h	h	a	c	a	h	c	h	h	h	h	a	a	h	a	c	h	a	h	c	a	a	c	h	h	h	c	h	h	a	a	c	h	a	c	h	c	h	a
chr3	AC3B0300	Unigene13212	275	G	T	S	h	a	c	a	h	c	a	c	a	h	c	h	h	h	h	a	a	h	a	c	h	a	h	c	a	a	c	h	h	h	c	h	h	a	a	c	h	a	c	h	c	h	a
chr3	AC3B0300	Unigene18026	74	G	A	S	h	a	c	a	h	c	a	c	a	h	c	h	h	h	h	a	a	h	a	c	h	a	h	c	a	a	c	h	h	h	c	h	h	a	a	c	h	a	c	h	c	h	a
chr3	AC3B0300	Unigene21059	76	A	T	S	h	a	c	a	h	c	a	c	a	h	c	h	h	h	h	a	a	h	a	c	h	a	h	c	a	a	c	h	h	h	c	h	h	a	a	c	h	a	c	h	c	h	a
chr3	AC3B0300	Unigene25794	233	C	T	S	h	a	c	a	h	c	a	c	a	h	c	h	h	h	h	a	a	h	a	c	h	a	h	c	a	a	c	h	h	h	c	h	h	a	a	c	h	a	c	h	c	h	a
chr3	AC3B0300	Unigene26366	276	G	C	S	h	a	c	a	h	c	a	c	a	h	c	h	h	h	h	a	a	h	a	c	h	a	h	c	a	a	c	h	h	h	c	h	h	a	a	c	h	a	c	h	c	h	a
chr3	AC3B0300	Unigene29404	17	G	A	S	h	a	c	a	h	c	a	c	a	h	c	h	h	h	h	a	a	h	a	c	h	a	h	c	a	a	c	h	h	h	c	h	h	a	a	c	h	a	c	h	c	h	a
chr3	AC3B0310	Unigene7922	236	G	A	S	h	a	c	a	h	c	a	c	a	h	c	h	h	h	h	a	a	h	a	c	h	a	h	c	a	a	c	h	h	h	c	h	h	a	a	c	h	a	c	h	c	h	a
chr3	AC3B0320	Unigene11490	294	G	T	S	h	a	c	a	h	c	a	c	a	h	c	h	h	h	h	a	a	h	a	c	h	a	h	c	a	a	c	h	h	h	c	h	h	a	a	c	h	a	c	h	c	h	a
chr3	AC3B0330	Unigene10436	204	G	A	S	h	a	c	a	a	c	a	c	a	h	c	h	h	h	h	a	a	h	a	c	h	a	h	c	a	a	h	h	h	h	c	h	h	a	a	c	h	a	c	h	c	c	a
chr3	AC3B0340	CL3550.Contig1	110	G	C	S	h	a	c	a	h	c	h	c	a	h	c	h	h	h	h	a	a	h	a	c	h	a	h	c	a	a	h	h	h	h	c	h	h	a	a	c	h	a	c	h	c	c	a
chr3	AC3B0340	Unigene3999	525	A	T	S	h	a	c	a	h	c	h	c	a	h	c	h	h	h	h	a	a	h	a	c	h	a	h	c	a	a	h	h	h	h	c	h	h	a	a	c	h	a	c	h	c	c	a
chr3	AC3B0350	Unigene12167	502	A	G	S	h	a	c	a	h	c	h	c	a	h	c	h	h	h	c	a	a	h	a	c	h	h	h	c	a	a	h	h	h	h	c	h	h	a	a	c	h	a	c	h	c	c	a
chr3	AC3B0360	Unigene6113	330	G	A	S	h	a	c	a	h	c	h	c	a	h	c	h	h	h	c	a	a	h	a	c	h	c	h	c	a	a	h	h	h	h	c	h	h	a	a	c	h	a	c	h	c	c	a
chr3	AC3B0370	Unigene18243	43	G	A	S	h	a	c	a	h	c	h	c	a	h	c	h	h	h	c	a	a	h	a	c	h	c	h	c	a	a	h	h	h	c	c	h	h	a	a	c	h	a	c	h	c	c	a
chr3	AC3B0380	Unigene10755	763	G	A	S	h	a	c	a	h	c	h	c	a	h	c	h	h	h	c	a	a	h	a	c	h	c	h	c	a	h	h	h	h	c	c	h	h	a	a	c	h	a	c	h	c	c	a
chr3	AC3B0380	Unigene21016	604	A	G	S	h	a	c	a	h	c	h	c	a	h	c	h	h	h	c	a	a	h	a	c	h	c	h	c	a	h	h	h	h	c	c	h	h	a	a	c	h	a	c	h	c	c	a
chr3	AC3B0380	Unigene21052	340	C	T	S	h	a	c	a	h	c	h	c	a	h	c	h	h	h	c	a	a	h	a	c	h	c	h	c	a	h	h	h	h	c	c	h	h	a	a	c	h	a	c	h	c	c	a
chr3	AC3B0390	CL3191.Contig3	405	A	C	S	h	a	c	a	h	c	h	c	a	h	c	h	h	h	c	a	a	h	a	c	h	c	h	c	a	h	h	h	h	c	c	h	h	a	a	c	h	a	c	h	c	c	a
chr3	AC3B0390	Unigene13040	376	C	T	S	h	a	c	a	h	c	h	c	a	h	c	h	h	h	c	a	a	h	a	c	h	c	h	c	a	h	h	h	h	c	c	h	h	a	a	c	h	a	c	h	c	c	a
chr3	AC3B0390	Unigene21140	537	C	T	S	h	a	c	a	h	c	h	c	a	h	c	h	h	h	c	a	a	h	a	c	h	c	h	c	a	h	h	h	h	c	c	h	h	a	a	c	h	a	c	h	c	c	a
chr3	AC3B0390	Unigene726	825	T	C	S	h	a	c	a	h	c	h	c	a	h	c	h	h	h	c	a	a	h	a	c	h	c	h	c	a	h	h	h	h	c	c	h	h	a	a	c	h	a	c	h	c	c	a
chr3	AC3B0400	Unigene11027	112	G	A	S	h	a	c	a	h	c	h	c	a	h	c	h	h	h	c	a	a	h	a	c	h	c	h	c	a	h	h	h	h	c	c	h	h	a	a	c	h	a	c	h	c	c	a
chr3	AC3B0410	CL3312.Contig3	305	G	A	S	h	a	c	a	c	c	h	c	a	h	c	a	h	h	c	a	a	h	a	c	h	c	h	c	a	h	h	h	h	c	c	h	h	a	a	c	h	a	c	h	c	c	a
chr3	AC3B0420	Unigene28918	341	T	C	S	h	a	c	a	c	c	h	c	a	h	c	a	h	h	c	a	a	h	a	c	h	c	h	c	a	h	h	h	h	c	c	h	h	a	a	c	h	a	h	h	c	c	a
chr3	AC3B0430	Unigene11209	87	T	A	S	h	a	c	a	c	c	h	c	a	h	c	h	h	h	c	a	a	h	a	c	h	c	h	c	a	h	h	h	h	c	c	h	h	a	a	c	h	a	h	h	c	c	a
chr3	AC3B0440	Unigene11427	128	G	A	S	h	a	c	a	c	c	h	c	a	h	c	h	h	h	c	a	a	h	a	c	c	c	h	c	a	h	h	h	h	c	c	h	h	a	a	c	h	h	a	h	c	c	a
chr3	AC3B0440	Unigene24203	237	A	G	S	h	a	c	a	c	c	h	c	a	h	c	h	h	h	c	a	a	h	a	c	c	c	h	c	a	h	h	h	h	c	c	h	h	a	a	c	h	h	a	h	c	c	a
chr3	AC3B0440	Unigene28236	454	T	A	S	h	a	c	a	c	c	h	c	a	h	c	h	h	h	c	a	a	h	a	c	c	c	h	c	a	h	h	h	h	c	c	h	h	a	a	c	h	h	a	h	c	c	a
chr3	AC3B0440	Unigene683	1197	A	G	S	h	a	c	a	c	c	h	c	a	h	c	h	h	h	c	a	a	h	a	c	c	c	h	c	a	h	h	h	h	c	c	h	h	a	a	c	h	h	a	h	c	c	a
chr3	AC3B0450	CL1628.Contig3	234	C	T	S	h	a	c	a	c	c	h	c	a	h	c	h	h	h	c	a	a	h	a	c	c	c	h	c	a	h	h	h	h	c	c	h	h	a	a	c	a	h	a	h	h	c	a
chr3	AC3B0460	Unigene30433	17	T	C	S	h	a	c	a	c	c	h	c	a	h	c	h	h	h	c	a	a	h	a	c	c	c	h	c	a	h	h	h	h	c	c	h	h	a	a	c	a	h	a	h	h	c	a
chr3	AC3B0460	Unigene5456	45	A	G	S	h	a	c	a	c	c	h	c	a	h	c	h	h	h	c	a	a	h	a	c	c	c	h	c	a	h	h	h	h	c	c	h	h	a	a	c	a	h	a	h	h	c	a
chr3	AC3B0460	Unigene6330	79	A	G	S	h	a	c	a	c	c	h	c	a	h	c	h	h	h	c	a	a	h	a	c	c	c	h	c	a	h	h	h	h	c	c	h	h	a	a	c	a	h	a	h	h	c	a
chr3	AC3B0470	Unigene11558	513	G	A	S	h	a	c	a	c	c	h	c	a	h	c	h	h	h	c	a	h	h	a	c	c	c	h	c	a	h	h	h	h	c	c	h	h	a	a	c	a	h	a	h	h	c	a
chr3	AC3B0480	Unigene7209	859	C	T	S	h	a	c	a	c	c	h	c	a	h	c	h	h	h	c	a	h	h	a	c	c	c	h	c	a	h	h	h	h	c	c	h	h	a	a	c	h	h	a	h	h	c	a
chr3	AC3B0490	Unigene10069	211	A	T	S	h	a	c	a	c	c	h	c	a	h	h	h	h	h	c	a	h	h	a	c	c	c	h	h	a	h	h	h	h	c	c	h	h	a	a	c	h	h	a	h	h	c	a
chr3	AC3B0490	Unigene18065	91	C	T	S	h	a	c	a	c	c	h	c	a	h	h	h	h	h	c	a	h	h	a	c	c	c	h	h	a	h	h	h	h	c	c	h	h	a	a	c	h	h	a	h	h	c	a
chr3	AC3B0500	Unigene27414	432	G	T	S	h	a	c	a	c	c	h	c	a	h	h	h	h	h	c	a	h	h	a	c	c	c	h	h	a	h	h	h	h	c	c	h	h	a	a	c	h	h	a	h	h	c	a
chr3	AC3B0510	Unigene28953	457	T	G	S	h	a	c	a	c	c	h	h	a	h	h	h	h	h	c	a	h	h	a	c	c	c	h	h	a	h	h	h	h	c	c	h	h	a	a	c	h	h	a	h	h	c	a
chr3	AC3B0520	Unigene31884	830	T	C	S	h	a	c	a	c	c	h	h	a	h	h	h	a	h	c	a	h	h	a	c	c	c	h	h	a	h	h	h	h	c	c	h	h	a	a	c	h	h	a	h	h	c	a
chr3	AC3B0520	Unigene32167	260	C	A	S	h	a	c	a	c	c	h	h	a	h	h	h	a	h	c	a	h	h	a	c	c	c	h	h	a	h	h	h	h	c	c	h	h	a	a	c	h	h	a	h	h	c	a
chr3	AC3B0530	CL4565.Contig2	1513	G	A	S	h	a	c	a	c	h	h	h	a	h	h	h	a	h	c	a	h	h	a	c	c	c	h	h	a	h	h	h	h	c	c	h	h	a	a	c	h	h	a	h	h	c	a
chr3	AC3B0530	Unigene4549	960	T	C	S	h	a	c	a	c	h	h	h	a	h	h	h	a	h	c	a	h	h	a	c	c	c	h	h	a	h	h	h	h	c	c	h	h	a	a	c	h	h	a	h	h	c	a
chr3	AC3B0540	CL5821.Contig2	549	T	C	S	h	a	c	a	c	h	h	h	a	h	h	h	a	h	c	a	h	h	a	c	h	c	h	h	a	h	h	h	h	c	c	c	h	a	a	c	h	h	a	h	h	c	a
chr3	AC3B0540	Unigene27411	594	G	C	S	h	a	c	a	c	h	h	h	a	h	h	h	a	h	c	a	h	h	a	c	h	c	h	h	a	h	h	h	h	c	c	c	h	a	a	c	h	h	a	h	h	c	a
chr3	AC3B0540	Unigene29491	37	G	T	S	h	a	c	a	c	h	h	h	a	h	h	h	a	h	c	a	h	h	a	c	h	c	h	h	a	h	h	h	h	c	c	c	h	a	a	c	h	h	a	h	h	c	a
chr3	AC3B0550	Unigene12739	644	C	T	S	h	a	c	a	c	h	h	h	a	h	h	h	a	h	c	a	h	h	a	c	h	c	h	h	a	h	h	h	h	c	c	c	h	a	a	c	h	h	a	h	h	c	a
chr3	AC3B0550	Unigene27432	335	C	T	S	h	a	c	a	c	h	h	h	a	h	h	h	a	h	c	a	h	h	a	c	h	c	h	h	a	h	h	h	h	c	c	c	h	a	a	c	h	h	a	h	h	c	a
chr3	AC3B0560	CL5176.Contig2	31	C	T	S	h	a	c	a	c	h	h	h	a	a	h	h	a	h	c	a	h	h	a	c	h	c	h	h	a	h	h	h	h	c	c	c	h	a	a	c	h	h	a	h	h	c	a
chr3	AC3B0560	Unigene9996	229	T	A	S	h	a	c	a	c	h	h	h	a	a	h	h	a	h	c	a	h	h	a	c	h	c	h	h	a	h	h	h	h	c	c	c	h	a	a	c	h	h	a	h	h	c	a
chr3	AC3B0570	Unigene27371	444	T	C	S	h	a	c	h	c	h	h	h	a	a	h	h	a	h	c	a	h	h	a	c	h	c	h	h	a	h	h	h	h	c	c	c	h	a	a	c	h	h	a	h	h	c	a
chr3	AC3B0570	Unigene27410	455	C	T	S	h	a	c	h	c	h	h	h	a	a	h	h	a	h	c	a	h	h	a	c	h	c	h	h	a	h	h	h	h	c	c	c	h	a	a	c	h	h	a	h	h	c	a
chr3	AC3B0580	Unigene28745	196	C	T	S	h	a	c	h	h	h	h	h	a	a	h	h	a	h	c	a	h	h	a	c	h	c	h	h	a	h	h	h	h	c	h	c	h	a	a	c	h	h	a	h	h	c	a
chr3	AC3B0590	Unigene11737	480	G	T	S	h	a	c	h	h	h	c	h	a	a	h	h	a	h	c	a	h	h	a	c	h	c	h	h	a	h	h	h	h	c	h	c	h	a	a	c	h	h	a	h	h	c	a
chr3	AC3B0590	Unigene13368	411	G	A	S	h	a	c	h	h	h	c	h	a	a	h	h	a	h	c	a	h	h	a	c	h	c	h	h	a	h	h	h	h	c	h	c	h	a	a	c	h	h	a	h	h	c	a
chr3	AC3B0590	Unigene18726	148	C	G	S	h	a	c	h	h	h	c	h	a	a	h	h	a	h	c	a	h	h	a	c	h	c	h	h	a	h	h	h	h	c	h	c	h	a	a	c	h	h	a	h	h	c	a
chr3	AC3B0590	Unigene18849	188	T	C	S	h	a	c	h	h	h	c	h	a	a	h	h	a	h	c	a	h	h	a	c	h	c	h	h	a	h	h	h	h	c	h	c	h	a	a	c	h	h	a	h	h	c	a
chr3	AC3B0590	Unigene25211	1173	A	G	S	h	a	c	h	h	h	c	h	a	a	h	h	a	h	c	a	h	h	a	c	h	c	h	h	a	h	h	h	h	c	h	c	h	a	a	c	h	h	a	h	h	c	a
chr3	AC3B0600	CL5378.Contig1	212	A	G	S	h	a	c	h	h	h	c	h	a	a	h	h	a	h	c	a	h	h	a	c	h	c	h	h	a	h	h	h	h	c	h	c	h	a	a	c	h	h	a	h	h	c	a
chr3	AC3B0600	CL5589.Contig1	313	T	C	S	h	a	c	h	h	h	c	h	a	a	h	h	a	h	c	a	h	h	a	c	h	c	h	h	a	h	h	h	h	c	h	c	h	a	a	c	h	h	a	h	h	c	a
chr3	AC3B0610	CL356.Contig1	661	A	C	S	h	a	c	h	h	h	c	h	a	a	h	h	a	h	c	a	a	h	a	c	h	c	h	h	a	h	h	h	h	c	h	c	h	a	a	c	h	h	a	a	h	c	a
chr3	AC3B0610	CL4666.Contig2	48	A	G	S	h	a	c	h	h	h	c	h	a	a	h	h	a	h	c	a	a	h	a	c	h	c	h	h	a	h	h	h	h	c	h	c	h	a	a	c	h	h	a	a	h	c	a
chr3	AC3B0620	CL4469.Contig2	274	A	G	S	h	a	c	h	h	h	c	h	a	a	h	c	a	h	c	a	a	h	a	c	h	c	h	h	a	h	h	h	h	c	h	c	h	a	h	h	h	h	a	a	h	c	a
chr3	AC3B0630	Unigene12442	418	T	A	S	h	a	c	h	h	h	c	h	a	a	h	c	a	h	c	a	a	h	a	c	a	c	a	h	a	h	h	h	h	c	h	c	c	a	h	h	h	h	a	a	h	c	a
chr3	AC3B0640	Unigene28275	289	A	G	S	h	a	c	h	h	h	c	h	a	a	h	c	a	h	c	a	a	h	h	c	a	c	a	h	a	h	h	h	h	c	h	c	c	a	h	h	h	h	h	a	h	c	a
chr3	AC3B0640	Unigene9042	209	C	T	S	h	a	c	h	h	h	c	h	a	a	h	c	a	h	c	a	a	h	h	c	a	c	a	h	a	h	h	h	h	c	h	c	c	a	h	h	h	h	h	a	h	c	a
chr3	AC3B0650	Unigene24610	181	A	G	S	h	a	c	h	h	h	c	h	a	a	h	c	a	h	c	a	a	h	h	c	a	c	a	h	a	h	h	h	h	c	h	c	c	a	h	h	h	h	h	a	h	c	a
chr3	AC3B0660	Unigene28939	939	A	G	S	h	a	c	h	h	h	c	h	a	a	h	c	a	h	c	a	a	h	h	c	a	c	a	h	a	h	h	h	h	c	h	c	c	a	h	h	h	h	h	a	h	h	a
chr3	AC3B0670	CL6120.Contig2	638	A	G	S	h	h	c	h	h	h	c	h	a	a	h	c	a	h	h	a	a	h	h	c	a	c	a	h	a	h	h	h	h	c	h	c	c	a	h	h	h	a	h	a	h	h	a
chr3	AC3B0680	Unigene8769	383	G	A	S	h	h	c	h	h	h	c	h	a	a	h	c	a	h	h	a	a	h	h	h	a	c	a	h	a	h	h	h	h	c	h	c	c	a	h	h	h	h	h	a	h	h	a
chr3	AC3B0690	Unigene27409	656	C	A	S	h	h	c	h	h	h	c	h	a	a	h	c	a	h	h	a	a	h	h	h	a	c	a	h	a	h	h	h	h	c	h	c	c	a	h	h	h	a	h	a	h	h	a
chr3	AC3B0690	CL2104.Contig1	862	T	C	S	h	h	c	h	h	h	c	h	a	a	h	c	a	h	h	a	a	h	h	h	a	c	a	h	a	h	h	h	h	c	h	c	c	a	h	h	h	a	h	a	h	h	h
chr3	AC3B0700	CL1476.Contig2	1181	T	C	S	h	h	c	h	h	h	c	h	a	a	h	c	a	h	h	a	a	h	h	h	a	c	a	h	a	h	h	h	h	c	h	c	c	a	h	h	h	a	h	a	h	h	h
chr3	AC3B0700	Unigene13259	1199	C	G	S	h	h	c	h	h	h	c	h	a	a	h	c	a	h	h	a	a	h	h	h	a	c	a	h	a	h	h	h	h	c	h	c	c	a	h	h	h	a	h	a	h	h	h
chr3	AC3B0700	Unigene18469	177	G	A	S	h	h	c	h	h	h	c	h	a	a	h	c	a	h	h	a	a	h	h	h	a	c	a	h	a	h	h	h	h	c	h	c	c	a	h	h	h	a	h	a	h	h	h
chr3	AC3B0700	Unigene25046	198	G	A	S	h	h	c	h	h	h	c	h	a	a	h	c	a	h	h	a	a	h	h	h	a	c	a	h	a	h	h	h	h	c	h	c	c	a	h	h	h	a	h	a	h	h	h
chr3	AC3B0710	Unigene27507	488	C	T	S	h	h	c	h	h	h	c	h	a	a	h	c	a	h	a	a	a	h	h	h	a	c	a	h	a	h	h	h	h	c	h	c	c	a	h	h	h	a	h	a	h	h	h
chr3	AC3B0720	CL3294.Contig1	679	A	T	S	h	h	c	h	h	h	h	h	a	a	h	c	a	h	a	a	a	h	h	h	a	c	a	h	a	h	h	h	h	c	h	c	c	a	h	h	h	a	h	a	h	h	h
chr3	AC3B0720	Unigene13553	124	C	T	S	h	h	c	h	h	h	h	h	a	a	h	c	a	h	a	a	a	h	h	h	a	c	a	h	a	h	h	h	h	c	h	c	c	a	h	h	h	a	h	a	h	h	h
chr3	AC3B0730	CL1017.Contig1	3022	T	G	S	h	h	c	h	h	h	h	h	a	a	h	c	a	h	a	a	a	h	h	h	a	c	a	h	a	h	h	h	h	c	h	c	c	a	h	h	h	a	h	a	h	h	h
chr3	AC3B0730	CL1142.Contig1	456	C	A	S	h	h	c	h	h	h	h	h	a	a	h	c	a	h	a	a	a	h	h	h	a	c	a	h	a	h	h	h	h	c	h	c	c	a	h	h	h	a	h	a	h	h	h
chr3	AC3B0730	CL4694.Contig2	143	G	T	S	h	h	c	h	h	h	h	h	a	a	h	c	a	h	a	a	a	h	h	h	a	c	a	h	a	h	h	h	h	c	h	c	c	a	h	h	h	a	h	a	h	h	h
chr3	AC3B0730	CL472.Contig3	1916	G	A	S	h	h	c	h	h	h	h	h	a	a	h	c	a	h	a	a	a	h	h	h	a	c	a	h	a	h	h	h	h	c	h	c	c	a	h	h	h	a	h	a	h	h	h
chr3	AC3B0730	Unigene27574	38	A	C	S	h	h	c	h	h	h	h	h	a	a	h	c	a	h	a	a	a	h	h	h	a	c	a	h	a	h	h	h	h	c	h	c	c	a	h	h	h	a	h	a	h	h	h
chr3	AC3B0730	Unigene7668	97	C	T	S	h	h	c	h	h	h	h	h	a	a	h	c	a	h	a	a	a	h	h	h	a	c	a	h	a	h	h	h	h	c	h	c	c	a	h	h	h	a	h	a	h	h	h
chr3	AC3B0740	CL5024.Contig2	1094	G	A	S	h	h	c	h	h	h	h	h	a	a	h	c	a	h	a	a	a	h	h	h	a	c	a	h	a	h	h	h	h	c	h	c	c	a	h	h	c	a	h	a	h	h	h
chr3	AC3B0740	Unigene27345	243	A	G	S	h	h	c	h	h	h	h	h	a	a	h	c	a	h	a	a	a	h	h	h	a	c	a	h	a	h	h	h	h	c	h	c	c	a	h	h	c	a	h	a	h	h	h
chr3	AC3B0750	CL5424.Contig2	143	C	T	S	h	h	c	h	h	h	h	h	a	a	h	c	a	h	a	a	a	h	h	h	a	c	a	h	a	h	h	h	h	c	h	c	c	a	h	h	c	a	h	a	h	h	h
chr3	AC3B0750	CL5497.Contig1	841	C	T	S	h	h	c	h	h	h	h	h	a	a	h	c	a	h	a	a	a	h	h	h	a	c	a	h	a	h	h	h	h	c	h	c	c	a	h	h	c	a	h	a	h	h	h
chr3	AC3B0750	Unigene27230	570	C	T	S	h	h	c	h	h	h	h	h	a	a	h	c	a	h	a	a	a	h	h	h	a	c	a	h	a	h	h	h	h	c	h	c	c	a	h	h	c	a	h	a	h	h	h
chr3	AC3B0750	Unigene27610	79	G	A	S	h	h	c	h	h	h	h	h	a	a	h	c	a	h	a	a	a	h	h	h	a	c	a	h	a	h	h	h	h	c	h	c	c	a	h	h	c	a	h	a	h	h	h
chr3	AC3B0760	Unigene25380	1116	C	T	S	h	h	c	h	h	h	h	h	a	a	h	c	a	c	a	a	a	h	h	h	a	c	a	h	a	h	h	h	h	c	h	c	c	a	h	h	c	a	h	a	h	h	h
chr3	AC3B0760	Unigene27590	122	C	T	S	h	h	c	h	h	h	h	h	a	a	h	c	a	c	a	a	a	h	h	h	a	c	a	h	a	h	h	h	h	c	h	c	c	a	h	h	c	a	h	a	h	h	h
chr3	AC3B0750	Unigene27905	84	T	A	S	h	h	c	h	h	h	h	h	a	a	h	c	a	c	a	a	a	h	h	h	a	c	a	h	a	h	h	h	h	c	h	c	c	a	h	h	c	a	h	a	h	h	h
chr3	AC3B0750	Unigene7758	83	A	T	S	h	h	c	h	h	h	h	h	a	a	h	c	a	h	a	a	a	h	h	h	a	c	a	h	a	h	h	h	h	c	h	c	c	a	h	h	c	a	h	a	h	h	h
chr3	AC3B0760	Unigene11392	706	G	A	S	h	h	c	h	h	h	h	h	a	a	h	c	a	c	a	a	a	h	h	h	a	c	a	h	a	h	h	h	h	c	h	c	c	a	h	h	c	a	h	a	h	h	h
chr3	AC3B0770	Unigene12038	136	G	C	S	h	h	c	h	h	h	h	h	a	a	a	c	a	c	a	a	a	h	h	h	a	c	a	h	a	h	h	h	h	c	h	c	c	a	h	h	c	h	h	a	h	h	h
chr3	AC3B0770	Unigene27569	389	A	G	S	h	h	c	h	h	h	h	h	a	a	a	c	a	c	a	a	a	h	h	h	a	c	a	h	a	h	h	h	h	c	h	c	c	a	h	h	c	h	h	a	h	h	h
chr3	AC3B0770	Unigene6236	481	A	G	S	h	h	c	h	h	h	h	h	a	a	a	c	a	c	a	a	a	h	h	h	a	c	a	h	a	h	h	h	h	c	h	c	c	a	h	h	c	h	h	a	h	h	h
chr3	AC3B0780	Unigene12104	518	A	G	S	h	h	h	h	h	h	h	h	a	a	a	c	a	c	a	a	a	h	h	h	a	c	a	h	a	h	h	h	h	c	h	c	c	a	h	h	c	h	h	a	h	h	h
chr3	AC3B0790	Unigene10635	1153	A	G	S	h	h	h	h	h	h	h	h	a	a	a	c	a	c	a	a	h	h	h	h	a	c	a	h	a	h	h	h	h	c	h	c	c	a	h	h	c	h	h	a	h	h	h
chr3	AC3B0800	Unigene19985	183	T	C	S	h	h	h	h	h	h	h	h	a	a	a	c	a	c	a	a	h	h	h	h	a	c	a	h	a	h	h	h	h	c	h	c	c	a	h	h	c	h	h	a	h	h	h
chr3	AC3B0800	Unigene19987	321	T	C	S	h	h	h	h	h	h	h	h	a	a	a	c	a	c	a	a	h	h	h	h	a	c	a	h	a	h	h	h	h	c	h	c	c	a	h	h	c	h	h	a	h	h	h
chr3	AC3B0800	Unigene28563	623	C	T	S	h	h	h	h	h	h	h	h	a	a	a	c	a	c	a	a	h	h	h	h	a	c	a	h	a	h	h	h	h	c	h	c	c	a	h	h	c	h	h	a	h	h	h
chr3	AC3B0800	Unigene31771	27	A	G	S	h	h	h	h	h	h	h	h	a	a	a	c	a	c	a	a	h	h	h	h	a	c	a	h	a	h	h	h	h	c	h	c	c	a	h	h	c	h	h	a	h	h	h
chr3	AC3B0810	CL3328.Contig1	620	C	T	S	h	h	h	h	a	h	h	h	a	a	a	c	a	c	a	a	h	h	h	h	a	c	a	h	a	h	h	h	h	c	h	c	c	a	h	h	c	h	h	a	h	h	h
chr3	AC3B0810	Unigene13702	651	G	A	S	h	h	h	h	a	h	h	h	a	a	a	c	a	c	a	a	h	h	h	h	a	c	a	h	a	h	h	h	h	c	h	c	c	a	h	h	c	h	h	a	h	h	h
chr3	AC3B0820	CL6638.Contig2	510	A	C	S	h	h	h	h	a	h	h	h	a	a	a	c	a	c	a	a	h	h	c	h	a	c	a	h	a	h	h	h	a	c	h	c	c	a	h	h	c	h	h	a	h	c	h
chr3	AC3B0820	Unigene12928	147	G	A	S	h	h	h	h	a	h	h	h	a	a	a	c	a	c	a	a	h	h	c	h	a	c	a	h	a	h	h	h	a	c	h	c	c	a	h	h	c	h	h	a	h	c	h
chr3	AC3B0820	Unigene25746	112	C	T	S	h	h	h	h	a	h	h	h	a	a	a	c	a	c	a	a	h	h	c	h	a	c	a	h	a	h	h	h	a	c	h	c	c	a	h	h	c	h	h	a	h	c	h
chr3	AC3B0820	Unigene32135	318	G	A	S	h	h	h	h	a	h	h	h	a	a	a	c	a	c	a	a	h	h	c	h	a	c	a	h	a	h	h	h	a	c	h	c	c	a	h	h	c	h	h	a	h	c	h
chr3	AC3B0820	Unigene627	346	T	C	S	h	h	h	h	a	h	h	h	a	a	a	c	a	c	a	a	h	h	c	h	a	c	a	h	a	h	h	h	a	c	h	c	c	a	h	h	c	h	h	a	h	c	h
chr3	AC3B0820	Unigene9529	850	A	G	S	h	h	h	h	a	h	h	h	a	a	a	c	a	c	a	a	h	h	c	h	a	c	a	h	a	h	h	h	a	c	h	c	c	a	h	h	c	h	h	a	h	c	h
chr3	AC3B0820	Unigene9530	690	A	T	S	h	h	h	h	a	h	h	h	a	a	a	c	a	c	a	a	h	h	c	h	a	c	a	h	a	h	h	h	a	c	h	c	c	a	h	h	c	h	h	a	h	c	h
chr3	AC3B0830	CL6717.Contig1	161	C	T	S	h	h	h	h	a	h	h	h	a	a	a	c	a	c	a	a	h	h	c	h	a	h	a	h	a	h	h	h	a	c	h	c	c	a	h	h	c	h	h	a	h	c	h
chr3	AC3B0830	Unigene12896	879	C	A	S	h	h	h	h	a	h	h	h	a	a	a	c	a	c	a	a	h	h	c	h	a	h	a	h	a	h	h	h	a	c	h	c	c	a	h	h	c	h	h	a	h	c	h
chr3	AC3B0840	Unigene13709	428	T	C	S	h	h	h	h	a	h	h	h	a	a	a	c	a	c	a	a	h	h	c	h	a	h	a	h	a	h	h	h	a	c	h	c	c	a	h	h	c	h	h	a	h	c	h
chr3	AC3B0850	Unigene21007	1462	G	T	S	h	h	h	h	a	h	h	h	a	a	a	c	a	c	a	a	h	h	c	h	a	h	a	h	a	h	h	h	a	c	h	c	c	a	h	h	c	h	h	a	h	c	h
chr3	AC3B0850	Unigene28212	42	T	C	S	h	h	h	h	a	h	h	h	a	a	a	c	a	c	a	a	h	h	c	h	a	h	a	h	a	h	h	h	a	c	h	c	c	a	h	h	c	h	h	a	h	c	h
chr3	AC3B0850	Unigene35954	138	C	T	S	h	h	h	h	a	h	h	h	a	a	a	c	a	c	a	a	h	h	c	h	a	h	a	h	a	h	h	h	a	c	h	c	c	a	h	h	c	h	h	a	h	c	h
chr3	AC3B0860	CL4072.Contig1	658	A	G	S	h	h	h	h	a	h	h	h	a	a	a	c	a	c	a	a	h	a	c	h	a	h	a	h	a	h	h	h	a	c	h	c	c	a	h	h	c	h	h	a	h	c	h
chr3	AC3B0860	Unigene22675	285	C	A	S	h	h	h	h	a	h	h	h	a	a	a	c	a	c	a	a	h	a	c	h	a	h	a	h	a	h	h	h	a	c	h	c	c	a	h	h	c	h	h	a	h	c	h
chr3	AC3B0860	Unigene28170	364	C	A	S	h	h	h	h	a	h	h	h	a	a	a	c	a	c	a	a	h	a	c	h	a	h	a	h	a	h	h	h	a	c	h	c	c	a	h	h	c	h	h	a	h	c	h
chr3	AC3B0870	Unigene27794	126	T	C	S	h	h	h	h	a	h	h	h	a	a	a	c	a	c	a	a	h	a	c	h	a	h	a	h	a	a	h	h	a	c	h	c	c	a	h	h	c	h	h	a	h	c	h
chr3	AC3B0870	Unigene28534	774	A	T	S	h	h	h	h	a	h	h	h	a	a	a	c	a	c	a	a	h	a	c	h	a	h	a	h	a	a	h	h	a	c	h	c	c	a	h	h	c	h	h	a	h	c	h
chr3	AC3B0870	Unigene29180	279	C	T	S	h	h	h	h	a	h	h	h	a	a	a	c	a	c	a	a	h	a	c	h	a	h	a	h	a	a	h	h	a	c	h	c	c	a	h	h	c	h	h	a	h	c	h
chr3	AC3B0870	Unigene29277	701	T	C	S	h	h	h	h	a	h	h	h	a	a	a	c	a	c	a	a	h	a	c	h	a	h	a	h	a	a	h	h	a	h	h	c	c	a	h	h	c	h	h	a	h	c	h
chr4	AC4B0010	Unigene15671	59	A	T	S	c	a	a	h	h	h	c	h	a	a	c	h	h	h	h	a	h	h	a	a	h	h	h	a	a	h	h	a	h	h	h	h	c	h	h	h	h	h	h	a	h	c	c
chr4	AC4B0020	Unigene22416	2006	G	C	S	c	a	a	h	h	h	c	h	a	a	c	h	h	h	h	a	h	h	a	a	h	h	h	a	a	h	h	a	h	h	h	h	c	h	h	h	h	h	h	a	h	c	c
chr4	AC4B0030	CL2253.Contig1	88	A	G	S	c	a	a	h	h	h	c	h	a	a	c	h	h	h	h	a	h	h	a	a	h	h	h	a	h	h	h	a	h	h	h	h	c	h	h	h	h	h	h	a	h	c	c
chr4	AC4B0030	Unigene17409	258	T	A	S	c	a	a	h	h	h	c	h	a	a	c	h	h	h	h	a	h	h	a	a	h	h	h	a	h	h	h	a	h	h	h	h	c	h	h	h	h	h	h	a	h	c	c
chr4	AC4B0040	Unigene7928	339	G	A	S	c	a	a	a	h	h	c	h	a	a	c	h	h	h	h	a	h	h	a	a	h	h	h	a	c	h	h	h	h	h	h	h	c	h	h	h	h	h	h	a	h	c	c
chr4	AC4B0050	Unigene13589	419	C	G	S	c	a	a	a	c	h	c	h	h	a	c	h	h	h	h	a	h	h	a	a	h	h	h	a	c	h	h	h	h	h	h	h	c	h	h	h	h	h	h	a	h	c	c
chr4	AC4B0060	CL5858.Contig2	599	T	A	S	c	h	a	a	c	h	h	h	h	a	c	h	h	h	h	a	h	h	a	a	h	h	h	a	c	h	h	h	h	h	h	h	c	h	h	h	h	h	h	a	h	c	c
chr4	AC4B0070	CL4457.Contig1	156	A	C	S	c	h	a	a	c	h	h	h	h	a	c	h	h	h	h	a	h	h	a	a	h	h	h	a	c	h	h	h	h	h	h	h	c	h	h	h	h	h	h	a	h	c	c
chr4	AC4B0070	Unigene24359	2058	G	A	S	c	h	a	a	c	h	h	h	h	a	c	h	h	h	h	a	h	h	a	a	h	h	h	a	c	h	h	h	h	h	h	h	c	h	h	h	h	h	h	a	h	c	c
chr4	AC4B0080	Unigene10147	344	A	G	S	c	h	a	a	c	h	h	h	h	a	c	h	h	h	h	a	h	h	a	h	h	h	a	a	c	h	h	h	h	a	h	h	c	h	h	h	h	h	h	a	a	c	c
chr4	AC4B0080	Unigene11378	160	C	A	S	c	h	a	a	c	h	h	h	h	a	c	h	h	h	h	a	h	h	a	h	h	h	a	a	c	h	h	h	h	a	h	h	c	h	h	h	h	h	h	a	a	c	c
chr4	AC4B0080	Unigene25232	254	T	C	S	c	h	a	a	c	h	h	h	h	a	c	h	h	h	h	a	h	h	a	h	h	h	a	a	c	h	h	h	h	a	h	h	c	h	h	h	h	h	h	a	a	c	c
chr4	AC4B0090	Unigene9764	501	G	A	S	c	h	a	a	c	h	h	h	h	a	c	h	h	h	h	a	h	h	a	h	h	h	a	a	c	h	h	h	h	a	h	h	c	h	h	h	h	h	h	a	a	c	c
chr4	AC4B0100	Unigene13261	123	G	A	S	c	h	h	a	c	h	h	h	h	a	c	h	h	h	h	a	h	h	a	h	h	h	a	a	c	h	h	h	h	a	h	h	c	h	h	h	h	h	h	a	a	c	c
chr4	AC4B0110	Unigene27344	166	G	A	S	c	h	h	a	c	h	h	h	h	a	c	h	h	h	h	a	h	h	a	h	h	h	a	a	c	h	h	h	h	a	h	h	c	h	h	h	h	h	h	a	a	c	c
chr4	AC4B0110	Unigene27490	1485	G	A	S	c	h	h	a	c	h	h	h	h	a	c	h	h	h	h	a	h	h	a	h	h	h	a	a	c	h	h	h	h	a	h	h	c	h	h	h	h	h	h	a	a	c	c
chr4	AC4B0120	Unigene10602	909	A	G	S	c	h	h	a	c	a	h	h	h	a	c	h	h	h	h	a	h	h	a	h	h	h	a	a	c	h	h	h	h	a	h	h	c	a	h	h	h	h	h	a	a	c	c
chr4	AC4B0120	Unigene27617	342	G	C	S	c	h	h	a	c	a	h	h	h	a	c	h	h	h	h	a	h	h	a	h	h	h	a	a	c	h	h	h	h	a	h	h	c	a	h	h	h	h	h	a	a	c	c
chr4	AC4B0130	CL4025.Contig1	102	A	G	S	c	h	h	a	c	a	h	h	h	a	c	h	h	h	h	a	h	h	a	c	h	h	a	a	c	h	a	h	h	a	h	h	c	a	h	h	h	h	h	a	a	c	c
chr4	AC4B0140	Unigene13827	457	G	A	S	c	h	h	a	c	a	h	h	h	a	c	h	h	h	h	a	h	h	a	c	h	h	a	a	c	h	a	h	h	a	h	h	c	a	h	h	h	h	h	a	a	c	c
chr4	AC4B0140	Unigene21001	499	C	T	S	c	h	h	a	c	a	h	h	h	a	c	h	h	h	h	a	h	h	a	c	h	h	a	a	c	h	a	h	h	a	h	h	c	a	h	h	h	h	h	a	a	c	c
chr4	AC4B0140	Unigene22317	79	C	T	S	c	h	h	a	c	a	h	h	h	a	c	h	h	h	h	a	h	h	a	c	h	h	a	a	c	h	a	h	h	a	h	h	c	a	h	h	h	h	h	a	a	c	c
chr4	AC4B0150	CL1797.Contig2	649	A	G	S	c	h	h	a	c	a	h	h	h	a	c	h	h	h	h	a	h	h	a	c	h	h	a	a	c	h	a	h	h	a	h	h	c	a	c	h	h	h	h	a	a	c	c
chr4	AC4B0150	CL2538.Contig2	595	G	T	S	c	h	h	a	c	a	h	h	h	a	c	h	h	h	h	a	h	h	a	c	h	h	a	a	c	h	a	h	h	a	h	h	c	a	c	h	h	h	h	a	a	c	c
chr4	AC4B0150	Unigene29846	235	T	C	S	c	h	h	a	c	a	h	h	h	a	c	h	h	h	h	a	h	h	a	c	h	h	a	a	c	h	a	h	h	a	h	h	c	a	c	h	h	h	h	a	a	c	c
chr4	AC4B0150	Unigene30347	96	C	T	S	c	h	h	a	c	a	h	h	h	a	c	h	h	h	h	a	h	h	a	c	h	h	a	a	c	h	a	h	h	a	h	h	c	a	c	h	h	h	h	a	a	c	c
chr4	AC4B0160	CL3088.Contig1	259	G	A	S	h	h	h	a	c	a	h	h	h	a	c	h	h	h	h	a	h	h	a	c	h	h	a	a	c	h	a	h	h	a	h	h	c	a	c	h	h	h	h	a	a	h	c
chr4	AC4B0160	Unigene27213	162	G	A	S	h	h	h	a	c	a	h	h	h	a	c	h	h	h	h	a	h	h	a	c	h	h	a	a	c	h	a	h	h	a	h	h	c	a	c	h	h	h	h	a	a	h	c
chr4	AC4B0170	Unigene1030	107	A	G	S	h	h	h	a	c	a	h	h	h	a	c	h	h	h	h	a	h	h	a	c	h	h	a	a	c	h	a	h	h	h	h	h	h	a	c	h	h	h	h	a	a	h	c
chr4	AC4B0170	Unigene13646	264	C	T	S	h	h	h	a	c	a	h	h	h	a	c	h	h	h	h	a	h	h	a	c	h	h	a	a	c	h	a	h	h	h	h	h	h	a	c	h	h	h	h	a	a	h	c
chr4	AC4B0180	Unigene29219	287	A	C	S	h	h	h	a	c	a	h	h	h	a	c	h	h	h	h	a	h	h	a	c	h	h	a	a	c	h	a	h	h	h	h	h	h	a	c	h	h	h	h	a	a	h	c
chr4	AC4B0180	Unigene34351	92	A	G	S	h	h	h	a	c	a	h	h	h	a	c	h	h	h	h	a	h	h	a	c	h	h	a	a	c	h	a	h	h	h	h	h	h	a	c	h	h	h	h	a	a	h	c
chr4	AC4B0180	Unigene4971	218	C	T	S	h	h	h	a	c	a	h	h	h	a	c	h	h	h	h	a	h	h	a	c	h	h	a	a	c	h	a	h	h	h	h	h	h	a	c	h	h	h	h	a	a	h	c
chr4	AC4B0180	Unigene7629	919	G	A	S	h	h	h	a	c	a	h	h	h	a	c	h	h	h	h	a	h	h	a	c	h	h	a	a	c	h	a	h	h	h	h	h	h	a	c	h	h	h	h	a	a	h	c
chr4	AC4B0190	Unigene28324	708	G	A	S	h	h	h	a	c	a	h	h	h	a	c	h	h	a	h	a	h	h	a	c	h	h	a	a	c	h	a	h	h	h	h	h	h	a	c	h	h	h	h	a	a	h	c
chr4	AC4B0200	Unigene10208	204	G	A	S	h	h	h	a	c	a	h	h	h	a	c	h	h	a	h	a	h	h	a	c	h	h	a	a	c	h	a	h	h	h	h	h	h	a	c	h	h	h	h	a	a	h	c
chr4	AC4B0210	Unigene13493	241	G	A	S	h	h	h	a	c	a	h	h	h	a	h	h	h	a	h	a	h	h	a	c	h	h	a	a	c	h	a	h	h	h	h	h	h	a	c	h	h	h	h	a	a	h	c
chr4	AC4B0210	Unigene27419	104	A	G	S	h	h	h	a	c	a	h	h	h	a	h	h	h	a	h	a	h	h	a	c	h	h	a	a	c	h	a	h	h	h	h	h	h	a	c	h	h	h	h	a	a	h	c
chr4	AC4B0210	Unigene28809	1083	G	T	S	h	h	h	a	c	a	h	h	h	a	h	h	h	a	h	a	h	h	a	c	h	h	a	a	c	h	a	h	h	h	h	h	h	a	c	h	h	h	h	a	a	h	c
chr4	AC4B0210	Unigene9039	142	G	A	S	h	h	h	a	c	a	h	h	h	a	h	h	h	a	h	a	h	h	a	c	h	h	a	a	c	h	a	h	h	h	h	h	h	a	c	h	h	h	h	a	a	h	c
chr4	AC4B0220	Unigene13821	648	G	C	S	h	h	h	a	c	a	h	h	h	a	h	h	h	a	h	a	h	h	a	c	h	h	a	a	c	h	a	h	h	h	h	h	h	a	c	h	a	h	h	h	a	h	c
chr4	AC4B0230	CL639.Contig8	815	C	T	S	h	h	h	a	c	a	h	h	h	a	h	h	h	a	h	a	h	h	a	c	h	h	a	a	c	h	a	h	h	h	h	h	h	a	c	h	a	h	h	h	a	h	c
chr4	AC4B0230	Unigene12567	609	C	T	S	h	h	h	a	c	a	h	h	h	a	h	h	h	a	h	a	h	h	a	c	h	h	a	a	c	h	a	h	h	h	h	h	h	a	c	h	a	h	h	h	a	h	c
chr4	AC4B0240	Unigene24451	142	A	C	S	h	h	h	a	c	a	h	h	h	a	h	h	h	a	h	a	h	h	a	c	h	h	a	a	c	h	a	h	h	h	h	h	h	a	c	h	a	h	h	h	a	h	c
chr4	AC4B0250	CL486.Contig4	708	C	T	S	h	h	h	a	c	a	h	h	c	a	h	h	h	a	h	a	h	h	a	c	h	h	a	a	c	a	a	h	h	h	h	h	h	a	c	h	a	h	h	h	a	h	c
chr4	AC4B0250	Unigene23935	270	T	C	S	h	h	h	a	c	a	h	h	c	a	h	h	h	a	h	a	h	h	a	c	h	h	a	a	c	a	a	h	h	h	h	h	h	a	c	h	a	h	h	h	a	h	c
chr4	AC4B0260	CL2756.Contig2	703	T	C	S	h	h	h	a	c	a	h	h	c	a	h	h	h	a	h	a	h	h	a	c	h	h	a	a	c	a	a	h	h	h	h	h	h	a	c	h	a	h	h	h	a	h	c
chr4	AC4B0260	CL3003.Contig1	271	G	C	S	h	h	h	a	c	a	h	h	c	a	h	h	h	a	h	a	h	h	a	c	h	h	a	a	c	a	a	h	h	h	h	h	h	a	c	h	a	h	h	h	a	h	c
chr4	AC4B0270	Unigene27270	71	A	G	S	h	h	h	a	c	a	h	h	c	a	h	h	h	a	h	a	h	h	a	c	h	h	a	a	c	a	a	h	h	h	h	h	h	a	c	a	a	h	h	h	a	h	c
chr4	AC4B0280	CL449.Contig2	1113	G	A	S	h	h	h	a	c	a	h	h	c	a	h	h	h	a	h	a	h	h	a	c	h	h	a	a	c	a	a	h	h	h	h	h	h	a	c	a	a	h	c	h	a	h	c
chr4	AC4B0290	Unigene13584	176	C	T	S	h	h	h	a	c	a	h	h	c	a	h	h	h	a	h	a	h	h	a	c	h	h	a	a	c	a	a	h	h	h	h	h	h	a	c	a	a	h	c	h	a	h	c
chr4	AC4B0300	Unigene21401	1887	C	T	S	h	h	h	a	c	a	h	h	c	a	h	h	h	a	h	a	h	h	a	c	h	h	a	a	c	a	a	h	h	h	h	h	h	a	c	a	a	h	c	h	a	h	c
chr4	AC4B0310	CL1875.Contig1	1147	G	A	S	h	h	h	a	c	a	h	h	c	a	h	h	h	a	h	a	h	h	a	c	h	h	a	h	c	a	a	h	h	h	h	h	h	a	c	a	a	h	c	h	a	h	c
chr4	AC4B0310	CL2379.Contig2	250	A	G	S	h	h	h	a	c	a	h	h	c	a	h	h	h	a	h	a	h	h	a	c	h	h	a	h	c	a	a	h	h	h	h	h	h	a	c	a	a	h	c	h	a	h	c
chr4	AC4B0310	Unigene22182	128	G	T	S	h	h	h	a	c	a	h	h	c	a	h	h	h	a	h	a	h	h	a	c	h	h	a	h	c	a	a	h	h	h	h	h	h	a	c	a	a	h	c	h	a	h	c
chr4	AC4B0320	Unigene27543	713	G	A	S	h	h	h	a	c	a	h	h	c	a	h	h	h	a	h	a	h	h	a	c	h	h	a	h	c	a	a	h	h	h	h	h	h	a	c	a	a	h	h	h	a	h	c
chr4	AC4B0330	CL2580.Contig2	427	T	C	S	h	h	h	a	c	a	h	h	c	a	h	h	h	a	h	a	h	h	a	c	h	h	a	h	c	a	a	h	h	h	h	h	h	a	c	a	a	h	h	h	a	h	h
chr4	AC4B0330	Unigene11436	54	T	C	S	h	h	h	a	c	a	h	h	c	a	h	h	h	a	h	a	h	h	a	c	h	h	a	h	c	a	a	h	h	h	h	h	h	a	c	a	a	h	h	h	a	h	h
chr4	AC4B0340	CL1685.Contig1	556	C	T	S	h	h	h	a	c	a	h	h	c	a	h	h	h	a	h	a	h	h	a	c	h	h	a	h	c	a	a	h	h	h	h	h	h	a	c	a	a	h	h	h	a	h	h
chr4	AC4B0340	CL5079.Contig1	214	T	G	S	h	h	h	a	c	a	h	h	c	a	h	h	h	a	h	a	h	h	a	c	h	h	a	h	c	a	a	h	h	h	h	h	h	a	c	a	a	h	h	h	a	h	h
chr4	AC4B0340	Unigene12476	245	G	A	S	h	h	h	a	c	a	h	h	c	a	h	h	h	a	h	a	h	h	a	c	h	h	a	h	c	a	a	h	h	h	h	h	h	a	c	a	a	h	h	h	a	h	h
chr4	AC4B0350	CL5189.Contig1	1144	A	C	S	h	h	h	a	c	a	h	h	c	a	h	h	h	a	h	a	h	h	a	c	h	h	a	h	c	a	a	h	h	h	c	h	h	a	c	a	a	h	h	h	a	h	h
chr4	AC4B0360	CL4713.Contig1	665	A	C	S	h	h	h	a	c	a	h	a	c	a	h	h	h	h	h	a	h	h	a	c	h	h	a	h	c	a	a	h	h	h	c	h	a	a	c	a	a	h	h	h	a	h	h
chr4	AC4B0360	Unigene11327	498	G	A	S	h	h	h	a	c	a	h	a	c	a	h	h	h	h	h	a	h	h	a	c	h	h	a	h	c	a	a	h	h	h	c	h	a	a	c	a	a	h	h	h	a	h	h
chr4	AC4B0360	Unigene13730	533	A	G	S	h	h	h	a	c	a	h	a	c	a	h	h	h	h	h	a	h	h	a	c	h	h	a	h	c	a	a	h	h	h	c	h	a	a	c	a	a	h	h	h	a	h	h
chr4	AC4B0360	Unigene8651	20	T	A	S	h	h	h	a	c	a	h	a	c	a	h	h	h	h	h	a	h	h	a	c	h	h	a	h	c	a	a	h	h	h	c	h	a	a	c	a	a	h	h	h	a	h	h
chr4	AC4B0370	CL868.Contig1	388	T	C	S	h	h	h	a	c	a	h	a	c	a	h	h	h	h	h	a	h	h	a	c	h	h	a	h	c	a	a	h	h	h	h	h	a	a	c	a	a	h	h	h	a	h	h
chr4	AC4B0370	Unigene25898	1682	G	C	S	h	h	h	a	c	a	h	a	c	a	h	h	h	h	h	a	h	h	a	c	h	h	a	h	c	a	a	h	h	h	h	h	a	a	c	a	a	h	h	h	a	h	h
chr4	AC4B0370	Unigene27192	1504	C	A	S	h	h	h	a	c	a	h	a	c	a	h	h	h	h	h	a	h	h	a	c	h	h	a	h	c	a	a	h	h	h	h	h	a	a	c	a	a	h	h	h	a	h	h
chr4	AC4B0380	Unigene28480	576	A	G	S	h	h	h	h	c	a	h	a	c	a	h	h	h	h	h	a	h	h	a	c	h	h	a	h	c	a	a	h	h	h	h	h	a	a	c	a	a	h	h	h	a	h	h
chr4	AC4B0390	CL1027.Contig2	1080	G	A	S	h	h	h	h	c	a	h	a	c	h	h	h	h	h	h	a	a	h	a	c	h	h	a	h	c	a	a	h	h	h	h	h	a	a	c	a	a	h	h	h	a	h	h
chr4	AC4B0390	Unigene17463	360	C	G	S	h	h	h	h	c	a	h	a	c	h	h	h	h	h	h	a	a	h	a	c	h	h	a	h	c	a	a	h	h	h	h	h	a	a	c	a	a	h	h	h	a	h	h
chr4	AC4B0390	Unigene442	1233	A	G	S	h	h	h	h	c	a	h	a	c	h	h	h	h	h	h	a	a	h	a	c	h	h	a	h	c	a	a	h	h	h	h	h	a	a	c	a	a	h	h	h	a	h	h
chr4	AC4B0400	CL178.Contig1	102	G	A	S	h	h	h	h	c	a	h	a	c	h	h	h	h	h	h	a	a	h	a	c	h	h	a	h	c	a	a	h	h	c	h	h	a	a	c	a	a	h	h	h	a	h	h
chr4	AC4B0410	CL5382.Contig1	98	C	G	S	h	h	h	h	c	a	h	a	c	h	h	h	h	h	h	a	a	h	a	c	h	h	a	h	c	a	a	h	h	c	h	h	a	a	c	a	a	h	h	h	a	h	h
chr4	AC4B0410	CL5618.Contig1	478	T	C	S	h	h	h	h	c	a	h	a	c	h	h	h	h	h	h	a	a	h	a	c	h	h	a	h	c	a	a	h	h	c	h	h	a	a	c	a	a	h	h	h	a	h	h
chr4	AC4B0410	Unigene16172	623	A	G	S	h	h	h	h	c	a	h	a	c	h	h	h	h	h	h	a	a	h	a	c	h	h	a	h	c	a	a	h	h	c	h	h	a	a	c	a	a	h	h	h	a	h	h
chr4	AC4B0410	Unigene29316	577	C	T	S	h	h	h	h	c	a	h	a	c	h	h	h	h	h	h	a	a	h	a	c	h	h	a	h	c	a	a	h	h	c	h	h	a	a	c	a	a	h	h	h	a	h	h
chr4	AC4B0420	Unigene10468	535	A	G	S	h	h	h	h	c	a	h	a	c	h	h	h	h	h	h	a	a	h	a	c	h	h	a	h	c	a	a	h	h	c	h	h	a	a	c	a	a	h	h	h	a	h	h
chr4	AC4B0420	Unigene10469	71	T	A	S	h	h	h	h	c	a	h	a	c	h	h	h	h	h	h	a	a	h	a	c	h	h	a	h	c	a	a	h	h	c	h	h	a	a	c	a	a	h	h	h	a	h	h
chr4	AC4B0420	Unigene711	10	T	C	S	h	h	h	h	c	a	h	a	c	h	h	h	h	h	h	a	a	h	a	c	h	h	a	h	c	a	a	h	h	c	h	h	a	a	c	a	a	h	h	h	a	h	h
chr4	AC4B0430	Unigene13527	773	G	T	S	h	h	h	h	c	a	h	a	c	h	h	h	h	h	h	a	a	h	a	c	h	h	a	h	c	a	a	h	h	c	h	h	a	h	c	a	a	h	h	h	a	h	h
chr4	AC4B0430	Unigene28331	114	C	T	S	h	h	h	h	c	a	h	a	c	h	h	h	h	h	h	a	a	h	a	c	h	h	a	h	c	a	a	h	h	c	h	h	a	h	c	a	a	h	h	h	a	h	h
chr4	AC4B0440	CL3191.Contig4	561	C	T	S	h	c	h	h	c	a	h	a	c	h	h	h	h	h	h	a	a	h	a	c	h	h	a	h	c	a	a	h	h	c	h	h	a	h	c	a	a	h	h	h	a	h	h
chr4	AC4B0440	CL6796.Contig1	57	A	G	S	h	c	h	h	c	a	h	a	c	h	h	h	h	h	h	a	a	h	a	c	h	h	a	h	c	a	a	h	h	c	h	h	a	h	c	a	a	h	h	h	a	h	h
chr4	AC4B0440	Unigene13874	750	C	T	S	h	c	h	h	c	a	h	a	c	h	h	h	h	h	h	a	a	h	a	c	h	h	a	h	c	a	a	h	h	c	h	h	a	h	c	a	a	h	h	h	a	h	h
chr4	AC4B0440	Unigene26949	72	T	A	S	h	c	h	h	c	a	h	a	c	h	h	h	h	h	h	a	a	h	a	c	h	h	a	h	c	a	a	h	h	c	h	h	a	h	c	a	a	h	h	h	a	h	h
chr4	AC4B0440	Unigene27555	226	G	A	S	h	c	h	h	c	a	h	a	c	h	h	h	h	h	h	a	a	h	a	c	h	h	a	h	c	a	a	h	h	c	h	h	a	h	c	a	a	h	h	h	a	h	h
chr4	AC4B0440	Unigene853	597	T	C	S	h	c	h	h	c	a	h	a	c	h	h	h	h	h	h	a	a	h	a	c	h	h	a	h	c	a	a	h	h	c	h	h	a	h	c	a	a	h	h	h	a	h	h
chr4	AC4B0440	Unigene8740	249	C	T	S	h	c	h	h	c	a	h	a	c	h	h	h	h	h	h	a	a	h	a	c	h	h	a	h	c	a	a	h	h	c	h	h	a	h	c	a	a	h	h	h	a	h	h
chr4	AC4B0440	Unigene8818	327	T	C	S	h	c	h	h	c	a	h	a	c	h	h	h	h	h	h	a	a	h	a	c	h	h	a	h	c	a	a	h	h	c	h	h	a	h	c	a	a	h	h	h	a	h	h
chr4	AC4B0440	Unigene9536	537	A	G	S	h	c	h	h	c	a	h	a	c	h	h	h	h	h	h	a	a	h	a	c	h	h	a	h	c	a	a	h	h	c	h	h	a	h	c	a	a	h	h	h	a	h	h
chr4	AC4B0450	Unigene25353	280	G	C	S	h	c	h	h	c	a	h	a	c	a	h	h	h	h	c	a	a	a	a	c	h	h	a	h	c	a	a	h	h	c	h	h	a	h	c	a	a	h	h	h	a	h	h
chr4	AC4B0450	CL5379.Contig2	590	C	T	S	h	c	h	h	c	a	h	a	c	a	h	h	h	h	c	a	a	a	a	c	h	h	a	h	h	a	a	h	h	c	h	h	a	h	c	a	a	h	h	h	a	h	h
chr4	AC4B0450	Unigene14034	1587	A	G	S	h	c	h	h	c	a	h	a	c	a	h	h	h	h	c	a	a	a	a	h	h	h	a	h	h	a	a	h	h	c	h	h	a	h	c	a	a	h	h	h	a	h	h
chr4	AC4B0450	Unigene27169	1140	T	C	S	h	c	h	h	c	a	h	a	c	a	h	h	h	h	c	a	a	a	a	h	h	h	a	h	h	a	a	h	h	c	h	h	a	h	c	a	a	h	h	h	a	h	h
chr4	AC4B0460	Unigene8116	267	G	C	S	h	c	h	h	c	a	h	h	c	a	h	h	h	h	c	a	a	a	a	c	h	h	a	h	h	a	a	h	h	c	h	h	a	h	c	a	a	h	h	h	a	h	h
chr4	AC4B0460	Unigene9763	47	T	G	S	h	c	h	h	c	a	h	h	c	a	h	h	h	h	c	a	a	a	a	c	h	h	a	h	h	a	a	h	h	c	h	h	a	h	c	a	a	h	h	h	a	h	h
chr4	AC4B0470	Unigene18041	485	G	C	S	h	c	h	h	c	a	h	h	c	a	h	h	h	h	c	a	a	a	a	c	h	h	a	h	h	h	a	h	h	c	h	h	a	h	c	a	a	h	h	c	a	h	c
chr4	AC4B0470	Unigene18044	257	C	T	S	h	c	h	h	c	a	h	h	c	a	h	h	h	h	c	a	a	a	a	c	h	h	a	h	h	h	a	h	h	c	h	h	a	h	c	a	a	h	h	c	a	h	c
chr4	AC4B0470	Unigene27220	530	C	T	S	h	c	h	h	c	a	h	h	c	a	h	h	h	h	c	a	a	a	a	c	h	h	a	h	h	h	a	h	h	c	h	h	a	h	c	a	a	h	h	c	a	h	c
chr4	AC4B0480	Unigene13511	417	A	G	S	h	c	h	h	c	a	h	h	c	a	h	h	h	h	c	a	h	a	a	c	h	h	a	h	h	h	a	h	h	c	h	h	a	h	c	a	a	h	h	c	a	h	c
chr4	AC4B0490	CL1488.Contig1	497	T	C	S	h	c	h	a	c	a	h	h	c	a	h	h	h	h	c	a	h	a	a	c	h	h	a	h	h	h	h	h	h	c	h	h	a	h	c	a	a	h	h	c	a	h	c
chr4	AC4B0490	CL373.Contig3	1595	C	A	S	h	c	h	a	c	a	h	h	c	a	h	h	h	h	c	a	h	a	a	c	h	h	a	h	h	h	h	h	h	c	h	h	a	h	c	a	a	h	h	c	a	h	c
chr4	AC4B0500	Unigene28537	1318	T	C	S	h	c	h	a	c	a	h	h	c	a	h	h	h	h	c	a	h	a	a	c	h	h	a	h	h	h	h	a	h	h	h	h	a	h	c	h	a	h	h	c	a	h	c
chr4	AC4B0510	Unigene19927	53	T	G	S	h	c	h	a	c	a	h	h	c	a	h	h	h	h	c	a	h	a	a	h	h	h	a	c	h	h	h	a	h	h	c	h	a	h	c	h	a	h	h	c	a	h	c
chr4	AC4B0520	Unigene8630	63	A	C	S	h	c	h	a	c	a	h	h	c	a	h	h	h	h	c	a	h	a	a	h	h	h	a	c	h	c	h	a	h	h	c	h	a	h	c	h	a	h	h	c	a	h	c
chr4	AC4B0530	Unigene30617	38	A	G	S	h	c	h	a	c	a	h	a	c	a	h	h	h	h	c	a	h	a	a	h	h	h	a	c	h	c	h	a	h	h	c	h	a	h	c	h	a	h	a	c	a	h	c
chr4	AC4B0540	CL3565.Contig3	201	T	C	S	h	c	h	a	c	a	h	a	c	a	h	h	h	h	c	a	h	a	a	h	h	h	a	c	h	c	h	a	h	h	c	h	a	h	c	h	a	h	a	c	h	h	c
chr4	AC4B0540	CL5380.Contig1	1947	C	T	S	h	c	h	a	c	a	h	a	c	a	h	h	h	h	c	a	h	a	a	h	h	h	a	c	h	c	h	a	h	h	c	h	a	h	c	h	a	h	a	c	h	h	c
chr4	AC4B0540	Unigene7818	195	C	T	S	h	c	h	a	c	a	h	a	c	a	h	h	h	h	c	a	h	a	a	h	h	h	a	c	h	c	h	a	h	h	c	h	a	h	c	h	a	h	a	c	h	h	c
chr4	AC4B0540	Unigene8567	795	G	A	S	h	c	h	a	c	a	h	a	c	a	h	h	h	h	c	a	h	a	a	h	h	h	a	c	h	c	h	a	h	h	c	h	a	h	c	h	a	h	a	c	h	h	c
chr4	AC4B0550	CL4858.Contig2	106	A	G	S	h	c	h	a	c	a	h	a	c	a	h	h	h	h	c	a	h	a	a	h	h	h	a	c	h	c	h	a	h	h	c	h	a	h	c	h	a	h	a	c	h	h	c
chr4	AC4B0560	Unigene27664	756	C	T	S	h	c	h	a	c	a	h	a	c	a	h	h	h	h	c	a	h	a	a	h	h	h	a	c	h	c	h	a	h	h	c	h	a	h	c	h	a	h	a	c	h	h	c
chr4	AC4B0570	Unigene14037	157	A	G	S	h	c	h	a	c	a	h	a	c	a	h	h	h	h	c	a	h	a	a	h	h	h	a	c	h	c	h	a	h	h	c	h	h	h	c	h	a	h	a	c	h	h	c
chr4	AC4B0570	Unigene685	367	C	A	S	h	c	h	a	c	a	h	a	c	a	h	h	h	h	c	a	h	a	a	h	h	h	a	c	h	c	h	a	h	h	c	h	h	h	c	h	a	h	a	c	h	h	c
chr4	AC4B0580	CL7137.Contig1	585	G	C	S	h	c	h	a	c	a	h	a	c	a	h	h	h	h	c	a	h	a	a	h	h	h	a	c	h	c	h	a	h	h	c	h	h	h	c	h	a	h	a	c	c	h	c
chr4	AC4B0590	CL7125.Contig1	167	C	A	S	h	c	h	a	c	a	h	a	c	a	h	h	h	h	c	a	h	a	a	h	h	h	a	c	h	c	h	a	h	h	c	h	h	h	c	h	a	h	a	c	c	h	c
chr4	AC4B0600	Unigene17878	1859	A	C	S	h	c	h	a	c	a	h	a	c	a	h	h	h	h	c	a	h	a	a	h	h	h	a	c	h	c	h	a	h	h	c	h	h	h	c	h	a	h	a	c	c	h	c
chr4	AC4B0610	Unigene27725	14	T	C	S	h	c	h	a	c	a	h	a	c	a	h	h	h	h	c	a	h	a	a	h	h	h	a	c	h	c	h	a	c	h	c	h	h	h	c	h	a	h	a	c	c	h	c
chr4	AC4B0620	Unigene27238	992	C	T	S	h	c	h	a	c	a	h	a	c	a	h	h	h	a	c	a	h	a	a	h	h	h	a	c	h	c	h	a	h	h	c	h	h	h	c	h	a	h	a	c	c	h	c
chr4	AC4B0630	CL2198.Contig2	416	T	C	S	h	c	h	h	c	a	h	a	c	a	h	h	h	a	h	a	h	a	a	h	h	h	a	c	h	c	h	a	h	h	c	h	h	h	c	h	a	c	a	c	c	h	h
chr4	AC4B0630	Unigene25382	27	C	T	S	h	c	h	h	c	a	h	a	c	a	h	h	h	a	h	a	h	a	a	h	h	h	a	c	h	c	h	a	h	h	c	h	h	h	c	h	a	c	a	c	c	h	h
chr4	AC4B0630	Unigene27701	628	A	G	S	h	c	h	h	c	a	h	a	c	a	h	h	h	a	h	a	h	a	a	h	h	h	a	c	h	c	h	a	h	h	c	h	h	h	c	h	a	c	a	c	c	h	h
chr4	AC4B0630	Unigene28486	379	G	A	S	h	c	h	h	c	a	h	a	c	a	h	h	h	a	h	a	h	a	a	h	h	h	a	c	h	c	h	a	h	h	c	h	h	h	c	h	a	c	a	c	c	h	h
chr4	AC4B0640	Unigene11128	471	T	A	S	h	c	h	h	c	a	h	a	c	a	h	h	h	a	h	a	h	a	a	h	h	h	a	c	h	c	h	a	h	h	c	h	h	h	c	h	a	c	a	c	c	h	h
chr4	AC4B0640	Unigene21434	88	T	C	S	h	c	h	h	c	a	h	a	c	a	h	h	h	a	h	a	h	a	a	h	h	h	a	c	h	c	h	a	h	h	c	h	h	h	c	h	a	c	a	c	c	h	h
chr4	AC4B0640	Unigene27856	122	A	G	S	h	c	h	h	c	a	h	a	c	a	h	h	h	a	h	a	h	a	a	h	h	h	a	c	h	c	h	a	h	h	c	h	h	h	c	h	a	c	a	c	c	h	h
chr4	AC4B0650	Unigene22445	50	T	A	S	h	c	h	h	c	a	h	a	c	a	h	h	h	a	h	a	h	a	a	h	h	h	a	c	h	c	h	a	h	h	c	h	h	h	c	h	a	c	a	c	c	h	h
chr4	AC4B0650	Unigene3491	444	T	C	S	h	c	h	h	c	a	h	a	c	a	h	h	h	a	h	a	h	a	a	h	h	h	a	c	h	c	h	a	h	h	c	h	h	h	c	h	a	c	a	c	c	h	h
chr4	AC4B0660	Unigene12661	320	A	G	S	h	c	h	h	c	a	h	a	c	a	h	h	h	a	h	a	h	a	a	h	h	h	a	c	h	c	c	a	h	h	c	h	h	h	c	h	a	c	a	c	c	h	h
chr4	AC4B0660	Unigene23076	673	G	A	S	h	c	h	h	c	a	h	a	c	a	h	h	h	a	h	a	h	a	a	h	h	h	a	c	h	c	c	a	h	h	c	h	h	h	c	h	a	c	a	c	c	h	h
chr4	AC4B0660	Unigene3371	113	T	A	S	h	c	h	h	c	a	h	a	c	a	h	h	h	a	h	a	h	a	a	h	h	h	a	c	h	c	c	a	h	h	c	h	h	h	c	h	a	c	a	c	c	h	h
chr4	AC4B0670	Unigene28327	184	A	G	S	h	c	h	h	c	a	h	a	c	a	h	h	h	a	h	a	h	h	a	h	h	h	a	c	h	c	c	a	h	h	c	h	h	h	c	h	a	c	a	c	c	h	h
chr4	AC4B0680	CL3848.Contig1	228	G	A	S	h	c	h	h	c	a	h	a	c	a	h	h	h	a	h	a	h	h	a	h	h	h	h	c	h	c	c	a	h	h	c	a	h	h	c	h	a	c	a	c	c	h	h
chr4	AC4B0690	Unigene12041	1431	C	T	S	h	c	h	h	c	a	h	a	c	a	a	h	h	a	h	a	h	h	a	h	h	h	h	c	h	c	c	a	h	h	c	a	h	h	c	h	a	c	a	c	c	h	h
chr4	AC4B0690	Unigene29392	379	G	A	S	h	c	h	h	c	a	h	a	c	a	a	h	h	a	h	a	h	h	a	h	h	h	h	c	h	c	c	a	h	h	c	a	h	h	c	h	a	c	a	c	c	h	h
chr4	AC4B0700	CL1140.Contig1	152	T	G	S	h	c	h	h	c	a	h	a	c	a	a	h	h	a	h	a	h	h	a	h	h	h	h	h	h	c	c	a	h	h	c	a	h	h	c	h	h	c	a	c	c	h	h
chr4	AC4B0700	Unigene27563	882	C	T	S	h	c	h	h	c	a	h	a	c	a	a	h	h	a	h	a	h	h	a	h	h	h	h	h	h	c	c	a	h	h	c	a	h	h	c	h	h	c	a	c	c	h	h
chr4	AC4B0700	Unigene8330	330	A	G	S	h	c	h	h	c	a	h	a	c	a	a	h	h	a	h	a	h	h	a	h	h	h	h	h	h	c	c	a	h	h	c	a	h	h	c	h	h	c	a	c	c	h	h
chr4	AC4B0710	Unigene9467	421	G	A	S	h	c	h	h	c	a	h	a	c	a	a	c	h	a	h	a	h	h	a	h	h	h	h	h	h	c	c	a	h	h	c	a	h	h	c	h	h	c	a	c	c	h	h
chr4	AC4B0720	CL3926.Contig1	642	T	C	S	a	c	h	h	c	a	h	a	c	a	a	c	h	a	h	a	h	h	a	h	h	h	h	h	h	c	c	a	h	h	c	a	h	c	c	h	h	c	a	c	c	h	h
chr4	AC4B0720	Unigene1021	966	C	G	S	a	c	h	h	c	a	h	a	c	a	a	c	h	a	h	a	h	h	a	h	h	h	h	h	h	c	c	a	h	h	c	a	h	c	c	h	h	c	a	c	c	h	h
chr4	AC4B0730	Unigene7482	376	C	T	S	a	c	h	h	c	a	h	a	c	a	a	c	h	a	h	a	h	h	a	h	h	h	h	h	h	c	c	a	h	h	c	a	h	c	c	h	h	c	a	c	c	h	h
chr4	AC4B0740	Unigene8019	90	T	C	S	a	c	h	h	c	a	h	a	c	a	h	c	h	a	h	a	h	h	a	h	h	h	h	h	h	c	c	a	h	h	c	a	h	c	c	h	h	c	a	c	c	h	h
chr4	AC4B0740	Unigene8020	39	C	A	S	a	c	h	h	c	a	h	a	c	a	h	c	h	a	h	a	h	h	a	h	h	h	h	h	h	c	c	a	h	h	c	a	h	c	c	h	h	c	a	c	c	h	h
chr4	AC4B0750	CL1697.Contig1	1351	C	G	S	a	c	h	h	c	a	h	a	c	a	h	c	h	a	h	a	h	h	a	h	h	h	h	h	h	c	c	a	h	h	c	a	h	c	c	h	h	c	a	c	c	h	h
chr4	AC4B0750	Unigene22599	603	G	A	S	a	c	h	h	c	a	h	a	c	a	h	c	h	a	h	a	h	h	a	h	h	h	h	h	h	c	c	a	h	h	c	a	h	c	c	h	h	c	a	c	c	h	h
chr4	AC4B0760	Unigene19716	477	T	C	S	a	c	h	h	c	a	h	a	c	a	h	c	h	a	h	a	h	h	a	h	h	h	h	h	h	c	c	a	h	h	c	a	h	c	c	h	h	c	a	c	c	h	h
chr4	AC4B0760	CL3592.Contig1	318	T	C	S	a	c	h	h	h	a	h	a	c	a	h	c	h	a	h	a	h	h	a	h	h	h	h	h	h	c	c	a	h	h	c	a	h	c	c	h	h	c	a	c	c	h	h
chr4	AC4B0760	CL4460.Contig1	100	T	C	S	a	c	h	h	h	a	h	a	c	a	h	c	h	a	h	a	h	h	a	h	h	h	h	h	h	c	c	a	h	h	c	a	h	c	c	h	h	c	a	c	c	h	h
chr4	AC4B0770	Unigene27960	360	T	C	S	a	c	h	h	h	a	h	a	c	a	h	c	h	a	h	a	h	h	a	h	h	h	h	h	h	c	c	a	h	h	c	a	h	c	c	h	h	c	a	c	c	h	h
chr4	AC4B0780	CL3087.Contig1	124	C	T	S	a	c	h	h	h	a	h	a	c	a	h	c	h	a	h	a	h	h	a	h	a	h	h	h	h	c	c	a	h	h	c	a	h	c	c	h	h	c	a	c	c	h	h
chr4	AC4B0780	CL4645.Contig2	214	T	G	S	a	c	h	h	h	a	h	a	c	a	h	c	h	a	h	a	h	h	a	h	a	h	h	h	h	c	c	a	h	h	c	a	h	c	c	h	h	c	a	c	c	h	h
chr4	AC4B0790	Unigene8592	790	G	A	S	a	c	h	h	h	a	h	a	c	a	h	c	h	h	h	a	h	h	a	h	a	h	h	h	h	c	c	a	h	h	c	a	h	c	c	h	h	c	a	c	c	h	h
chr4	AC4B0800	CL1604.Contig2	69	C	T	S	a	c	h	h	h	h	h	a	c	a	h	c	h	h	h	a	h	h	a	h	a	h	h	h	h	c	c	a	h	h	c	a	h	c	c	a	h	c	a	c	c	h	h
chr4	AC4B0800	CL4313.Contig2	1132	A	G	S	a	c	h	h	h	h	h	a	c	a	h	c	h	h	h	a	h	h	a	h	a	h	h	h	h	c	c	a	h	h	c	a	h	c	c	a	h	c	a	c	c	h	h
chr4	AC4B0800	CL6394.Contig2	87	T	C	S	a	c	h	h	h	h	h	a	c	a	h	c	h	h	h	a	h	h	a	h	a	h	h	h	h	c	c	a	h	h	c	a	h	c	c	a	h	c	a	c	c	h	h
chr4	AC4B0800	Unigene11763	107	T	C	S	a	c	h	h	h	h	h	a	c	a	h	c	h	h	h	a	h	h	a	h	a	h	h	h	h	c	c	a	h	h	c	a	h	c	c	a	h	c	a	c	c	h	h
chr4	AC4B0800	Unigene11764	40	C	G	S	a	c	h	h	h	h	h	a	c	a	h	c	h	h	h	a	h	h	a	h	a	h	h	h	h	c	c	a	h	h	c	a	h	c	c	a	h	c	a	c	c	h	h
chr4	AC4B0800	Unigene12496	847	T	C	S	a	c	h	h	h	h	h	a	c	a	h	c	h	h	h	a	h	h	a	h	a	h	h	h	h	c	c	a	h	h	c	a	h	c	c	a	h	c	a	c	c	h	h
chr4	AC4B0800	Unigene18451	234	T	C	S	a	c	h	h	h	h	h	a	c	a	h	c	h	h	h	a	h	h	a	h	a	h	h	h	h	c	c	a	h	h	c	a	h	c	c	a	h	c	a	c	c	h	h
chr4	AC4B0800	Unigene23291	342	T	G	S	a	c	h	h	h	h	h	a	c	a	h	c	h	h	h	a	h	h	a	h	a	h	h	h	h	c	c	a	h	h	c	a	h	c	c	a	h	c	a	c	c	h	h
chr4	AC4B0800	Unigene23386	142	A	G	S	a	c	h	h	h	h	h	a	c	a	h	c	h	h	h	a	h	h	a	h	a	h	h	h	h	c	c	a	h	h	c	a	h	c	c	a	h	c	a	c	c	h	h
chr4	AC4B0800	Unigene23876	798	T	C	S	a	c	h	h	h	h	h	a	c	a	h	c	h	h	h	a	h	h	a	h	a	h	h	h	h	c	c	a	h	h	c	a	h	c	c	a	h	c	a	c	c	h	h
chr4	AC4B0800	Unigene27305	172	C	T	S	a	c	h	h	h	h	h	a	c	a	h	c	h	h	h	a	h	h	a	h	a	h	h	h	h	c	c	a	h	h	c	a	h	c	c	a	h	c	a	c	c	h	h
chr4	AC4B0800	Unigene27351	34	T	C	S	a	c	h	h	h	h	h	a	c	a	h	c	h	h	h	a	h	h	a	h	a	h	h	h	h	c	c	a	h	h	c	a	h	c	c	a	h	c	a	c	c	h	h
chr4	AC4B0800	Unigene7837	984	C	T	S	a	c	h	h	h	h	h	a	c	a	h	c	h	h	h	a	h	h	a	h	a	h	h	h	h	c	c	a	h	h	c	a	h	c	c	a	h	c	a	c	c	h	h
chr4	AC4B0810	Unigene15963	91	A	G	S	a	c	h	h	h	h	h	a	c	a	h	c	h	h	h	a	h	h	a	h	a	h	h	h	h	c	c	h	h	h	c	a	h	c	c	a	h	c	a	c	c	h	h
chr4	AC4B0820	Unigene28371	167	C	G	S	a	c	h	h	h	h	h	a	c	a	h	c	h	h	h	a	h	h	a	h	a	h	h	h	h	c	c	h	h	h	c	a	h	c	c	a	h	c	h	c	c	h	h
chr5	AC5B0010	CL6089.Contig1	135	G	A	S	h	h	h	a	c	h	h	h	h	a	a	h	a	a	c	c	h	h	h	h	a	c	h	a	c	h	a	h	h	h	h	h	c	c	a	a	h	c	c	c	c	a	a
chr5	AC5B0010	Unigene10424	127	C	T	S	h	h	h	a	c	h	h	h	h	a	a	h	a	a	c	c	h	h	h	h	a	c	h	a	c	h	a	h	h	h	h	h	c	c	a	a	h	c	c	c	c	a	a
chr5	AC5B0020	CL529.Contig3	1509	C	T	S	h	h	h	a	c	h	h	h	h	a	a	h	a	a	c	h	h	h	h	h	a	c	h	a	c	h	h	h	h	h	h	h	c	c	a	a	h	c	c	c	c	a	a
chr5	AC5B0020	Unigene23321	161	C	A	S	h	h	h	a	c	h	h	h	h	a	a	h	a	a	c	h	h	h	h	h	a	c	h	a	c	h	h	h	h	h	h	h	c	c	a	a	h	c	c	c	c	a	a
chr5	AC5B0020	Unigene24175	400	A	G	S	h	h	h	a	c	h	h	h	h	a	a	h	a	a	c	h	h	h	h	h	a	c	h	a	c	h	h	h	h	h	h	h	c	c	a	a	h	c	c	c	c	a	a
chr5	AC5B0020	Unigene27759	480	C	T	S	h	h	h	a	c	h	h	h	h	a	a	h	a	a	c	h	h	h	h	h	a	c	h	a	c	h	h	h	h	h	h	h	c	c	a	a	h	c	c	c	c	a	a
chr5	AC5B0020	Unigene32255	22	C	T	S	h	h	h	a	c	h	h	h	h	a	a	h	a	a	c	h	h	h	h	h	a	c	h	a	c	h	h	h	h	h	h	h	c	c	a	a	h	c	c	c	c	a	a
chr5	AC5B0030	CL5835.Contig1	296	T	C	S	h	h	h	a	c	h	h	h	h	a	a	h	a	a	c	h	h	h	h	h	a	c	h	a	c	h	h	h	h	h	h	h	c	c	a	a	h	c	c	c	c	a	a
chr5	AC5B0040	CL2588.Contig2	330	C	T	S	h	h	h	a	c	h	h	h	h	a	a	h	a	a	h	h	h	h	h	h	a	c	h	a	c	h	h	h	h	h	h	h	c	c	a	a	h	c	c	c	c	a	a
chr5	AC5B0040	CL2739.Contig1	134	G	A	S	h	h	h	a	c	h	h	h	h	a	a	h	a	a	h	h	h	h	h	h	a	c	h	a	c	h	h	h	h	h	h	h	c	c	a	a	h	c	c	c	c	a	a
chr5	AC5B0040	Unigene26096	72	T	A	S	h	h	h	a	c	h	h	h	h	a	a	h	a	a	h	h	h	h	h	h	a	c	h	a	c	h	h	h	h	h	h	h	c	c	a	a	h	c	c	c	c	a	a
chr5	AC5B0040	Unigene27702	334	C	T	S	h	h	h	a	c	h	h	h	h	a	a	h	a	a	h	h	h	h	h	h	a	c	h	a	c	h	h	h	h	h	h	h	c	c	a	a	h	c	c	c	c	a	a
chr5	AC5B0040	Unigene9417	383	A	C	S	h	h	h	a	c	h	h	h	h	a	a	h	a	a	h	h	h	h	h	h	a	c	h	a	c	h	h	h	h	h	h	h	c	c	a	a	h	c	c	c	c	a	a
chr5	AC5B0050	Unigene10200	499	T	C	S	h	h	h	a	c	h	c	h	a	a	a	h	a	a	h	h	h	h	h	h	a	h	h	a	c	h	h	h	h	h	h	h	c	c	a	a	h	c	c	c	c	a	a
chr5	AC5B0060	CL656.Contig2	886	A	G	S	h	c	h	a	h	h	c	h	a	a	a	h	a	a	h	h	h	h	h	h	a	h	h	a	c	h	h	h	h	h	h	h	c	c	a	a	h	h	c	c	c	a	a
chr5	AC5B0060	Unigene13252	677	A	T	S	h	c	h	a	h	h	c	h	a	a	a	h	a	a	h	h	h	h	h	h	a	h	h	a	c	h	h	h	h	h	h	h	c	c	a	a	h	h	c	c	c	a	a
chr5	AC5B0070	Unigene11754	1818	T	C	S	h	c	h	a	h	h	h	h	a	a	a	h	a	a	h	h	h	h	h	h	a	h	h	a	c	h	h	h	h	h	h	h	c	c	a	a	h	h	c	c	c	a	a
chr5	AC5B0080	Unigene4417	361	A	C	S	h	c	h	a	h	h	h	h	a	a	a	h	a	a	h	h	h	h	h	h	a	h	h	a	c	h	h	h	h	h	h	h	c	c	a	a	h	h	c	c	c	a	a
chr5	AC5B0080	Unigene8074	56	A	C	S	h	c	h	a	h	h	h	h	a	a	a	h	a	a	h	h	h	h	h	h	a	h	h	a	c	h	h	h	h	h	h	h	c	c	a	a	h	h	c	c	c	a	a
chr5	AC5B0090	Unigene22506	108	C	T	S	a	c	h	a	h	h	h	h	a	h	a	h	a	a	h	h	h	h	h	h	a	h	a	a	c	h	h	h	h	h	h	h	c	c	a	a	h	h	c	c	c	a	a
chr5	AC5B0100	Unigene8189	399	T	G	S	a	c	h	a	h	h	h	h	a	h	a	h	a	a	h	h	h	c	h	h	a	h	a	a	c	h	h	h	h	h	h	h	c	c	a	a	h	h	c	c	c	a	a
chr5	AC5B0100	Unigene9807	182	T	C	S	a	c	h	a	h	h	h	h	a	h	a	h	a	a	h	h	h	c	h	h	a	h	a	a	c	h	h	h	h	h	h	h	c	c	a	a	h	h	c	c	c	a	a
chr5	AC5B0110	Unigene22598	154	A	C	S	a	c	h	a	h	h	h	h	a	h	a	h	a	a	h	h	h	c	h	h	a	h	a	a	c	h	h	h	h	h	h	h	c	c	a	a	h	h	c	c	c	a	a
chr5	AC5B0110	Unigene28582	268	T	A	S	a	c	h	a	h	h	h	h	a	h	a	h	a	a	h	h	h	c	h	h	a	h	a	a	c	h	h	h	h	h	h	h	c	c	a	a	h	h	c	c	c	a	a
chr5	AC5B0120	Unigene13777	1072	T	C	S	a	c	h	a	h	h	h	h	a	h	a	h	a	a	h	h	h	c	h	h	a	h	a	a	c	h	h	h	h	h	h	h	c	c	a	a	h	h	c	h	c	a	a
chr5	AC5B0120	Unigene19348	144	T	A	S	a	c	h	a	h	h	h	h	a	h	a	h	a	a	h	h	h	c	h	h	a	h	a	a	c	h	h	h	h	h	h	h	c	c	a	a	h	h	c	h	c	a	a
chr5	AC5B0120	Unigene20012	68	C	T	S	a	c	h	a	h	h	h	h	a	h	a	h	a	a	h	h	h	c	h	h	a	h	a	a	c	h	h	h	h	h	h	h	c	c	a	a	h	h	c	h	c	a	a
chr5	AC5B0130	Unigene12449	144	T	G	S	a	c	h	a	h	h	h	h	a	h	a	h	a	a	h	a	h	c	h	h	a	h	a	a	c	h	h	h	h	h	h	h	c	c	a	a	h	h	c	h	c	a	a
chr5	AC5B0130	Unigene24814	235	T	C	S	a	c	h	a	h	h	h	h	a	h	a	h	a	a	h	a	h	c	h	h	a	h	a	a	c	h	h	h	h	h	h	h	c	c	a	a	h	h	c	h	c	a	a
chr5	AC5B0130	Unigene27838	223	G	T	S	a	c	h	a	h	h	h	h	a	h	a	h	a	a	h	a	h	c	h	h	a	h	a	a	c	h	h	h	h	h	h	h	c	c	a	a	h	h	c	h	c	a	a
chr5	AC5B0140	Unigene14115	81	C	G	S	a	c	h	a	h	h	h	h	a	h	a	h	a	a	h	a	h	c	h	h	a	h	a	a	c	c	h	h	h	h	h	h	c	c	a	a	h	h	c	h	c	a	a
chr5	AC5B0140	Unigene14116	889	C	T	S	a	c	h	a	h	h	h	h	a	h	a	h	a	a	h	a	h	c	h	h	a	h	a	a	c	c	h	h	h	h	h	h	c	c	a	a	h	h	c	h	c	a	a
chr5	AC5B0150	CL3688.Contig1	264	T	C	S	a	c	h	a	h	h	h	h	a	h	a	h	a	a	h	a	c	c	h	h	a	h	a	a	c	c	h	h	h	h	h	h	c	c	a	a	h	h	c	h	c	a	a
chr5	AC5B0160	CL1679.Contig2	207	G	C	S	a	c	h	a	h	h	h	h	a	h	a	h	a	a	h	a	c	c	h	h	a	h	a	a	c	c	h	h	a	h	h	h	c	c	a	a	h	h	c	h	c	a	a
chr5	AC5B0160	CL3499.Contig1	445	A	G	S	a	c	h	a	h	h	h	h	a	h	a	h	a	a	h	a	c	c	h	h	a	h	a	a	c	c	h	h	a	h	h	h	c	c	a	a	h	h	c	h	c	a	a
chr5	AC5B0160	CL601.Contig2	196	T	C	S	a	c	h	a	h	h	h	h	a	h	a	h	a	a	h	a	c	c	h	h	a	h	a	a	c	c	h	h	a	h	h	h	c	c	a	a	h	h	c	h	c	a	a
chr5	AC5B0160	Unigene24004	174	C	T	S	a	c	h	a	h	h	h	h	a	h	a	h	a	a	h	a	c	c	h	h	a	h	a	a	c	c	h	h	a	h	h	h	c	c	a	a	h	h	c	h	c	a	a
chr5	AC5B0160	Unigene28186	412	G	A	S	a	c	h	a	h	h	h	h	a	h	a	h	a	a	h	a	c	c	h	h	a	h	a	a	c	c	h	h	a	h	h	h	c	c	a	a	h	h	c	h	c	a	a
chr5	AC5B0160	Unigene28383	207	G	A	S	a	c	h	a	h	h	h	h	a	h	a	h	a	a	h	a	c	c	h	h	a	h	a	a	c	c	h	h	a	h	h	h	c	c	a	a	h	h	c	h	c	a	a
chr5	AC5B0160	Unigene649	1106	G	A	S	a	c	h	a	h	h	h	h	a	h	a	h	a	a	h	a	c	c	h	h	a	h	a	a	c	c	h	h	a	h	h	h	c	c	a	a	h	h	c	h	c	a	a
chr5	AC5B0160	Unigene9079	256	A	T	S	a	c	h	a	h	h	h	h	a	h	a	h	a	a	h	a	c	c	h	h	a	h	a	a	c	c	h	h	a	h	h	h	c	c	a	a	h	h	c	h	c	a	a
chr5	AC5B0170	Unigene9092	874	A	C	S	a	c	h	a	h	h	h	h	a	h	a	h	a	a	h	a	c	c	h	h	a	h	a	a	c	c	h	h	a	h	h	h	c	c	a	a	h	h	c	h	c	a	a
chr5	AC5B0180	CL2698.Contig1	33	C	T	S	a	c	h	a	h	h	h	h	a	h	a	h	a	a	h	a	c	c	h	h	a	h	a	a	c	c	h	h	a	h	h	h	c	c	a	a	h	h	c	h	c	a	a
chr5	AC5B0180	Unigene22829	384	A	C	S	a	c	h	a	h	h	h	h	a	h	a	h	a	a	h	a	c	c	h	h	a	h	a	a	c	c	h	h	a	h	h	h	c	c	a	a	h	h	c	h	c	a	a
chr5	AC5B0180	Unigene22830	21	G	A	S	a	c	h	a	h	h	h	h	a	h	a	h	a	a	h	a	c	c	h	h	a	h	a	a	c	c	h	h	a	h	h	h	c	c	a	a	h	h	c	h	c	a	a
chr5	AC5B0180	Unigene22832	181	A	G	S	a	c	h	a	h	h	h	h	a	h	a	h	a	a	h	a	c	c	h	h	a	h	a	a	c	c	h	h	a	h	h	h	c	c	a	a	h	h	c	h	c	a	a
chr5	AC5B0190	Unigene24375	1250	T	G	S	a	c	h	a	h	h	h	h	a	h	a	h	a	a	h	a	c	c	h	h	a	h	a	a	c	h	h	h	a	h	h	h	c	a	a	a	h	h	h	h	c	a	a
chr5	AC5B0200	Unigene12314	167	A	G	S	a	c	h	a	h	h	h	h	a	h	a	h	a	a	h	a	c	c	h	h	a	h	a	a	c	h	h	h	a	h	h	h	c	a	a	a	h	h	h	h	c	a	a
chr5	AC5B0200	Unigene27387	118	T	G	S	a	c	h	a	h	h	h	h	a	h	a	h	a	a	h	a	c	c	h	h	a	h	a	a	c	h	h	h	a	h	h	h	c	a	a	a	h	h	h	h	c	a	a
chr5	AC5B0200	CL4483.Contig1	217	C	A	S	a	c	h	a	h	h	h	h	a	h	a	h	a	a	h	a	c	c	h	h	a	h	a	a	c	h	h	h	a	h	h	h	c	a	a	a	h	h	h	h	c	a	a
chr5	AC5B0210	CL6994.Contig1	251	C	T	S	a	c	h	a	h	h	h	h	a	h	a	h	a	a	h	a	c	c	h	h	a	h	a	a	c	h	h	h	a	h	h	h	c	a	a	a	h	h	h	h	c	a	a
chr5	AC5B0220	Unigene12458	352	T	C	S	a	c	h	a	h	h	h	h	a	h	a	h	a	a	h	a	c	c	h	h	a	h	a	a	c	h	h	h	a	h	h	h	c	a	a	a	h	h	h	h	c	a	a
chr5	AC5B0220	Unigene8152	244	G	A	S	a	c	h	a	h	h	h	h	a	h	a	h	a	a	h	a	c	c	h	h	a	h	a	a	c	h	h	h	a	h	h	h	c	a	a	a	h	h	h	h	c	a	a
chr5	AC5B0230	Unigene11313	633	T	C	S	a	c	h	a	h	h	h	h	a	h	a	h	a	a	h	a	c	c	h	a	a	h	a	a	c	h	h	h	a	h	h	h	c	a	a	a	h	h	h	h	c	a	a
chr5	AC5B0230	Unigene8451	133	G	C	S	a	c	h	a	h	h	h	h	a	h	a	h	a	a	h	a	c	c	h	a	a	h	a	a	c	h	h	h	a	h	h	h	c	a	a	a	h	h	h	h	c	a	a
chr5	AC5B0240	CL3540.Contig2	168	C	A	S	a	c	h	a	h	h	h	h	a	h	a	h	a	a	h	a	c	c	h	a	a	h	a	a	c	h	h	h	a	h	h	h	c	a	a	a	h	h	h	h	c	a	a
chr5	AC5B0240	Unigene7778	878	T	C	S	a	c	h	a	h	h	h	h	a	h	a	h	a	a	h	a	c	c	h	a	a	h	a	a	c	h	h	h	a	h	h	h	c	a	a	a	h	h	h	h	c	a	a
chr5	AC5B0240	Unigene7895	1774	C	T	S	a	c	h	a	h	h	h	h	a	h	a	h	a	a	h	a	c	c	h	a	a	h	a	a	c	h	h	h	a	h	h	h	c	a	a	a	h	h	h	h	c	a	a
chr5	AC5B0240	Unigene9096	796	T	C	S	a	c	h	a	h	h	h	h	a	h	a	h	a	a	h	a	c	c	h	a	a	h	a	a	c	h	h	h	a	h	h	h	c	a	a	a	h	h	h	h	c	a	a
chr5	AC5B0250	CL3784.Contig1	575	T	C	S	a	c	h	a	h	h	h	h	a	h	a	h	a	a	h	a	c	c	h	a	a	h	a	a	c	h	h	h	a	h	h	h	c	a	a	a	h	h	h	h	h	a	a
chr5	AC5B0260	Unigene19468	311	G	A	S	a	c	h	a	h	h	h	h	a	h	a	h	a	a	h	a	c	c	h	a	a	h	a	a	c	h	h	h	a	h	h	h	c	a	h	a	h	h	h	h	h	a	a
chr5	AC5B0260	Unigene4448	611	C	T	S	a	c	h	a	h	h	h	h	a	h	a	h	a	a	h	a	c	c	h	a	a	h	a	a	c	h	h	h	a	h	h	h	c	a	h	a	h	h	h	h	h	a	a
chr5	AC5B0270	CL711.Contig2	690	G	A	S	a	c	h	a	h	h	h	h	a	h	a	h	a	a	h	a	c	c	h	a	a	h	a	a	c	h	h	h	h	h	h	h	c	a	h	a	h	h	h	h	h	a	a
chr5	AC5B0270	Unigene21042	84	T	A	S	a	c	h	a	h	h	h	h	a	h	a	h	a	a	h	a	c	c	h	a	a	h	a	a	c	h	h	h	h	h	h	h	c	a	h	a	h	h	h	h	h	a	a
chr5	AC5B0280	Unigene12585	1130	T	C	S	a	c	h	a	h	h	h	h	a	h	a	h	a	a	h	a	h	c	h	a	a	h	a	a	c	h	h	h	h	a	h	h	c	a	h	a	h	h	h	h	a	a	a
chr5	AC5B0280	CL739.Contig1	1508	C	T	S	a	c	h	a	h	h	h	h	a	h	a	h	a	a	h	a	h	c	h	a	a	h	a	a	c	h	h	h	h	a	h	h	c	a	h	a	h	h	h	h	a	a	a
chr5	AC5B0290	Unigene24320	140	A	C	S	a	c	h	a	h	h	h	h	a	h	a	h	a	a	h	a	h	c	h	a	a	h	a	a	c	h	h	h	h	h	h	h	c	a	h	a	h	h	h	h	a	a	a
chr5	AC5B0300	Unigene14114	1792	A	T	S	a	c	h	a	h	c	h	h	a	h	a	h	a	a	h	a	h	c	h	a	a	h	a	a	c	h	h	h	h	h	h	h	c	a	h	a	h	h	h	h	a	a	a
chr5	AC5B0300	Unigene11551	422	A	G	S	a	c	h	a	h	c	h	h	a	h	a	h	a	a	h	a	h	c	h	a	a	h	a	a	c	h	h	h	h	h	h	h	c	a	h	a	h	h	h	h	a	a	a
chr5	AC5B0300	Unigene27625	607	G	A	S	a	c	h	a	h	c	h	h	a	h	a	h	a	a	h	a	h	c	h	a	a	h	a	a	c	h	h	h	h	h	h	h	c	a	h	a	h	h	h	h	a	a	a
chr5	AC5B0300	Unigene28115	182	C	T	S	a	c	h	a	h	c	h	h	a	h	a	h	a	a	h	a	h	c	h	a	a	h	a	a	c	h	h	h	h	h	h	h	c	a	h	a	h	h	h	h	a	a	a
chr5	AC5B0300	Unigene28154	704	A	T	S	a	c	h	a	h	c	h	h	a	h	a	h	a	a	h	a	h	c	h	a	a	h	a	a	c	h	h	h	h	h	h	h	c	a	h	a	h	h	h	h	a	a	a
chr5	AC5B0310	CL4476.Contig1	177	T	A	S	a	c	h	a	h	c	h	h	a	h	a	h	a	a	h	a	h	c	h	a	a	h	a	a	c	h	h	h	h	h	h	h	c	a	h	a	h	h	h	h	a	a	a
chr5	AC5B0320	Unigene24057	278	T	C	S	a	c	h	a	h	h	h	h	a	h	a	h	a	a	h	a	h	c	h	a	a	h	a	a	c	h	h	h	h	h	h	h	c	a	h	a	h	h	h	h	a	a	a
chr5	AC5B0330	Unigene29162	1435	C	T	S	a	c	h	a	h	h	h	h	a	h	a	h	a	a	h	a	h	c	h	a	a	h	a	a	c	h	h	h	h	h	h	h	c	a	h	a	h	h	h	h	a	a	h
chr5	AC5B0340	Unigene5896	244	A	G	S	a	c	h	a	h	h	h	h	a	h	a	h	a	a	h	a	h	c	h	a	a	h	a	a	c	h	h	h	h	h	h	h	c	a	h	a	h	h	h	h	a	a	h
chr5	AC5B0340	Unigene13568	82	G	A	S	a	c	h	a	h	h	h	h	a	h	a	h	a	a	h	a	h	c	h	a	a	h	a	a	c	h	h	h	h	h	h	h	c	a	h	a	h	h	h	h	a	a	h
chr5	AC5B0350	Unigene14940	474	T	A	S	a	c	h	a	h	h	h	h	a	h	a	h	a	a	h	a	h	c	h	a	a	h	a	a	c	h	h	h	h	h	h	h	c	a	h	a	h	h	h	h	a	a	h
chr5	AC5B0350	CL1288.Contig1	528	T	C	S	a	c	h	a	h	h	h	h	a	h	a	h	a	a	a	a	h	c	h	a	a	h	a	a	c	h	h	h	h	h	h	h	c	a	h	a	h	h	h	h	a	a	h
chr5	AC5B0350	CL2592.Contig2	692	C	A	S	a	c	h	a	h	h	h	h	a	h	a	h	a	a	a	a	h	c	h	a	a	h	a	a	c	h	h	h	h	h	h	h	c	a	h	a	h	h	h	h	a	a	h
chr5	AC5B0350	CL4012.Contig1	1351	G	A	S	a	c	h	a	h	h	h	h	a	h	a	h	a	a	a	a	h	c	h	a	a	h	a	a	c	h	h	h	h	h	h	h	c	a	h	a	h	h	h	h	a	a	h
chr5	AC5B0350	Unigene11382	339	C	T	S	a	c	h	a	h	h	h	h	a	h	a	h	a	a	a	a	h	c	h	a	a	h	a	a	c	h	h	h	h	h	h	h	c	a	h	a	h	h	h	h	a	a	h
chr5	AC5B0350	Unigene21603	333	A	G	S	a	c	h	a	h	h	h	h	a	h	a	h	a	a	a	a	h	c	h	a	a	h	a	a	c	h	h	h	h	h	h	h	c	a	h	a	h	h	h	h	a	a	h
chr5	AC5B0350	Unigene23907	767	G	A	S	a	c	h	a	h	h	h	h	a	h	a	h	a	a	a	a	h	c	h	a	a	h	a	a	c	h	h	h	h	h	h	h	c	a	h	a	h	h	h	h	a	a	h
chr5	AC5B0360	Unigene27822	134	A	G	S	a	h	h	a	h	h	h	h	a	h	a	a	a	a	a	a	h	c	h	a	a	h	a	a	c	h	h	h	h	h	h	h	a	a	h	a	h	h	h	h	a	a	h
chr5	AC5B0360	Unigene7807	209	C	T	S	a	h	h	a	h	h	h	h	a	h	a	a	a	a	a	a	h	c	h	a	a	h	a	a	c	h	h	h	h	h	h	h	a	a	h	a	h	h	h	h	a	a	h
chr5	AC5B0370	Unigene12417	314	C	T	S	a	h	c	a	h	h	h	h	h	h	a	a	a	h	a	a	h	c	a	a	a	h	a	a	c	h	h	h	h	h	h	h	a	a	h	a	c	h	h	h	a	a	h
chr5	AC5B0370	Unigene187	161	G	A	S	a	h	c	a	h	h	h	h	h	h	a	a	a	h	a	a	h	c	a	a	a	h	a	a	c	h	h	h	h	h	h	h	a	a	h	a	c	h	h	h	a	a	h
chr5	AC5B0370	Unigene19905	137	A	C	S	a	h	c	a	h	h	h	h	h	h	a	a	a	h	a	a	h	c	a	a	a	h	a	a	c	h	h	h	h	h	h	h	a	a	h	a	c	h	h	h	a	a	h
chr5	AC5B0370	Unigene27188	622	T	G	S	a	h	c	a	h	h	h	h	h	h	a	a	a	h	a	a	h	c	a	a	a	h	a	a	c	h	h	h	h	h	h	h	a	a	h	a	c	h	h	h	a	a	h
chr5	AC5B0380	CL6044.Contig2	924	A	G	S	a	h	c	a	h	h	h	h	h	h	a	a	a	h	a	a	h	c	a	a	a	h	a	a	c	h	c	h	h	h	h	h	a	a	h	a	c	h	h	h	a	a	h
chr5	AC5B0380	Unigene6753	1651	C	G	S	a	h	c	a	h	h	h	h	h	h	a	a	a	h	a	a	h	c	a	a	a	h	a	a	c	h	c	h	h	h	h	h	a	a	h	a	c	h	h	h	a	a	h
chr5	AC5B0390	Unigene14888	435	T	C	S	a	h	c	a	h	h	h	h	h	h	a	a	a	h	a	a	h	c	a	a	a	h	a	a	c	h	c	h	h	h	h	h	a	a	h	a	c	h	h	h	a	a	h
chr5	AC5B0400	CL1407.Contig2	106	A	G	S	a	h	c	a	h	h	h	h	h	h	a	a	a	h	a	a	h	c	a	a	a	h	a	a	c	h	c	h	h	h	h	h	a	a	h	a	c	h	h	h	a	a	h
chr5	AC5B0400	Unigene10011	137	T	C	S	a	h	c	a	h	h	h	h	h	h	a	a	a	h	a	a	h	c	a	a	a	h	a	a	c	h	c	h	h	h	h	h	a	a	h	a	c	h	h	h	a	a	h
chr5	AC5B0400	Unigene10526	37	C	T	S	a	h	c	a	h	h	h	h	h	h	a	a	a	h	a	a	h	c	a	a	a	h	a	a	c	h	c	h	h	h	h	h	a	a	h	a	c	h	h	h	a	a	h
chr5	AC5B0400	Unigene10938	225	T	G	S	a	h	c	a	h	h	h	h	h	h	a	a	a	h	a	a	h	c	a	a	a	h	a	a	c	h	c	h	h	h	h	h	a	a	h	a	c	h	h	h	a	a	h
chr5	AC5B0400	Unigene12043	908	T	C	S	a	h	c	a	h	h	h	h	h	h	a	a	a	h	a	a	h	c	a	a	a	h	a	a	c	h	c	h	h	h	h	h	a	a	h	a	c	h	h	h	a	a	h
chr5	AC5B0400	Unigene13365	157	G	A	S	a	h	c	a	h	h	h	h	h	h	a	a	a	h	a	a	h	c	a	a	a	h	a	a	c	h	c	h	h	h	h	h	a	a	h	a	c	h	h	h	a	a	h
chr5	AC5B0400	Unigene20118	2043	C	T	S	a	h	c	a	h	h	h	h	h	h	a	a	a	h	a	a	h	c	a	a	a	h	a	a	c	h	c	h	h	h	h	h	a	a	h	a	c	h	h	h	a	a	h
chr5	AC5B0400	Unigene21162	762	G	A	S	a	h	c	a	h	h	h	h	h	h	a	a	a	h	a	a	h	c	a	a	a	h	a	a	c	h	c	h	h	h	h	h	a	a	h	a	c	h	h	h	a	a	h
chr5	AC5B0400	Unigene27314	103	G	C	S	a	h	c	a	h	h	h	h	h	h	a	a	a	h	a	a	h	c	a	a	a	h	a	a	c	h	c	h	h	h	h	h	a	a	h	a	c	h	h	h	a	a	h
chr5	AC5B0400	Unigene27665	139	C	G	S	a	h	c	a	h	h	h	h	h	h	a	a	a	h	a	a	h	c	a	a	a	h	a	a	c	h	c	h	h	h	h	h	a	a	h	a	c	h	h	h	a	a	h
chr5	AC5B0400	Unigene29862	256	G	A	S	a	h	c	a	h	h	h	h	h	h	a	a	a	h	a	a	h	c	a	a	a	h	a	a	c	h	c	h	h	h	h	h	a	a	h	a	c	h	h	h	a	a	h
chr5	AC5B0400	Unigene34066	145	G	A	S	a	h	c	a	h	h	h	h	h	h	a	a	a	h	a	a	h	c	a	a	a	h	a	a	c	h	c	h	h	h	h	h	a	a	h	a	c	h	h	h	a	a	h
chr5	AC5B0410	CL1371.Contig2	427	A	G	S	a	h	c	a	h	h	h	h	h	h	a	a	h	h	a	a	h	c	a	a	a	h	a	a	c	h	c	h	h	h	h	h	a	a	h	a	c	h	h	h	a	h	h
chr5	AC5B0410	Unigene13049	298	G	A	S	a	h	c	a	h	h	h	h	h	h	a	a	h	h	a	a	h	c	a	a	a	h	a	a	c	h	c	h	h	h	h	h	a	a	h	a	c	h	h	h	a	h	h
chr5	AC5B0420	Unigene14016	42	C	T	S	a	h	c	a	h	h	h	h	h	h	a	a	h	h	a	a	h	c	a	a	a	h	a	a	c	h	c	h	h	h	h	h	a	a	h	a	c	h	h	h	a	h	h
chr5	AC5B0430	Unigene24972	154	G	A	S	a	h	c	a	h	h	h	h	h	h	a	a	h	h	a	a	h	c	a	a	a	h	a	a	c	h	c	h	h	h	h	h	a	a	h	a	c	h	h	h	a	h	h
chr5	AC5B0440	CL1532.Contig1	564	C	T	S	a	h	c	a	h	h	h	h	h	h	a	a	h	h	a	a	h	c	a	a	a	h	a	a	c	h	c	h	h	h	h	c	a	a	h	a	c	h	h	h	a	h	h
chr5	AC5B0450	Unigene13461	211	A	G	S	h	h	c	h	h	h	h	h	h	h	a	a	h	h	a	a	h	c	a	a	a	h	a	a	c	h	c	h	h	h	h	c	a	a	h	a	c	h	h	h	a	h	h
chr5	AC5B0460	CL938.Contig2	238	A	G	S	h	h	c	h	h	h	h	h	h	h	a	a	h	h	a	a	h	c	a	a	h	h	a	a	c	h	c	h	h	h	h	c	a	a	h	a	c	h	h	h	a	h	h
chr5	AC5B0460	Unigene12954	716	G	A	S	h	h	c	h	h	h	h	h	h	h	a	a	h	h	a	a	h	c	a	a	h	h	a	a	c	h	c	h	h	h	h	c	a	a	h	a	c	h	h	h	a	h	h
chr5	AC5B0470	Unigene12227	460	G	A	S	h	h	c	h	h	h	h	h	h	h	a	a	h	h	a	a	h	c	a	a	h	h	a	a	c	h	c	h	h	h	h	c	a	a	h	a	c	h	h	h	a	h	h
chr5	AC5B0480	CL3484.Contig2	1427	C	T	S	h	h	c	h	h	h	h	h	h	h	a	a	h	h	a	a	h	c	a	a	h	h	a	a	c	h	c	h	h	h	h	c	a	a	h	a	c	h	h	h	a	h	h
chr5	AC5B0490	Unigene9767	256	C	T	S	h	h	c	h	h	h	h	h	h	h	a	a	h	h	a	a	h	c	a	a	h	h	a	a	c	h	c	h	h	a	h	c	a	a	h	a	c	h	h	h	a	h	h
chr5	AC5B0500	Unigene22754	348	C	T	S	h	h	c	h	h	h	h	h	h	h	a	a	h	h	a	a	h	c	a	a	h	h	a	a	c	h	h	h	h	a	h	c	h	a	c	a	c	h	h	h	a	h	a
chr5	AC5B0500	Unigene22755	87	T	C	S	h	h	c	h	h	h	h	h	h	h	a	a	h	h	a	a	h	c	a	a	h	h	a	a	c	h	h	h	h	a	h	c	h	a	c	a	c	h	h	h	a	h	a
chr5	AC5B0510	Unigene27950	1130	G	T	S	h	h	c	h	h	h	h	h	h	h	a	a	h	h	a	a	h	c	a	a	h	h	a	a	h	h	h	h	h	a	h	c	h	a	c	a	c	h	h	h	a	h	a
chr5	AC5B0510	Unigene7865	223	C	T	S	h	h	c	h	h	h	h	h	h	h	a	a	h	h	a	a	h	c	a	a	h	h	a	a	h	h	h	h	h	a	h	c	h	a	c	a	c	h	h	h	a	h	a
chr5	AC5B0520	CL5370.Contig1	613	G	A	S	h	h	c	h	h	h	h	h	h	h	a	a	h	h	a	a	h	c	a	a	h	h	a	a	h	h	h	h	h	a	h	c	h	a	c	a	c	h	c	h	a	h	a
chr5	AC5B0520	CL5546.Contig1	143	G	A	S	h	h	c	h	h	h	h	h	h	h	a	a	h	h	a	a	h	c	a	a	h	h	a	a	h	h	h	h	h	a	h	c	h	a	c	a	c	h	c	h	a	h	a
chr5	AC5B0520	Unigene11549	1559	C	T	S	h	h	c	h	h	h	h	h	h	h	a	a	h	h	a	a	h	c	a	a	h	h	a	a	h	h	h	h	h	a	h	c	h	a	c	a	c	h	c	h	a	h	a
chr5	AC5B0520	Unigene9469	160	G	A	S	h	h	c	h	h	h	h	h	h	h	a	a	h	h	a	a	h	c	a	a	h	h	a	a	h	h	h	h	h	a	h	c	h	a	c	a	c	h	c	h	a	h	a
chr5	AC5B0530	Unigene27286	739	C	T	S	h	h	c	h	h	h	h	h	h	h	a	a	h	h	a	a	h	c	a	a	h	h	a	a	h	h	h	h	h	a	h	c	h	a	c	a	c	h	c	h	a	h	a
chr5	AC5B0530	Unigene11981	1177	T	C	S	h	h	c	h	h	h	h	h	h	a	a	a	h	h	a	a	h	c	a	a	h	h	a	a	h	h	h	h	h	a	h	c	h	a	c	a	c	h	c	h	a	h	a
chr5	AC5B0540	Unigene8313	162	T	C	S	h	h	c	h	h	h	h	c	h	a	a	a	h	h	a	a	h	c	a	a	h	h	a	a	h	h	h	h	h	a	h	c	h	a	c	a	c	h	c	h	a	h	a
chr5	AC5B0550	CL1097.Contig1	1513	T	C	S	h	h	c	h	h	h	h	c	h	a	a	a	h	h	a	a	h	c	h	a	h	h	a	a	h	h	h	h	h	a	h	c	h	a	c	a	c	h	c	h	a	h	a
chr5	AC5B0560	CL1283.Contig3	40	G	A	S	h	h	c	h	h	h	h	c	h	a	a	a	h	h	a	a	h	c	h	a	h	h	a	a	h	h	h	h	h	a	h	c	h	a	c	a	c	h	c	h	a	h	a
chr5	AC5B0560	CL1722.Contig1	55	G	A	S	h	h	c	h	h	h	h	c	h	a	a	a	h	h	a	a	h	c	h	a	h	h	a	a	h	h	h	h	h	a	h	c	h	a	c	a	c	h	c	h	a	h	a
chr5	AC5B0560	CL2094.Contig1	163	G	A	S	h	h	c	h	h	h	h	c	h	a	a	a	h	h	a	a	h	c	h	a	h	h	a	a	h	h	h	h	h	a	h	c	h	a	c	a	c	h	c	h	a	h	a
chr5	AC5B0560	Unigene12398	985	T	C	S	h	h	c	h	h	h	h	c	h	a	a	a	h	h	a	a	h	c	h	a	h	h	a	a	h	h	h	h	h	a	h	c	h	a	c	a	c	h	c	h	a	h	a
chr5	AC5B0560	Unigene27797	79	C	T	S	h	h	c	h	h	h	h	c	h	a	a	a	h	h	a	a	h	c	h	a	h	h	a	a	h	h	h	h	h	a	h	c	h	a	c	a	c	h	c	h	a	h	a
chr5	AC5B0570	CL3057.Contig2	177	T	C	S	h	h	c	h	h	h	a	c	h	a	a	a	h	h	a	a	h	c	h	a	h	h	a	h	h	h	h	h	h	a	h	c	h	a	c	a	c	h	c	h	a	h	a
chr5	AC5B0570	Unigene11216	265	C	T	S	h	h	c	h	h	h	a	c	h	a	a	a	h	h	a	a	h	c	h	a	h	h	a	h	h	h	h	h	h	a	h	c	h	a	c	a	c	h	c	h	a	h	a
chr5	AC5B0570	Unigene11622	1368	A	G	S	h	h	c	h	h	h	a	c	h	a	a	a	h	h	a	a	h	c	h	a	h	h	a	h	h	h	h	h	h	a	h	c	h	a	c	a	c	h	c	h	a	h	a
chr5	AC5B0570	Unigene28495	186	A	G	S	h	h	c	h	h	h	a	c	h	a	a	a	h	h	a	a	h	c	h	a	h	h	a	h	h	h	h	h	h	a	h	c	h	a	c	a	c	h	c	h	a	h	a
chr5	AC5B0570	Unigene32858	210	A	G	S	h	h	c	h	h	h	a	c	h	a	a	a	h	h	a	a	h	c	h	a	h	h	a	h	h	h	h	h	h	a	h	c	h	a	c	a	c	h	c	h	a	h	a
chr5	AC5B0580	Unigene13124	206	A	C	S	h	h	c	h	h	h	a	c	h	a	a	a	h	h	a	a	h	c	h	a	h	h	a	h	h	h	h	h	h	a	h	c	h	a	c	a	c	h	c	h	a	h	a
chr5	AC5B0580	Unigene6470	283	C	T	S	h	h	c	h	h	h	a	c	h	a	a	a	h	h	a	a	h	c	h	a	h	h	a	h	h	h	h	h	h	a	h	c	h	a	c	a	c	h	c	h	a	h	a
chr5	AC5B0590	Unigene13458	681	T	C	S	h	h	c	h	a	h	a	c	a	a	a	a	h	h	a	a	h	c	h	a	h	h	a	h	h	h	h	h	h	a	h	c	h	a	c	a	c	h	c	h	a	h	a
chr5	AC5B0590	Unigene27202	75	A	C	S	h	h	c	h	a	h	a	c	a	a	a	a	h	h	a	a	h	c	h	a	h	h	a	h	h	h	h	h	h	a	h	c	h	a	c	a	c	h	c	h	a	h	a
chr5	AC5B0590	Unigene27748	1029	A	C	S	h	h	c	h	a	h	a	c	a	a	a	a	h	h	a	a	h	c	h	a	h	h	a	h	h	h	h	h	h	a	h	c	h	a	c	a	c	h	c	h	a	h	a
chr5	AC5B0590	Unigene9751	342	C	T	S	h	h	c	h	a	h	a	c	a	a	a	a	h	h	a	a	h	c	h	a	h	h	a	h	h	h	h	h	h	a	h	c	h	a	c	a	c	h	c	h	a	h	a
chr5	AC5B0590	Unigene9752	222	C	T	S	h	h	c	h	a	h	a	c	a	a	a	a	h	h	a	a	h	c	h	a	h	h	a	h	h	h	h	h	h	a	h	c	h	a	c	a	c	h	c	h	a	h	a
chr5	AC5B0600	Unigene27501	490	C	T	S	h	h	c	h	a	h	a	c	a	a	a	a	h	h	a	a	h	c	h	a	h	h	a	h	h	h	h	h	h	a	h	c	h	a	c	a	c	h	c	h	a	h	a
chr5	AC5B0600	Unigene28780	140	G	T	S	h	h	c	h	a	h	a	c	a	a	a	a	h	h	a	a	h	c	h	a	h	h	a	h	h	h	h	h	h	a	h	c	h	a	c	a	c	h	c	h	a	h	a
chr5	AC5B0600	Unigene7463	479	A	G	S	h	h	c	h	a	h	a	c	a	a	a	a	h	h	a	a	h	c	h	a	h	h	a	h	h	h	h	h	h	a	h	c	h	a	c	a	c	h	c	h	a	h	a
chr5	AC5B0610	CL1066.Contig1	363	A	G	S	h	h	c	h	a	h	a	c	a	a	a	a	h	h	a	a	h	c	h	a	h	h	a	h	h	h	h	h	h	a	h	c	h	a	c	a	c	h	c	h	a	h	a
chr5	AC5B0610	Unigene17017	291	C	T	S	h	h	c	h	a	h	a	c	a	a	a	a	h	h	a	a	h	c	h	a	h	h	a	h	h	h	h	h	h	a	h	c	h	a	c	a	c	h	c	h	a	h	a
chr5	AC5B0610	Unigene27723	685	A	G	S	h	h	c	h	a	h	a	c	a	a	a	a	h	h	a	a	h	c	h	a	h	h	a	h	h	h	h	h	h	a	h	c	h	a	c	a	c	h	c	h	a	h	a
chr5	AC5B0610	Unigene12182	637	G	A	S	h	h	c	h	a	h	a	c	a	a	a	a	h	h	a	a	h	c	h	a	h	h	a	h	h	h	h	h	h	a	h	c	h	a	c	a	c	h	c	h	a	h	a
chr5	AC5B0610	CL1094.Contig1	188	G	C	S	h	h	c	h	a	h	a	c	a	a	a	a	h	h	a	a	h	c	h	a	h	h	a	h	h	h	h	h	h	a	h	c	h	a	c	a	c	h	c	h	a	h	a
chr5	AC5B0610	Unigene36955	37	T	C	S	h	h	c	h	a	h	a	c	a	a	a	a	h	h	a	a	h	c	h	a	h	h	a	h	h	h	h	h	h	a	h	c	h	a	c	a	c	h	c	h	a	h	a
chr5	AC5B0620	CL3265.Contig3	1401	A	G	S	h	h	c	h	a	c	a	c	a	a	a	a	h	h	a	a	h	c	h	a	h	h	a	h	h	h	h	h	h	a	h	c	h	a	c	a	c	h	c	h	a	h	a
chr5	AC5B0620	CL3431.Contig3	499	A	G	S	h	h	c	h	a	c	a	c	a	a	a	a	h	h	a	a	h	c	h	a	h	h	a	h	h	h	h	h	h	a	h	c	h	a	c	a	c	h	c	h	a	h	a
chr5	AC5B0620	Unigene28357	681	G	T	S	h	h	c	h	a	c	a	c	a	a	a	a	h	h	a	a	h	c	h	a	h	h	a	h	h	h	h	h	h	a	h	c	h	a	c	a	c	h	c	h	a	h	a
chr5	AC5B0620	Unigene41022	89	A	G	S	h	h	c	h	a	c	a	c	a	a	a	a	h	h	a	a	h	c	h	a	h	h	a	h	h	h	h	h	h	a	h	c	h	a	c	a	c	h	c	h	a	h	a
chr5	AC5B0630	CL4589.Contig1	199	C	G	S	h	h	c	h	a	c	a	c	a	a	a	a	h	h	a	a	h	c	h	a	h	h	a	h	h	h	h	h	h	a	h	c	h	a	c	a	c	h	c	h	a	h	a
chr5	AC5B0630	Unigene19748	112	G	T	S	h	h	c	h	a	c	a	c	a	a	a	a	h	h	a	a	h	c	h	a	h	h	a	h	h	h	h	h	h	a	h	c	h	a	c	a	c	h	c	h	a	h	a
chr5	AC5B0630	Unigene270	370	T	G	S	h	h	c	h	a	c	a	c	a	a	a	a	h	h	a	a	h	c	h	a	h	h	a	h	h	h	h	h	h	a	h	c	h	a	c	a	c	h	c	h	a	h	a
chr5	AC5B0630	Unigene4593	243	T	C	S	h	h	c	h	a	c	a	c	a	a	a	a	h	h	a	a	h	c	h	a	h	h	a	h	h	h	h	h	h	a	h	c	h	a	c	a	c	h	c	h	a	h	a
chr5	AC5B0640	Unigene21138	497	G	A	S	h	h	c	h	a	c	a	c	a	a	a	a	h	h	a	a	h	c	h	a	h	h	a	h	h	h	h	h	h	a	h	c	h	a	c	a	c	h	c	h	a	h	a
chr5	AC5B0640	Unigene28356	1658	C	T	S	h	h	c	h	a	c	a	c	a	a	a	a	h	h	a	a	h	c	h	a	h	h	a	h	h	h	h	h	h	a	h	c	h	a	c	a	c	h	c	h	a	h	a
chr5	AC5B0650	CL3912.Contig3	1092	A	G	S	h	h	c	h	a	c	a	c	a	a	a	a	h	h	a	a	h	c	h	a	h	h	a	h	h	h	h	h	h	a	h	c	c	a	c	a	c	h	c	h	a	h	a
chr5	AC5B0660	CL5324.Contig1	580	T	G	S	h	a	c	h	a	c	a	c	a	a	a	a	h	h	a	a	a	c	h	a	h	c	a	h	h	h	h	h	h	a	h	c	c	a	c	a	c	h	h	h	a	h	a
chr5	AC5B0670	Unigene4534	553	C	T	S	h	a	c	h	a	c	a	c	a	a	a	a	h	h	a	a	a	c	h	a	h	c	a	h	h	h	h	h	h	a	h	c	c	a	c	a	c	h	h	h	a	h	a
chr5	AC5B0680	CL5430.Contig1	982	A	G	S	h	a	c	h	a	c	a	c	a	a	a	a	h	h	a	a	a	c	h	a	h	c	a	h	h	h	h	h	h	a	h	c	c	a	c	h	c	h	h	h	a	h	a
chr5	AC5B0680	Unigene27755	1283	T	G	S	h	a	c	h	a	c	a	c	a	a	a	a	h	h	a	a	a	c	h	a	h	c	a	h	h	h	h	h	h	a	h	c	c	a	c	h	c	h	h	h	a	h	a
chr5	AC5B0680	Unigene8157	266	T	G	S	h	a	c	h	a	c	a	c	a	a	a	a	h	h	a	a	a	c	h	a	h	c	a	h	h	h	h	h	h	a	h	c	c	a	c	h	c	h	h	h	a	h	a
chr5	AC5B0690	Unigene29619	262	G	C	S	h	a	c	c	a	c	a	c	a	a	a	a	h	h	a	a	a	c	h	a	h	c	a	h	h	h	h	h	h	a	h	c	c	a	c	h	c	h	h	h	a	h	a
chr5	AC5B0690	Unigene4782	198	G	A	S	h	a	c	c	a	c	a	c	a	a	a	a	h	h	a	a	a	c	h	a	h	c	a	h	h	h	h	h	h	a	h	c	c	a	c	h	c	h	h	h	a	h	a
chr5	AC5B0690	Unigene9334	161	C	T	S	h	a	c	c	a	c	a	c	a	a	a	a	h	h	a	a	a	c	h	a	h	c	a	h	h	h	h	h	h	a	h	c	c	a	c	h	c	h	h	h	a	h	a
chr5	AC5B0700	Unigene4451	116	G	A	S	h	a	c	c	a	c	a	c	a	a	a	a	h	h	a	a	a	c	h	a	h	c	a	h	h	h	h	h	h	a	h	c	c	a	c	h	c	h	h	h	a	h	a
chr5	AC5B0700	Unigene6604	24	G	A	S	h	a	c	c	a	c	a	c	a	a	a	a	h	h	a	a	a	c	h	a	h	c	a	h	h	h	h	h	h	a	h	c	c	a	c	h	c	h	h	h	a	h	a
chr5	AC5B0710	Unigene23490	241	G	C	S	h	a	c	c	a	c	a	c	a	a	a	a	h	h	a	a	a	c	h	a	h	h	a	h	h	h	h	h	h	a	h	c	c	a	c	h	c	h	h	h	a	h	a
chr5	AC5B0710	Unigene4238	668	G	C	S	h	a	c	c	a	c	a	c	a	a	a	a	h	h	a	a	a	c	h	a	h	h	a	h	h	h	h	h	h	a	h	c	c	a	c	h	c	h	h	h	a	h	a
chr5	AC5B0710	Unigene4373	82	G	C	S	h	a	c	c	a	c	a	c	a	a	a	a	h	h	a	a	a	c	h	a	h	h	a	h	h	h	h	h	h	a	h	c	c	a	c	h	c	h	h	h	a	h	a
chr5	AC5B0710	Unigene5384	360	T	G	S	h	a	c	c	a	c	a	c	a	a	a	a	h	h	a	a	a	c	h	a	h	h	a	h	h	h	h	h	h	a	h	c	c	a	c	h	c	h	h	h	a	h	a
chr5	AC5B0720	CL6586.Contig1	701	T	G	S	h	a	c	c	a	c	a	c	a	a	a	a	h	h	a	a	a	c	h	a	h	h	a	h	h	h	h	h	h	a	h	c	c	a	c	h	c	h	h	h	a	h	a
chr5	AC5B0720	Unigene28224	432	G	A	S	h	a	c	c	a	c	a	c	a	a	a	a	h	h	a	a	a	c	h	a	h	h	a	h	h	h	h	h	h	a	h	c	c	a	c	h	c	h	h	h	a	h	a
chr5	AC5B0730	Unigene5883	66	T	C	S	c	a	c	c	a	c	a	c	a	a	a	a	h	h	a	a	a	c	h	a	h	h	a	h	h	h	h	h	h	a	c	c	c	a	c	h	c	h	h	h	h	h	a
chr5	AC5B0730	Unigene28027	372	G	A	S	c	a	c	c	a	c	a	c	a	a	a	a	h	h	a	a	a	c	h	a	c	h	a	h	h	h	h	h	h	a	c	c	c	a	c	h	c	h	h	h	h	h	a
chr5	AC5B0740	CL1067.Contig2	445	G	A	S	c	a	c	c	a	c	a	c	a	a	a	a	h	h	a	a	a	c	h	a	c	h	h	h	h	h	h	h	h	a	c	c	c	a	c	h	c	h	h	h	h	h	a
chr5	AC5B0740	CL2.Contig1	117	C	A	S	c	a	c	c	a	c	a	c	a	a	a	a	h	h	a	a	a	c	h	a	c	h	h	h	h	h	h	h	h	a	c	c	c	a	c	h	c	h	h	h	h	h	a
chr5	AC5B0740	CL5364.Contig2	1013	T	C	S	c	a	c	c	a	c	a	c	a	a	a	a	h	h	a	a	a	c	h	a	c	h	h	h	h	h	h	h	h	a	c	c	c	a	c	h	c	h	h	h	h	h	a
chr5	AC5B0740	Unigene28023	596	T	C	S	c	a	c	c	a	c	a	c	a	a	a	a	h	h	a	a	a	c	h	a	c	h	h	h	h	h	h	h	h	a	c	c	c	a	c	h	c	h	h	h	h	h	a
chr5	AC5B0740	Unigene28752	78	C	A	S	c	a	c	c	a	c	a	c	a	a	a	a	h	h	a	a	a	c	h	a	c	h	h	h	h	h	h	h	h	a	c	c	c	a	c	h	c	h	h	h	h	h	a
chr5	AC5B0740	Unigene8927	526	T	G	S	c	a	c	c	a	c	a	c	a	a	a	a	h	h	a	a	a	c	h	a	c	h	h	h	h	h	h	h	h	a	c	c	c	a	c	h	c	h	h	h	h	h	a
chr5	AC5B0740	Unigene13194	52	T	C	S	c	a	c	c	a	c	a	c	a	a	a	a	h	h	a	a	a	c	h	a	c	h	h	h	h	h	h	h	h	a	c	c	c	a	c	h	c	h	h	h	h	h	a
chr5	AC5B0750	CL701.Contig1	758	A	C	S	c	a	c	c	a	h	a	c	a	a	a	a	h	h	a	a	a	c	h	a	c	h	h	h	h	h	h	h	h	a	c	c	c	a	c	h	c	h	h	h	h	h	a
chr5	AC5B0750	Unigene9151	321	G	A	S	c	a	c	c	a	h	a	c	a	a	a	a	h	h	a	a	a	c	h	a	c	h	h	h	h	h	h	h	h	a	c	c	c	a	c	h	c	h	h	h	h	h	a
chr5	AC5B0760	Unigene7950	120	G	A	S	c	a	c	c	a	h	a	c	a	a	a	a	h	h	a	a	a	c	h	a	c	h	h	h	h	h	h	h	h	a	c	c	c	a	c	h	h	h	h	h	h	h	a
chr5	AC5B0770	CL5543.Contig2	640	A	G	S	c	a	c	c	a	h	h	c	a	a	a	a	h	h	a	a	a	c	h	a	c	h	h	h	h	h	h	h	h	a	c	c	c	a	c	h	h	h	h	h	h	h	a
chr5	AC5B0780	CL1599.Contig4	1467	T	C	S	c	a	c	c	a	h	h	c	a	a	a	a	h	h	a	a	a	c	h	a	c	h	h	h	h	h	h	h	h	a	c	c	c	a	c	h	h	h	h	h	c	h	a
chr5	AC5B0780	Unigene28536	93	G	A	S	c	a	c	c	a	h	h	c	a	a	a	a	h	h	a	a	a	c	h	a	c	h	h	h	h	h	h	h	h	a	c	c	c	a	c	h	h	h	h	h	c	h	a
chr5	AC5B0790	CL994.Contig1	364	A	G	S	c	a	c	c	a	h	h	h	a	a	a	a	h	h	a	a	a	c	h	a	c	h	c	h	h	h	h	a	h	a	c	c	c	a	c	h	h	h	h	h	c	h	a
chr5	AC5B0800	Unigene21034	120	G	T	S	c	a	c	c	a	h	h	h	a	a	a	a	h	h	a	a	a	c	h	a	c	h	c	h	h	h	h	a	h	a	c	c	c	a	c	h	h	h	h	c	c	h	a
chr5	AC5B0810	Unigene28084	62	A	G	S	c	a	h	c	a	h	h	h	a	a	a	a	h	h	a	a	a	h	h	a	c	h	c	h	h	c	h	a	h	a	c	c	c	a	c	h	h	h	h	c	c	h	a
chr6	AC6B0010	Unigene30489	282	A	G	S	h	a	h	h	a	h	a	c	c	c	a	a	c	h	c	h	h	h	h	h	h	c	c	h	h	a	h	h	h	c	c	c	a	h	a	c	h	c	h	h	h	a	a
chr6	AC6B0020	Unigene22466	1061	C	T	S	h	a	h	h	a	h	a	c	c	c	a	a	c	h	c	h	h	h	h	h	h	c	c	h	h	a	h	h	h	c	c	c	a	h	a	c	h	c	h	h	h	a	a
chr6	AC6B0020	Unigene22636	1591	G	A	S	h	a	h	h	a	h	a	c	c	c	a	a	c	h	c	h	h	h	h	h	h	c	c	h	h	a	h	h	h	c	c	c	a	h	a	c	h	c	h	h	h	a	a
chr6	AC6B0020	Unigene27754	95	C	T	S	h	a	h	h	a	h	a	c	c	c	a	a	c	h	c	h	h	h	h	h	h	c	c	h	h	a	h	h	h	c	c	c	a	h	a	c	h	c	h	h	h	a	a
chr6	AC6B0030	CL6133.Contig1	399	T	C	S	h	a	h	h	a	h	a	c	c	c	a	a	c	h	c	h	h	h	c	h	h	c	c	h	h	a	h	h	h	c	c	c	a	h	a	h	h	c	h	h	h	a	a
chr6	AC6B0030	Unigene29351	397	G	A	S	h	a	h	h	a	h	a	c	c	c	a	a	c	h	c	h	h	h	c	h	h	c	c	h	h	a	h	h	h	c	c	c	a	h	a	h	h	c	h	h	h	a	a
chr6	AC6B0040	Unigene13538	178	T	A	S	h	a	h	h	a	h	a	c	c	c	a	a	c	c	c	h	h	h	c	h	h	c	c	h	h	a	h	h	h	c	c	c	a	h	a	h	h	c	h	h	h	a	a
chr6	AC6B0050	Unigene23573	552	A	G	S	h	a	h	h	a	h	a	c	c	c	a	a	c	c	c	h	h	h	c	h	h	c	c	h	h	a	h	c	c	c	c	c	a	h	a	h	h	c	h	h	h	a	a
chr6	AC6B0050	Unigene29027	127	C	T	S	h	a	h	h	a	h	a	c	c	c	a	a	c	c	c	h	h	h	c	h	h	c	c	h	h	a	h	c	c	c	c	c	a	h	a	h	h	c	h	h	h	a	a
chr6	AC6B0050	Unigene30356	1128	T	G	S	h	a	h	h	a	h	a	c	c	c	a	a	c	c	c	h	h	h	c	h	h	c	c	h	h	a	h	c	c	c	c	c	a	h	a	h	h	c	h	h	h	a	a
chr6	AC6B0060	Unigene13578	376	G	A	S	h	a	h	h	a	h	a	h	c	c	a	a	c	c	c	h	h	h	c	h	h	c	c	h	h	a	h	c	c	c	c	c	a	h	a	h	h	c	h	h	h	a	a
chr6	AC6B0060	Unigene13624	761	G	A	S	h	a	h	h	a	h	a	h	c	c	a	a	c	c	c	h	h	h	c	h	h	c	c	h	h	a	h	c	c	c	c	c	a	h	a	h	h	c	h	h	h	a	a
chr6	AC6B0070	Unigene13813	2607	G	A	S	h	a	h	h	a	h	a	h	c	c	a	a	c	c	c	a	h	h	c	h	h	c	c	h	h	a	h	c	c	c	c	c	a	h	a	h	h	c	h	h	h	a	a
chr6	AC6B0070	Unigene29239	556	A	G	S	h	a	h	h	a	h	a	h	c	c	a	a	c	c	c	a	h	h	c	h	h	c	c	h	h	a	h	c	c	c	c	c	a	h	a	h	h	c	h	h	h	a	a
chr6	AC6B0080	Unigene18186	174	T	C	S	h	a	h	h	a	h	a	h	c	c	a	a	c	c	c	a	h	h	c	h	h	c	c	h	h	a	h	c	c	c	c	c	a	h	a	a	h	c	h	h	h	a	a
chr6	AC6B0080	Unigene24631	421	A	G	S	h	a	h	h	a	h	a	h	c	c	a	a	c	c	c	a	h	h	c	h	h	c	c	h	h	a	h	c	c	c	c	c	a	h	a	a	h	c	h	h	h	a	a
chr6	AC6B0090	Unigene21707	179	A	G	S	h	a	h	h	a	h	a	h	c	c	a	a	c	c	c	a	h	h	c	h	h	c	c	h	h	a	h	c	c	c	c	c	a	h	a	a	h	c	h	h	h	a	a
chr6	AC6B0100	Unigene11956	49	C	T	S	h	a	h	h	a	h	a	h	c	c	a	a	c	c	c	a	h	h	c	h	h	c	c	h	h	a	h	c	c	c	c	c	a	h	a	a	h	c	h	h	c	a	a
chr6	AC6B0100	Unigene27601	95	T	C	S	h	a	h	h	a	h	a	h	c	c	a	a	c	c	c	a	h	h	c	h	h	c	c	h	h	a	h	c	c	c	c	c	a	h	a	a	h	c	h	h	c	a	a
chr6	AC6B0110	Unigene4897	112	A	G	S	h	a	h	h	a	h	a	h	c	c	a	a	c	c	c	a	h	h	c	h	h	c	c	h	h	a	h	c	c	c	c	c	a	h	a	a	h	c	h	h	c	a	a
chr6	AC6B0120	Unigene24272	162	T	C	S	h	a	h	h	a	h	a	h	c	c	a	a	c	c	c	a	h	h	c	h	h	c	c	h	h	a	h	c	c	c	c	c	a	h	a	a	h	c	c	h	c	a	a
chr6	AC6B0120	Unigene637	268	C	A	S	h	a	h	h	a	h	a	h	c	c	a	a	c	c	c	a	h	h	c	h	h	c	c	h	h	a	h	c	c	c	c	c	a	h	a	a	h	c	c	h	c	a	a
chr6	AC6B0130	Unigene13104	522	A	G	S	h	a	h	h	a	h	a	h	c	c	a	a	c	c	c	a	h	h	c	c	h	c	c	h	h	a	h	c	c	c	c	c	a	h	a	a	h	c	c	h	c	a	a
chr6	AC6B0140	Unigene4326	1364	G	A	S	h	a	h	h	a	h	a	h	c	c	a	a	c	c	c	a	h	h	h	c	h	c	c	h	h	a	h	c	c	c	c	c	a	h	a	a	h	c	c	h	c	a	a
chr6	AC6B0150	Unigene27368	134	G	C	S	h	a	h	h	a	a	a	h	c	c	a	a	c	h	c	a	h	h	h	c	h	c	c	h	h	a	h	c	c	c	c	c	a	h	a	a	h	c	c	h	c	a	a
chr6	AC6B0160	Unigene11633	329	A	G	S	h	a	h	h	a	a	a	h	c	c	a	a	c	h	c	a	h	h	h	c	h	c	c	h	h	a	h	c	c	c	c	c	a	h	a	a	h	c	c	h	c	a	a
chr6	AC6B0160	Unigene21122	60	A	G	S	h	a	h	h	a	a	a	h	c	c	a	a	c	h	c	a	h	h	h	c	h	c	c	h	h	a	h	c	c	c	c	c	a	h	a	a	h	c	c	h	c	a	a
chr6	AC6B0170	Unigene16130	256	A	G	S	h	a	h	h	a	a	a	h	c	h	a	a	c	h	c	a	h	h	h	c	h	c	c	h	h	a	h	c	c	c	c	c	a	c	a	a	h	c	c	h	c	a	a
chr6	AC6B0170	Unigene7941	105	T	C	S	h	a	h	h	a	a	a	h	c	h	a	a	c	h	c	a	h	h	h	c	h	c	c	h	h	a	h	c	c	c	c	c	a	c	a	a	h	c	c	h	c	a	a
chr6	AC6B0180	Unigene3336	112	G	A	S	h	a	h	h	a	a	a	h	c	h	a	a	c	h	c	a	h	h	h	c	h	c	c	h	h	a	h	c	c	c	c	c	a	c	a	a	h	c	c	h	c	h	a
chr6	AC6B0190	Unigene30211	687	T	C	S	h	a	h	h	a	a	a	h	c	h	a	a	c	h	c	a	h	h	h	c	h	c	c	h	h	a	h	c	c	c	c	c	a	c	a	a	h	c	c	h	c	h	a
chr6	AC6B0200	Unigene10826	108	T	C	S	h	a	h	h	a	a	a	h	c	h	a	a	c	h	c	a	h	a	h	c	h	c	c	h	h	a	h	c	c	c	c	c	a	c	a	a	h	c	c	h	c	h	a
chr6	AC6B0200	Unigene30766	204	G	A	S	h	a	h	h	a	a	a	h	c	h	a	a	c	h	c	a	h	a	h	c	h	c	c	h	h	a	h	c	c	c	c	c	a	c	a	a	h	c	c	h	c	h	a
chr6	AC6B0210	Unigene11799	178	A	G	S	h	a	h	a	h	a	a	h	c	h	a	a	c	h	c	a	h	a	h	c	h	c	c	h	h	a	h	c	c	c	c	h	a	c	a	a	h	c	c	h	c	h	a
chr6	AC6B0210	Unigene11800	79	G	A	S	h	a	h	a	h	a	a	h	c	h	a	a	c	h	c	a	h	a	h	c	h	c	c	h	h	a	h	c	c	c	c	h	a	c	a	a	h	c	c	h	c	h	a
chr6	AC6B0210	Unigene25148	1064	C	G	S	h	a	h	a	h	a	a	h	c	h	a	a	c	h	c	a	h	a	h	c	h	c	c	h	h	a	h	c	c	c	c	h	a	c	a	a	h	c	c	h	c	h	a
chr6	AC6B0220	CL2756.Contig1	671	T	G	S	h	a	h	a	h	a	a	h	c	h	a	a	c	h	c	a	h	a	h	c	h	c	c	h	h	a	h	c	c	c	c	h	a	c	a	a	h	c	c	h	c	h	a
chr6	AC6B0230	Unigene16120	19	G	A	S	h	a	h	a	h	a	a	h	c	h	a	a	c	h	c	a	h	a	h	c	h	c	c	h	h	a	h	c	c	c	c	h	a	c	a	a	a	c	c	h	c	h	a
chr6	AC6B0230	Unigene23942	204	A	G	S	h	a	h	a	h	a	a	h	c	h	a	a	c	h	c	a	h	a	h	c	h	c	c	h	h	a	h	c	c	c	c	h	a	c	a	a	a	c	c	h	c	h	a
chr6	AC6B0230	Unigene24192	678	A	T	S	h	a	h	a	h	a	a	h	c	h	a	a	c	h	c	a	h	a	h	c	h	c	c	h	h	a	h	c	c	c	c	h	a	c	a	a	a	c	c	h	c	h	a
chr6	AC6B0230	Unigene28192	267	C	T	S	h	a	h	a	h	a	a	h	c	h	a	a	c	h	c	a	h	a	h	c	h	c	c	h	h	a	h	c	c	c	c	h	a	c	a	a	a	c	c	h	c	h	a
chr6	AC6B0240	CL4695.Contig1	153	A	G	S	a	a	h	a	h	a	a	h	c	h	a	a	c	h	c	a	h	a	h	c	h	c	c	c	h	a	h	c	c	c	c	h	a	c	a	a	a	c	c	h	c	h	a
chr6	AC6B0240	Unigene10304	533	A	G	S	a	a	h	a	h	a	a	h	c	h	a	a	c	h	c	a	h	a	h	c	h	c	c	c	h	a	h	c	c	c	c	h	a	c	a	a	a	c	c	h	c	h	a
chr6	AC6B0240	Unigene5413	61	A	G	S	a	a	h	a	h	a	a	h	c	h	a	a	c	h	c	a	h	a	h	c	h	c	c	c	h	a	h	c	c	c	c	h	a	c	a	a	a	c	c	h	c	h	a
chr6	AC6B0250	Unigene28381	436	C	T	S	h	a	h	h	h	a	a	h	c	h	a	a	c	h	c	a	h	a	h	c	h	c	c	c	h	a	h	c	c	c	c	h	a	c	a	a	a	c	c	h	c	h	a
chr6	AC6B0260	Unigene29031	123	A	C	S	h	a	h	h	h	a	a	h	c	h	a	a	c	h	h	a	h	a	h	c	h	c	c	c	h	a	h	c	c	h	c	h	a	c	a	a	a	c	c	h	c	h	a
chr6	AC6B0270	Unigene28718	156	T	A	S	h	a	h	h	h	a	a	h	c	h	a	a	c	h	h	a	h	a	h	c	h	h	h	c	h	a	a	c	c	h	h	h	a	c	a	a	a	c	c	h	c	h	a
chr6	AC6B0270	CL3363.Contig2	87	T	C	S	h	a	h	h	h	a	a	h	c	h	a	a	c	h	h	a	h	a	h	c	h	h	h	c	h	a	a	c	c	h	h	h	a	c	a	a	a	c	c	h	c	h	a
chr6	AC6B0270	Unigene176	62	G	C	S	h	a	h	h	h	a	a	h	c	h	a	a	c	h	h	a	h	a	h	c	h	h	h	c	h	a	a	c	c	h	h	h	a	c	a	a	a	c	c	h	c	h	a
chr6	AC6B0280	Unigene27839	156	A	G	S	h	a	h	h	c	h	a	h	c	h	a	a	c	h	h	a	h	a	h	h	h	h	h	c	h	a	a	c	c	h	h	h	a	c	a	a	a	c	c	h	c	h	a
chr6	AC6B0280	Unigene30943	23	C	T	S	h	a	h	h	c	h	a	h	c	h	a	a	c	h	h	a	h	a	h	h	h	h	h	c	h	a	a	c	c	h	h	h	a	c	a	a	a	c	c	h	c	h	a
chr6	AC6B0280	Unigene3657	69	C	A	S	h	a	h	h	c	h	a	h	c	h	a	a	c	h	h	a	h	a	h	h	h	h	h	c	h	a	a	c	c	h	h	h	a	c	a	a	a	c	c	h	c	h	a
chr6	AC6B0290	Unigene29166	362	G	A	S	h	a	h	h	c	h	a	h	c	h	a	a	c	h	h	a	h	a	h	h	h	a	h	c	h	a	a	c	c	h	h	h	a	c	a	a	h	c	c	h	c	c	a
chr6	AC6B0290	Unigene10501	1957	A	T	S	h	a	h	h	c	h	a	h	c	h	a	a	c	h	h	a	h	a	h	h	h	a	h	c	h	a	a	c	c	h	h	h	a	c	a	a	h	c	c	h	c	c	a
chr6	AC6B0290	Unigene13476	1040	A	G	S	h	a	h	h	c	h	a	h	c	h	a	a	c	h	h	a	h	a	h	h	h	a	h	c	h	a	a	c	c	h	h	h	a	c	a	a	h	c	c	h	c	c	a
chr6	AC6B0290	Unigene21542	212	A	G	S	h	a	h	h	c	h	a	h	c	h	a	a	c	h	h	a	h	a	h	h	h	a	h	c	h	a	a	c	c	h	h	h	a	c	a	a	h	c	c	h	c	c	a
chr6	AC6B0290	Unigene23024	120	A	T	S	h	a	h	h	c	h	a	h	c	h	a	a	c	h	h	a	h	a	h	h	h	a	h	c	h	a	a	c	c	h	h	h	a	c	a	a	h	c	c	h	c	c	a
chr6	AC6B0290	Unigene24913	2002	T	A	S	h	a	h	h	c	h	a	h	c	h	a	a	c	h	h	a	h	a	h	h	h	a	h	c	h	a	a	c	c	h	h	h	a	c	a	a	h	c	c	h	c	c	a
chr6	AC6B0290	Unigene28231	551	C	T	S	h	a	h	h	c	h	a	h	c	h	a	a	c	h	h	a	h	a	h	h	h	a	h	c	h	a	a	c	c	h	h	h	a	c	a	a	h	c	c	h	c	c	a
chr6	AC6B0290	Unigene30263	289	T	C	S	h	a	h	h	c	h	a	h	c	h	a	a	c	h	h	a	h	a	h	h	h	a	h	c	h	a	a	c	c	h	h	h	a	c	a	a	h	c	c	h	c	c	a
chr6	AC6B0290	Unigene4737	125	T	G	S	h	a	h	h	c	h	a	h	c	h	a	a	c	h	h	a	h	a	h	h	h	a	h	c	h	a	a	c	c	h	h	h	a	c	a	a	h	c	c	h	c	c	a
chr6	AC6B0290	Unigene5382	47	C	T	S	h	a	h	h	c	h	a	h	c	h	a	a	c	h	h	a	h	a	h	h	h	a	h	c	h	a	a	c	c	h	h	h	a	c	a	a	h	c	c	h	c	c	a
chr6	AC6B0290	Unigene772	571	G	T	S	h	a	h	h	c	h	a	h	c	h	a	a	c	h	h	a	h	a	h	h	h	a	h	c	h	a	a	c	c	h	h	h	a	c	a	a	h	c	c	h	c	c	a
chr6	AC6B0290	Unigene8923	206	A	G	S	h	a	h	h	c	h	a	h	c	h	a	a	c	h	h	a	h	a	h	h	h	a	h	c	h	a	a	c	c	h	h	h	a	c	a	a	h	c	c	h	c	c	a
chr6	AC6B0290	Unigene9239	45	G	C	S	h	a	h	h	c	h	a	h	c	h	a	a	c	h	h	a	h	a	h	h	h	a	h	c	h	a	a	c	c	h	h	h	a	c	a	a	h	c	c	h	c	c	a
chr6	AC6B0290	Unigene9675	84	A	G	S	h	a	h	h	c	h	a	h	c	h	a	a	c	h	h	a	h	a	h	h	h	a	h	c	h	a	a	c	c	h	h	h	a	c	a	a	h	c	c	h	c	c	a
chr6	AC6B0300	Unigene13863	757	C	T	S	h	a	h	h	c	h	a	h	c	h	a	a	c	h	h	a	h	a	h	h	h	a	h	c	h	a	a	c	c	h	h	h	a	c	a	a	h	c	c	h	c	c	a
chr6	AC6B0310	CL2213.Contig3	527	A	G	S	h	a	h	h	c	h	a	h	c	h	a	a	c	h	h	a	h	a	h	h	h	a	h	c	h	a	a	c	c	h	h	h	h	c	a	a	h	c	c	h	h	c	a
chr6	AC6B0310	Unigene26695	417	T	C	S	h	a	h	h	c	h	a	h	c	h	a	a	c	h	h	a	h	a	h	h	h	a	h	c	h	a	a	c	c	h	h	h	h	c	a	a	h	c	c	h	h	c	a
chr6	AC6B0320	CL625.Contig2	139	C	T	S	h	a	h	h	c	h	a	h	c	h	a	a	c	h	h	a	h	a	h	h	h	a	h	c	h	a	a	c	c	h	h	h	h	c	a	a	h	c	h	h	h	c	a
chr6	AC6B0320	Unigene27422	60	A	G	S	h	a	h	h	c	h	a	h	c	h	a	a	c	h	h	a	h	a	h	h	h	a	h	c	h	a	a	c	c	h	h	h	h	c	a	a	h	c	h	h	h	c	a
chr6	AC6B0330	Unigene27926	62	A	T	S	h	a	h	h	c	h	a	h	c	h	a	a	c	h	h	a	h	a	h	h	h	a	h	c	h	a	h	c	c	h	h	h	h	c	a	a	h	h	h	h	h	c	a
chr6	AC6B0340	CL3366.Contig2	46	A	C	S	h	a	h	h	c	h	a	h	c	h	a	a	c	h	h	a	h	a	h	h	h	a	h	c	h	a	h	c	c	h	h	h	h	c	a	a	h	h	h	h	h	c	a
chr6	AC6B0340	CL3477.Contig1	279	G	A	S	h	a	h	h	c	h	a	h	c	h	a	a	c	h	h	a	h	a	h	h	h	a	h	c	h	a	h	c	c	h	h	h	h	c	a	a	h	h	h	h	h	c	a
chr6	AC6B0340	CL6639.Contig1	158	A	G	S	h	a	h	h	c	h	a	h	c	h	a	a	c	h	h	a	h	a	h	h	h	a	h	c	h	a	h	c	c	h	h	h	h	c	a	a	h	h	h	h	h	c	a
chr6	AC6B0340	Unigene24292	146	G	T	S	h	a	h	h	c	h	a	h	c	h	a	a	c	h	h	a	h	a	h	h	h	a	h	c	h	a	h	c	c	h	h	h	h	c	a	a	h	h	h	h	h	c	a
chr6	AC6B0350	CL449.Contig1	902	G	T	S	h	a	h	h	c	h	a	h	c	h	h	a	c	h	h	a	h	a	h	a	h	a	h	c	h	a	h	c	c	h	h	h	h	c	a	a	h	h	h	h	h	c	a
chr6	AC6B0350	CL4877.Contig2	277	G	T	S	h	a	h	h	c	h	a	h	c	h	h	a	c	h	h	a	h	a	h	a	h	a	h	c	h	a	h	c	c	h	h	h	h	c	a	a	h	h	h	h	h	c	a
chr6	AC6B0350	CL5790.Contig1	833	C	A	S	h	a	h	h	c	h	a	h	c	h	h	a	c	h	h	a	h	a	h	a	h	a	h	c	h	a	h	c	c	h	h	h	h	c	a	a	h	h	h	h	h	c	a
chr6	AC6B0350	Unigene28187	328	T	A	S	h	a	h	h	c	h	a	h	c	h	h	a	c	h	h	a	h	a	h	a	h	a	h	c	h	a	h	c	c	h	h	h	h	c	a	a	h	h	h	h	h	c	a
chr6	AC6B0360	CL999.Contig3	467	G	A	S	h	a	h	h	c	h	a	h	c	h	h	a	c	h	h	a	h	a	h	a	h	a	h	c	h	a	h	c	c	h	h	h	h	c	a	h	h	h	h	h	h	c	a
chr6	AC6B0360	Unigene13349	206	T	C	S	h	a	h	h	c	h	a	h	c	h	h	a	c	h	h	a	h	a	h	a	h	a	h	c	h	a	h	c	c	h	h	h	h	c	a	h	h	h	h	h	h	c	a
chr6	AC6B0360	Unigene25449	413	G	A	S	h	a	h	h	c	h	a	h	c	h	h	a	c	h	h	a	h	a	h	a	h	a	h	c	h	a	h	c	c	h	h	h	h	c	a	h	h	h	h	h	h	c	a
chr6	AC6B0360	Unigene27907	192	A	G	S	h	a	h	h	c	h	a	h	c	h	h	a	c	h	h	a	h	a	h	a	h	a	h	c	h	a	h	c	c	h	h	h	h	c	a	h	h	h	h	h	h	c	a
chr6	AC6B0360	Unigene49	55	T	C	S	h	a	h	h	c	h	a	h	c	h	h	a	c	h	h	a	h	a	h	a	h	a	h	c	h	a	h	c	c	h	h	h	h	c	a	h	h	h	h	h	h	c	a
chr6	AC6B0360	Unigene709	1361	T	C	S	h	a	h	h	c	h	a	h	c	h	h	a	c	h	h	a	h	a	h	a	h	a	h	c	h	a	h	c	c	h	h	h	h	c	a	h	h	h	h	h	h	c	a
chr6	AC6B0370	Unigene27462	232	G	T	S	h	a	h	h	c	h	a	h	c	h	h	a	c	h	h	a	h	a	h	a	h	h	a	c	h	a	h	c	c	h	h	h	h	c	a	h	h	h	h	h	h	c	a
chr6	AC6B0380	Unigene12484	436	C	T	S	h	a	h	h	c	h	a	h	c	h	h	a	c	h	a	a	h	a	h	a	h	h	a	c	h	a	h	c	c	h	h	h	h	c	a	h	h	h	h	h	h	c	a
chr6	AC6B0390	Unigene27450	1183	G	C	S	h	a	h	h	c	h	a	h	c	h	h	a	c	h	a	a	h	a	h	a	h	h	a	c	h	a	h	c	c	h	h	h	h	c	a	c	h	h	h	h	h	c	a
chr6	AC6B0390	Unigene27957	17	T	C	S	h	a	h	h	c	h	a	h	c	h	h	a	c	h	a	a	h	a	h	a	h	h	a	c	h	a	h	c	c	h	h	h	h	c	a	c	h	h	h	h	h	c	a
chr6	AC6B0400	CL5155.Contig1	112	C	T	S	h	a	h	h	c	h	a	h	c	h	h	a	c	h	a	a	h	a	h	a	h	h	a	c	h	a	h	c	c	h	h	h	h	c	a	c	h	h	a	h	h	c	a
chr6	AC6B0400	Unigene11455	1231	G	C	S	h	a	h	h	c	h	a	h	c	h	h	a	c	h	a	a	h	a	h	a	h	h	a	c	h	a	h	c	c	h	h	h	h	c	a	c	h	h	a	h	h	c	a
chr6	AC6B0400	Unigene11693	409	T	C	S	h	a	h	h	c	h	a	h	c	h	h	a	c	h	a	a	h	a	h	a	h	h	a	c	h	a	h	c	c	h	h	h	h	c	a	c	h	h	a	h	h	c	a
chr6	AC6B0410	CL5934.Contig1	471	G	A	S	h	a	h	h	c	h	a	h	h	h	h	a	c	h	a	a	h	a	h	a	h	h	a	c	h	a	h	c	c	h	h	h	h	c	a	c	h	h	a	h	h	c	a
chr6	AC6B0420	Unigene19135	393	C	A	S	h	a	h	h	c	h	a	h	h	h	h	a	c	h	a	a	h	a	h	a	h	h	a	c	h	a	h	c	c	h	h	h	h	c	a	c	h	h	a	h	h	c	a
chr6	AC6B0420	Unigene19136	168	A	G	S	h	a	h	h	c	h	a	h	h	h	h	a	c	h	a	a	h	a	h	a	h	h	a	c	h	a	h	c	c	h	h	h	h	c	a	c	h	h	a	h	h	c	a
chr6	AC6B0430	CL1086.Contig4	83	T	C	S	h	a	h	h	c	h	a	h	h	h	h	a	c	h	a	a	h	a	a	a	h	h	a	c	h	a	h	c	h	h	h	h	h	c	a	c	h	h	a	h	h	c	a
chr6	AC6B0430	CL5560.Contig1	36	G	A	S	h	a	h	h	c	h	a	h	h	h	h	a	c	h	a	a	h	a	a	a	h	h	a	c	h	a	h	c	h	h	h	h	h	c	a	c	h	h	a	h	h	c	a
chr6	AC6B0430	Unigene16687	91	C	G	S	h	a	h	h	c	h	a	h	h	h	h	a	c	h	a	a	h	a	a	a	h	h	a	c	h	a	h	c	h	h	h	h	h	c	a	c	h	h	a	h	h	c	a
chr6	AC6B0430	Unigene16688	700	A	G	S	h	a	h	h	c	h	a	h	h	h	h	a	c	h	a	a	h	a	a	a	h	h	a	c	h	a	h	c	h	h	h	h	h	c	a	c	h	h	a	h	h	c	a
chr6	AC6B0430	Unigene33515	123	C	T	S	h	a	h	h	c	h	a	h	h	h	h	a	c	h	a	a	h	a	a	a	h	h	a	c	h	a	h	c	h	h	h	h	h	c	a	c	h	h	a	h	h	c	a
chr6	AC6B0430	Unigene8397	116	A	G	S	h	a	h	h	c	h	a	h	h	h	h	a	c	h	a	a	h	a	a	a	h	h	a	c	h	a	h	c	h	h	h	h	h	c	a	c	h	h	a	h	h	c	a
chr6	AC6B0440	Unigene28317	52	A	G	S	h	a	h	h	c	h	a	h	h	h	h	a	c	h	a	a	h	a	a	a	h	h	a	c	h	a	h	c	h	h	h	h	h	c	a	c	h	h	a	h	h	c	a
chr6	AC6B0440	Unigene29851	444	G	A	S	h	a	h	h	c	h	a	h	h	h	h	a	c	h	a	a	h	a	a	a	h	h	a	c	h	a	h	c	h	h	h	h	h	c	a	c	h	h	a	h	h	c	a
chr6	AC6B0450	Unigene11556	12	A	G	S	h	a	h	h	c	h	a	h	h	h	h	a	c	h	a	h	h	a	a	a	h	h	a	c	h	a	h	c	h	h	h	h	h	c	a	c	h	h	a	h	h	c	a
chr6	AC6B0450	Unigene24131	434	T	C	S	h	a	h	h	c	h	a	h	h	h	h	a	c	h	a	h	h	a	a	a	h	h	a	c	h	a	h	c	h	h	h	h	h	c	a	c	h	h	a	h	h	c	a
chr6	AC6B0450	Unigene27322	362	T	A	S	h	a	h	h	c	h	a	h	h	h	h	a	c	h	a	h	h	a	a	a	h	h	a	c	h	a	h	c	h	h	h	h	h	c	a	c	h	h	a	h	h	c	a
chr6	AC6B0450	Unigene9241	487	G	T	S	h	a	h	h	c	h	a	h	h	h	h	a	c	h	a	h	h	a	a	a	h	h	a	c	h	a	h	c	h	h	h	h	h	c	a	c	h	h	a	h	h	c	a
chr6	AC6B0460	Unigene31157	129	C	T	S	h	a	h	h	c	h	a	h	h	h	h	a	c	h	a	h	h	a	a	a	h	h	a	c	h	a	h	c	h	h	h	h	h	c	a	c	h	h	a	h	h	c	a
chr6	AC6B0470	Unigene17093	68	T	C	S	h	a	h	h	c	h	a	h	h	h	h	a	c	h	a	h	h	a	a	a	a	h	a	c	h	a	h	c	h	h	h	h	h	c	a	c	h	h	a	h	h	c	a
chr6	AC6B0480	Unigene23452	437	T	C	S	h	a	h	h	c	h	a	h	a	h	h	a	c	h	a	h	h	a	a	a	a	h	a	c	h	a	h	c	h	h	h	h	h	c	a	c	h	h	a	h	h	c	a
chr6	AC6B0480	CL6566.Contig1	792	A	G	S	h	a	h	h	c	h	a	h	a	h	h	a	c	h	a	h	h	a	a	a	a	h	a	c	h	a	h	c	h	h	h	h	h	c	a	c	h	h	a	h	h	c	a
chr6	AC6B0490	Unigene26355	301	A	G	S	h	a	h	h	c	h	a	h	a	h	h	a	c	h	a	h	h	a	a	a	a	h	a	c	h	a	h	c	h	h	h	h	h	c	a	c	h	h	a	h	h	c	a
chr6	AC6B0500	Unigene21851	491	C	G	S	h	a	h	h	c	h	a	h	a	h	h	h	h	h	a	h	h	a	a	a	a	h	a	c	h	a	h	h	h	h	h	h	h	c	a	c	h	h	a	h	h	c	a
chr6	AC6B0510	Unigene29299	586	C	T	S	h	a	h	h	c	h	a	h	a	h	h	h	h	h	a	h	h	a	a	a	a	h	a	c	h	a	h	h	h	h	h	h	h	c	a	c	h	h	a	h	h	c	a
chr6	AC6B0520	Unigene12229	1547	A	G	S	h	a	h	h	c	h	a	h	a	h	h	h	h	h	a	h	h	a	a	a	a	h	a	c	h	a	h	a	h	h	h	h	h	c	a	c	h	h	a	h	h	c	a
chr6	AC6B0520	Unigene21759	78	A	G	S	h	a	h	h	c	h	a	h	a	h	h	h	h	h	a	h	h	a	a	a	a	h	a	c	h	a	h	a	h	h	h	h	h	c	a	c	h	h	a	h	h	c	a
chr6	AC6B0520	Unigene21760	442	C	A	S	h	a	h	h	c	h	a	h	a	h	h	h	h	h	a	h	h	a	a	a	a	h	a	c	h	a	h	a	h	h	h	h	h	c	a	c	h	h	a	h	h	c	a
chr6	AC6B0520	Unigene28247	500	T	C	S	h	a	h	h	c	h	a	h	a	h	h	h	h	h	a	h	h	a	a	a	a	h	a	c	h	a	h	a	h	h	h	h	h	c	a	c	h	h	a	h	h	c	a
chr6	AC6B0520	Unigene10558	854	C	T	S	h	a	h	h	c	h	a	h	a	h	h	h	h	h	a	h	h	a	a	a	a	h	a	c	h	a	h	a	h	h	h	h	h	c	a	c	h	h	a	h	h	c	a
chr6	AC6B0530	CL4942.Contig3	137	A	G	S	h	a	h	h	c	h	a	h	a	h	h	h	h	h	a	h	h	a	a	a	a	h	a	c	h	a	h	a	h	h	h	a	h	c	a	c	h	h	a	h	a	c	a
chr6	AC6B0530	Unigene26463	125	C	T	S	h	a	h	h	c	h	a	h	a	h	h	h	h	h	a	h	h	a	a	a	a	h	a	c	h	a	h	a	h	h	h	a	h	c	a	c	h	h	a	h	a	c	a
chr6	AC6B0530	Unigene27738	132	A	G	S	h	a	h	h	c	h	a	h	a	h	h	h	h	h	a	h	h	a	a	a	a	h	a	c	h	a	h	a	h	h	h	a	h	c	a	c	h	h	a	h	a	c	a
chr6	AC6B0530	Unigene27902	560	G	T	S	h	a	h	h	c	h	a	h	a	h	h	h	h	h	a	h	h	a	a	a	a	h	a	c	h	a	h	a	h	h	h	a	h	c	a	c	h	h	a	h	a	c	a
chr6	AC6B0530	Unigene18548	50	T	C	S	h	a	h	h	c	h	a	h	a	h	h	h	h	h	a	h	h	a	a	a	a	h	a	c	h	a	h	a	h	h	h	a	h	c	a	c	h	h	a	h	a	c	a
chr6	AC6B0540	Unigene10891	534	T	C	S	h	a	h	h	c	h	a	h	a	h	h	h	h	h	a	h	h	a	a	a	a	h	a	c	h	a	h	a	h	h	h	a	h	c	a	c	h	h	a	h	a	c	a
chr6	AC6B0540	Unigene21228	582	C	T	S	h	a	h	h	c	h	a	h	a	h	h	h	h	h	a	h	h	a	a	a	a	h	a	c	h	a	h	a	h	h	h	a	h	c	a	c	h	h	a	h	a	c	a
chr6	AC6B0540	Unigene27393	163	A	G	S	h	a	h	h	c	h	a	h	a	h	h	h	h	h	a	h	h	a	a	a	a	h	a	c	h	a	h	a	h	h	h	a	h	c	a	c	h	h	a	h	a	c	a
chr6	AC6B0540	Unigene27561	169	C	T	S	h	a	h	h	c	h	a	h	a	h	h	h	h	h	a	h	h	a	a	a	a	h	a	c	h	a	h	a	h	h	h	a	h	c	a	c	h	h	a	h	a	c	a
chr6	AC6B0540	Unigene353	1019	A	G	S	h	a	h	h	c	h	a	h	a	h	h	h	h	h	a	h	h	a	a	a	a	h	a	c	h	a	h	a	h	h	h	a	h	c	a	c	h	h	a	h	a	c	a
chr6	AC6B0540	Unigene6723	94	A	T	S	h	a	h	h	c	h	a	h	a	h	h	h	h	h	a	h	h	a	a	a	a	h	a	c	h	a	h	a	h	h	h	a	h	c	a	c	h	h	a	h	a	c	a
chr6	AC6B0550	CL864.Contig1	1207	A	T	S	h	a	h	h	c	h	a	h	a	h	h	h	h	h	a	h	h	a	a	a	a	h	a	c	h	a	h	a	h	h	h	a	h	c	a	c	h	h	a	h	a	c	a
chr6	AC6B0550	Unigene27212	115	T	C	S	h	a	h	h	c	h	a	h	a	h	h	h	h	h	a	h	h	a	a	a	a	h	a	c	h	a	h	a	h	h	h	a	h	c	a	c	h	h	a	h	a	c	a
chr6	AC6B0550	Unigene27831	206	A	C	S	h	a	h	h	c	h	a	h	a	h	h	h	h	h	a	h	h	a	a	a	a	h	a	c	h	a	h	a	h	h	h	a	h	c	a	c	h	h	a	h	a	c	a
chr6	AC6B0550	Unigene4269	115	T	C	S	h	a	h	h	c	h	a	h	a	h	h	h	h	h	a	h	h	a	a	a	a	h	a	c	h	a	h	a	h	h	h	a	h	c	a	c	h	h	a	h	a	c	a
chr6	AC6B0560	CL3102.Contig1	268	G	A	S	h	a	h	h	c	h	a	c	a	h	h	h	h	h	a	h	h	a	a	a	a	h	a	c	h	a	h	a	h	h	h	a	h	c	a	c	h	h	a	h	a	c	a
chr6	AC6B0560	Unigene12406	436	A	G	S	h	a	h	h	c	h	a	c	a	h	h	h	h	h	a	h	h	a	a	a	a	h	a	c	h	a	h	a	h	h	h	a	h	c	a	c	h	h	a	h	a	c	a
chr6	AC6B0560	Unigene13142	104	G	A	S	h	a	h	h	c	h	a	c	a	h	h	h	h	h	a	h	h	a	a	a	a	h	a	c	h	a	h	a	h	h	h	a	h	c	a	c	h	h	a	h	a	c	a
chr6	AC6B0560	Unigene22659	397	A	G	S	h	a	h	h	c	h	a	c	a	h	h	h	h	h	a	h	h	a	a	a	a	h	a	c	h	a	h	a	h	h	h	a	h	c	a	c	h	h	a	h	a	c	a
chr6	AC6B0560	Unigene24897	204	C	T	S	h	a	h	h	c	h	a	c	a	h	h	h	h	h	a	h	h	a	a	a	a	h	a	c	h	a	h	a	h	h	h	a	h	c	a	c	h	h	a	h	a	c	a
chr6	AC6B0560	Unigene29189	171	G	A	S	h	a	h	h	c	h	a	c	a	h	h	h	h	h	a	h	h	a	a	a	a	h	a	c	h	a	h	a	h	h	h	a	h	c	a	c	h	h	a	h	a	c	a
chr6	AC6B0560	Unigene681	1371	G	A	S	h	a	h	h	c	h	a	c	a	h	h	h	h	h	a	h	h	a	a	a	a	h	a	c	h	a	h	a	h	h	h	a	h	c	a	c	h	h	a	h	a	c	a
chr6	AC6B0570	Unigene23483	137	G	A	S	h	a	h	h	c	h	a	c	a	h	h	h	h	h	a	h	h	a	a	a	a	h	a	c	h	a	h	a	h	h	h	a	h	c	a	c	h	h	a	c	a	c	a
chr6	AC6B0580	Unigene10160	646	C	T	S	h	a	h	h	c	h	a	c	a	h	h	h	h	h	a	h	h	a	a	a	a	h	a	c	h	a	h	a	h	h	h	a	h	c	a	c	h	h	h	c	a	c	a
chr6	AC6B0580	Unigene28298	1077	C	T	S	h	a	h	h	c	h	a	c	a	h	h	h	h	h	a	h	h	a	a	a	a	h	a	c	h	a	h	a	h	h	h	a	h	c	a	c	h	h	h	c	a	c	a
chr6	AC6B0590	Unigene21147	61	T	G	S	h	a	h	h	c	h	a	h	a	h	h	h	h	h	a	h	h	a	a	a	a	h	a	h	h	a	c	a	h	h	h	a	h	c	a	c	h	h	h	c	a	c	a
chr6	AC6B0590	Unigene28268	413	T	A	S	h	a	h	h	c	h	a	h	a	h	h	h	h	h	a	h	h	a	a	a	a	h	a	h	h	a	c	a	h	h	h	a	h	c	a	c	h	h	h	c	a	c	a
chr6	AC6B0600	Unigene27733	370	T	C	S	h	a	h	h	c	h	a	h	a	h	h	h	h	h	a	h	h	a	a	a	a	h	a	h	h	a	c	a	h	h	h	a	h	c	a	c	h	h	h	c	a	c	a
chr6	AC6B0610	CL2715.Contig1	428	C	T	S	h	a	h	h	c	h	a	h	a	h	h	h	h	h	a	h	h	a	a	a	a	h	a	h	h	a	c	a	h	h	h	a	h	c	a	c	h	h	h	c	a	c	a
chr6	AC6B0610	Unigene3776	36	C	T	S	h	a	h	h	c	h	a	h	a	h	h	h	h	h	a	h	h	a	a	a	a	h	a	h	h	a	c	a	h	h	h	a	h	c	a	c	h	h	h	c	a	c	a
chr6	AC6B0610	Unigene6984	78	G	A	S	h	a	h	h	c	h	a	h	a	h	h	h	h	h	a	h	h	a	a	a	a	h	a	h	h	a	c	a	h	h	h	a	h	c	a	c	h	h	h	c	a	c	a
chr6	AC6B0610	Unigene8975	1048	C	T	S	h	a	h	h	c	h	a	h	a	h	h	h	h	h	a	h	h	a	a	a	a	h	a	h	h	a	c	a	h	h	h	a	h	c	a	c	h	h	h	c	a	c	a
chr6	AC6B0610	Unigene9094	390	A	C	S	h	a	h	h	c	h	a	h	a	h	h	h	h	h	a	h	h	a	a	a	a	h	a	h	h	a	c	a	h	h	h	a	h	c	a	c	h	h	h	c	a	c	a
chr6	AC6B0620	Unigene11855	467	A	G	S	h	a	h	h	c	h	a	h	a	h	h	h	h	h	a	h	h	a	a	a	a	h	a	h	h	a	c	a	h	h	h	a	h	c	a	c	h	h	h	c	a	c	a
chr6	AC6B0620	Unigene13219	310	G	T	S	h	a	h	h	c	h	a	h	a	h	h	h	h	h	a	h	h	a	a	a	a	h	a	h	h	a	c	a	h	h	h	a	h	c	a	c	h	h	h	c	a	c	a
chr6	AC6B0620	Unigene29920	296	A	G	S	h	a	h	h	c	h	a	h	a	h	h	h	h	h	a	h	h	a	a	a	a	h	a	h	h	a	c	a	h	h	h	a	h	c	a	c	h	h	h	c	a	c	a
chr6	AC6B0630	CL3605.Contig1	83	G	A	S	h	a	h	h	c	h	a	h	a	h	h	h	h	h	a	h	h	a	a	a	a	h	a	h	h	a	c	a	h	h	h	a	h	c	a	c	h	h	h	c	a	c	a
chr6	AC6B0640	Unigene10939	1030	A	C	S	h	a	h	h	c	h	a	h	a	h	h	h	h	h	a	h	h	a	a	a	a	h	a	h	h	a	c	a	h	h	h	a	h	c	h	c	h	h	h	c	a	c	a
chr6	AC6B0650	CL39.Contig3	627	A	G	S	h	a	h	h	c	h	a	h	a	h	h	h	h	h	a	h	h	a	a	a	a	h	h	h	h	a	c	a	h	h	h	a	h	c	h	c	h	h	h	c	a	c	a
chr6	AC6B0650	Unigene10572	73	A	G	S	h	a	h	h	c	h	a	h	a	h	h	h	h	h	a	h	h	a	a	a	a	h	h	h	h	a	c	a	h	h	h	a	h	c	h	c	h	h	h	c	a	c	a
chr6	AC6B0660	Unigene12604	383	T	A	S	h	a	h	h	c	h	a	h	a	c	h	h	h	h	a	h	h	a	a	a	a	h	h	h	h	a	c	a	h	h	h	a	c	c	h	c	h	h	h	c	a	c	a
chr6	AC6B0660	Unigene27879	1022	T	C	S	h	a	h	h	c	h	a	h	a	c	h	h	h	h	a	h	h	a	a	a	a	h	h	h	h	a	c	a	h	h	h	a	c	c	h	c	h	h	h	c	a	c	a
chr6	AC6B0670	Unigene28481	1510	T	C	S	h	a	h	h	c	h	a	h	a	c	h	h	h	c	a	h	h	a	a	a	a	h	h	h	h	a	c	a	h	h	h	a	c	c	h	c	h	h	h	c	a	c	a
chr6	AC6B0680	Unigene28149	51	T	A	S	h	a	c	h	c	h	a	h	a	c	h	h	h	c	a	h	h	a	a	a	a	h	h	h	h	a	c	a	h	h	h	a	c	c	h	c	h	h	h	c	a	c	a
chr6	AC6B0690	CL1073.Contig2	157	A	T	S	h	a	c	h	c	h	a	h	a	c	h	h	h	c	a	h	h	a	a	a	a	h	h	h	h	a	c	a	h	h	h	a	c	c	h	c	h	h	h	c	a	c	a
chr6	AC6B0690	CL5279.Contig1	252	T	C	S	h	a	c	h	c	h	a	h	a	c	h	h	h	c	a	h	h	a	a	a	a	h	h	h	h	a	c	a	h	h	h	a	c	c	h	c	h	h	h	c	a	c	a
chr6	AC6B0700	CL1316.Contig1	80	C	T	S	h	a	c	h	c	h	a	h	h	c	h	h	h	c	a	h	h	a	a	a	a	h	h	h	h	a	c	a	h	h	h	a	c	c	h	c	h	h	h	c	a	c	a
chr6	AC6B0700	Unigene6314	165	C	A	S	h	a	c	h	c	h	a	h	h	c	h	h	h	c	a	h	h	a	a	a	a	h	h	h	h	a	c	a	h	h	h	a	c	c	h	c	h	h	h	c	a	c	a
chr6	AC6B0700	Unigene8671	482	A	G	S	h	a	c	h	c	h	a	h	h	c	h	h	h	c	a	h	h	a	a	a	a	h	h	h	h	a	c	a	h	h	h	a	c	c	h	c	h	h	h	c	a	c	a
chr6	AC6B0710	Unigene22543	138	C	T	S	h	a	c	h	c	h	a	h	h	c	h	h	h	c	a	h	h	a	a	a	a	h	h	h	h	a	c	a	h	h	h	a	c	c	h	c	h	h	h	c	a	c	a
chr6	AC6B0710	Unigene22544	282	C	T	S	h	a	c	h	c	h	a	h	h	c	h	h	h	c	a	h	h	a	a	a	a	h	h	h	h	a	c	a	h	h	h	a	c	c	h	c	h	h	h	c	a	c	a
chr6	AC6B0720	CL4614.Contig1	373	G	A	S	h	a	c	h	c	h	a	h	h	c	h	h	h	c	a	h	h	a	a	a	a	h	h	h	h	a	c	a	h	h	h	a	c	c	h	c	h	h	h	c	a	c	a
chr6	AC6B0720	Unigene22008	955	A	T	S	h	a	c	h	c	h	a	h	h	c	h	h	h	c	a	h	h	a	a	a	a	h	h	h	h	a	c	a	h	h	h	a	c	c	h	c	h	h	h	c	a	c	a
chr6	AC6B0720	Unigene22562	330	A	T	S	h	a	c	h	c	h	a	h	h	c	h	h	h	c	a	h	h	a	a	a	a	h	h	h	h	a	c	a	h	h	h	a	c	c	h	c	h	h	h	c	a	c	a
chr6	AC6B0720	Unigene24917	1348	G	A	S	h	a	c	h	c	h	a	h	h	c	h	h	h	c	a	h	h	a	a	a	a	h	h	h	h	a	c	a	h	h	h	a	c	c	h	c	h	h	h	c	a	c	a
chr6	AC6B0720	Unigene27567	403	T	C	S	h	a	c	h	c	h	a	h	h	c	h	h	h	c	a	h	h	a	a	a	a	h	h	h	h	a	c	a	h	h	h	a	c	c	h	c	h	h	h	c	a	c	a
chr6	AC6B0720	Unigene27671	274	C	T	S	h	a	c	h	c	h	a	h	h	c	h	h	h	c	a	h	h	a	a	a	a	h	h	h	h	a	c	a	h	h	h	a	c	c	h	c	h	h	h	c	a	c	a
chr6	AC6B0720	Unigene27919	290	C	A	S	h	a	c	h	c	h	a	h	h	c	h	h	h	c	a	h	h	a	a	a	a	h	h	h	h	a	c	a	h	h	h	a	c	c	h	c	h	h	h	c	a	c	a
chr6	AC6B0720	Unigene8201	84	T	C	S	h	a	c	h	c	h	a	h	h	c	h	h	h	c	a	h	h	a	a	a	a	h	h	h	h	a	c	a	h	h	h	a	c	c	h	c	h	h	h	c	a	c	a
chr6	AC6B0720	Unigene9471	132	A	G	S	h	a	c	h	c	h	a	h	h	c	h	h	h	c	a	h	h	a	a	a	a	h	h	h	h	a	c	a	h	h	h	a	c	c	h	c	h	h	h	c	a	c	a
chr6	AC6B0730	CL2652.Contig1	490	T	C	S	h	h	c	h	c	h	a	h	h	c	h	h	h	c	a	h	h	a	a	a	a	h	h	h	h	a	c	a	h	h	h	a	c	c	h	c	h	h	h	c	a	c	a
chr6	AC6B0730	Unigene28698	131	A	G	S	h	h	c	h	c	h	a	h	h	c	h	h	h	c	a	h	h	a	a	a	a	h	h	h	h	a	c	a	h	h	h	a	c	c	h	c	h	h	h	c	a	c	a
chr6	AC6B0740	CL6205.Contig1	220	A	C	S	h	h	c	h	c	h	a	h	h	c	h	h	h	c	a	h	h	a	a	a	a	h	h	h	h	a	c	a	h	h	h	a	c	c	h	c	h	h	h	c	a	c	a
chr6	AC6B0740	Unigene27852	165	T	C	S	h	h	c	h	c	h	a	h	h	c	h	h	h	c	a	h	h	a	a	a	a	h	h	h	h	a	c	a	h	h	h	a	c	c	h	c	h	h	h	c	a	c	a
chr6	AC6B0740	Unigene29969	441	C	T	S	h	h	c	h	c	h	a	h	h	c	h	h	h	c	a	h	h	a	a	a	a	h	h	h	h	a	c	a	h	h	h	a	c	c	h	c	h	h	h	c	a	c	a
chr6	AC6B0750	Unigene13901	376	A	G	S	h	h	c	h	c	h	a	h	h	c	h	h	h	c	a	h	h	a	a	a	a	h	h	h	h	a	c	a	h	h	h	a	c	c	h	c	h	h	h	c	a	c	a
chr6	AC6B0750	Unigene24148	406	G	A	S	h	h	c	h	c	h	a	h	h	c	h	h	h	c	a	h	h	a	a	a	a	h	h	h	h	a	c	a	h	h	h	a	c	c	h	c	h	h	h	c	a	c	a
chr6	AC6B0760	Unigene25956	404	A	G	S	h	h	c	h	c	h	a	h	h	c	h	h	h	c	a	h	h	a	a	a	a	h	h	h	h	a	c	a	h	h	h	a	c	c	h	c	h	h	h	c	a	c	a
chr6	AC6B0760	Unigene28523	448	G	A	S	h	h	c	h	c	h	a	h	h	c	h	h	h	c	a	h	h	a	a	a	a	h	h	h	h	a	c	a	h	h	h	a	c	c	h	c	h	h	h	c	a	c	a
chr6	AC6B0770	CL2113.Contig1	142	C	T	S	h	h	c	h	c	h	a	h	h	h	h	h	h	c	a	h	h	a	a	a	a	h	c	h	h	a	c	a	h	h	h	a	c	c	h	c	h	h	h	c	a	c	a
chr6	AC6B0780	Unigene8826	233	C	G	S	h	h	c	h	c	h	a	h	h	h	h	h	h	c	a	h	h	a	a	a	a	h	c	h	h	h	c	a	h	h	h	a	c	c	h	c	h	h	h	c	a	c	a
chr6	AC6B0790	Unigene12919	1006	A	T	S	h	h	c	h	c	h	a	h	h	h	h	h	h	c	a	h	h	a	a	a	a	h	c	h	h	h	c	a	h	h	h	a	c	c	h	c	h	h	h	c	a	c	a
chr6	AC6B0790	Unigene16418	140	A	G	S	h	h	c	h	c	h	a	h	h	h	h	h	h	c	a	h	h	a	a	a	a	h	c	h	h	h	c	a	h	h	h	a	c	c	h	c	h	h	h	c	a	c	a
chr6	AC6B0790	Unigene25562	141	G	A	S	h	h	c	h	c	h	a	h	h	h	h	h	h	c	a	h	h	a	a	a	a	h	c	h	h	h	c	a	h	h	h	a	c	c	h	c	h	h	h	c	a	c	a
chr6	AC6B0790	Unigene29144	904	A	G	S	h	h	c	h	c	h	a	h	h	h	h	h	h	c	a	h	h	a	a	a	a	h	c	h	h	h	c	a	h	h	h	a	c	c	h	c	h	h	h	c	a	c	a
chr6	AC6B0800	CL658.Contig1	247	G	T	S	h	h	c	h	c	h	a	h	h	h	h	h	h	c	a	h	h	a	a	a	a	h	c	h	h	h	c	a	h	h	h	a	c	c	h	c	h	h	h	c	a	c	a
chr6	AC6B0800	Unigene13575	915	G	A	S	h	h	c	h	h	h	a	h	h	h	h	h	h	c	a	h	h	a	a	a	a	h	c	h	h	h	c	a	h	h	h	a	c	c	h	c	h	h	h	c	a	c	a
chr6	AC6B0800	Unigene4466	451	A	G	S	h	h	c	h	h	h	a	h	h	h	h	h	h	c	a	h	h	a	a	a	a	h	c	a	h	h	c	a	h	h	h	a	c	h	h	c	h	h	h	c	a	c	a
chr7	AC7B0010	CL2274.Contig1	379	G	C	S	h	h	c	h	a	a	c	a	h	a	c	c	h	c	h	h	h	c	h	h	h	h	c	c	a	c	h	h	h	a	c	a	c	h	a	a	h	h	c	h	h	c	a
chr7	AC7B0020	Unigene21239	383	G	A	S	h	h	c	h	a	a	c	a	c	a	h	c	h	c	h	h	h	c	h	a	h	h	c	c	a	c	h	h	h	a	c	a	c	h	a	a	h	h	c	h	h	c	a
chr7	AC7B0030	Unigene27176	373	T	C	S	h	h	c	h	a	a	c	a	c	a	h	c	h	c	h	h	h	c	h	a	h	h	c	c	a	c	h	h	h	a	c	a	c	h	a	a	h	h	c	h	h	c	a
chr7	AC7B0040	Unigene12138	40	T	C	S	h	h	c	h	a	a	c	a	c	a	h	c	h	c	a	h	h	c	h	a	h	h	c	c	a	c	h	h	h	h	c	a	c	h	a	a	h	h	c	h	h	c	a
chr7	AC7B0040	Unigene28241	346	C	T	S	h	h	c	h	a	a	c	a	c	a	h	c	h	c	a	h	h	c	h	a	h	h	c	c	a	c	h	h	h	h	c	a	c	h	a	a	h	h	c	h	h	c	a
chr7	AC7B0050	CL3604.Contig5	454	G	A	S	h	h	c	h	a	a	c	a	c	a	h	c	h	c	a	h	a	c	h	a	h	h	c	c	a	c	h	h	h	h	c	a	c	h	a	a	h	h	c	h	h	c	a
chr7	AC7B0050	Unigene27222	268	G	A	S	h	h	c	h	a	a	c	a	c	a	h	c	h	c	a	h	a	c	h	a	h	h	c	c	a	c	h	h	h	h	c	a	c	h	a	a	h	h	c	h	h	c	a
chr7	AC7B0060	CL3852.Contig1	85	T	C	S	h	h	c	a	a	a	c	a	c	a	h	c	h	c	a	h	a	c	h	a	h	h	c	c	a	c	h	h	h	h	c	a	c	h	a	a	h	h	c	h	h	c	a
chr7	AC7B0060	Unigene12296	275	A	G	S	h	h	c	a	a	a	c	a	c	a	h	c	h	c	a	h	a	c	h	a	h	h	c	c	a	c	h	h	h	h	c	a	c	h	a	a	h	h	c	h	h	c	a
chr7	AC7B0060	Unigene16938	79	A	C	S	h	h	c	a	a	a	c	a	c	a	h	c	h	c	a	h	a	c	h	a	h	h	c	c	a	c	h	h	h	h	c	a	c	h	a	a	h	h	c	h	h	c	a
chr7	AC7B0060	Unigene7925	865	G	A	S	h	h	c	a	a	a	c	a	c	a	h	c	h	c	a	h	a	c	h	a	h	h	c	c	a	c	h	h	h	h	c	a	c	h	a	a	h	h	c	h	h	c	a
chr7	AC7B0070	Unigene25325_3	610	T	C	S	h	h	c	a	a	a	c	a	c	a	h	c	h	c	a	h	a	c	h	a	h	h	c	c	a	c	h	h	h	h	c	a	c	h	a	a	h	h	c	h	h	c	a
chr7	AC7B0080	Unigene8017	385	G	A	S	h	h	c	a	a	a	h	a	c	a	h	c	h	c	a	h	a	c	h	a	h	h	c	c	a	c	h	h	h	h	c	a	c	h	a	a	h	h	c	h	h	c	a
chr7	AC7B0090	CL1278.Contig2	311	A	G	S	h	h	h	a	a	a	h	a	c	a	h	c	h	c	a	h	a	c	h	a	h	h	c	c	a	c	h	h	h	h	c	a	c	h	a	a	h	h	c	h	h	c	a
chr7	AC7B0090	CL2087.Contig1	184	G	T	S	h	h	h	a	a	a	h	a	c	a	h	c	h	c	a	h	a	c	h	a	h	h	c	c	a	c	h	h	h	h	c	a	c	h	a	a	h	h	c	h	h	c	a
chr7	AC7B0090	CL2757.Contig1	179	G	A	S	h	h	h	a	a	a	h	a	c	a	h	c	h	c	a	h	a	c	h	a	h	h	c	c	a	c	h	h	h	h	c	a	c	h	a	a	h	h	c	h	h	c	a
chr7	AC7B0090	CL278.Contig1	85	G	A	S	h	h	h	a	a	a	h	a	c	a	h	c	h	c	a	h	a	c	h	a	h	h	c	c	a	c	h	h	h	h	c	a	c	h	a	a	h	h	c	h	h	c	a
chr7	AC7B0090	CL3558.Contig1	53	A	G	S	h	h	h	a	a	a	h	a	c	a	h	c	h	c	a	h	a	c	h	a	h	h	c	c	a	c	h	h	h	h	c	a	c	h	a	a	h	h	c	h	h	c	a
chr7	AC7B0090	CL513.Contig4	1464	T	C	S	h	h	h	a	a	a	h	a	c	a	h	c	h	c	a	h	a	c	h	a	h	h	c	c	a	c	h	h	h	h	c	a	c	h	a	a	h	h	c	h	h	c	a
chr7	AC7B0090	CL5149.Contig1	445	C	T	S	h	h	h	a	a	a	h	a	c	a	h	c	h	c	a	h	a	c	h	a	h	h	c	c	a	c	h	h	h	h	c	a	c	h	a	a	h	h	c	h	h	c	a
chr7	AC7B0090	CL6651.Contig1	1047	T	G	S	h	h	h	a	a	a	h	a	c	a	h	c	h	c	a	h	a	c	h	a	h	h	c	c	a	c	h	h	h	h	c	a	c	h	a	a	h	h	c	h	h	c	a
chr7	AC7B0090	CL7182.Contig1	507	G	C	S	h	h	h	a	a	a	h	a	c	a	h	c	h	c	a	h	a	c	h	a	h	h	c	c	a	c	h	h	h	h	c	a	c	h	a	a	h	h	c	h	h	c	a
chr7	AC7B0090	CL764.Contig1	194	C	T	S	h	h	h	a	a	a	h	a	c	a	h	c	h	c	a	h	a	c	h	a	h	h	c	c	a	c	h	h	h	h	c	a	c	h	a	a	h	h	c	h	h	c	a
chr7	AC7B0090	Unigene10179	228	T	C	S	h	h	h	a	a	a	h	a	c	a	h	c	h	c	a	h	a	c	h	a	h	h	c	c	a	c	h	h	h	h	c	a	c	h	a	a	h	h	c	h	h	c	a
chr7	AC7B0090	Unigene12091	121	A	G	S	h	h	h	a	a	a	h	a	c	a	h	c	h	c	a	h	a	c	h	a	h	h	c	c	a	c	h	h	h	h	c	a	c	h	a	a	h	h	c	h	h	c	a
chr7	AC7B0090	Unigene13322	100	A	G	S	h	h	h	a	a	a	h	a	c	a	h	c	h	c	a	h	a	c	h	a	h	h	c	c	a	c	h	h	h	h	c	a	c	h	a	a	h	h	c	h	h	c	a
chr7	AC7B0090	Unigene19737	222	C	G	S	h	h	h	a	a	a	h	a	c	a	h	c	h	c	a	h	a	c	h	a	h	h	c	c	a	c	h	h	h	h	c	a	c	h	a	a	h	h	c	h	h	c	a
chr7	AC7B0090	Unigene21620	15	T	C	S	h	h	h	a	a	a	h	a	c	a	h	c	h	c	a	h	a	c	h	a	h	h	c	c	a	c	h	h	h	h	c	a	c	h	a	a	h	h	c	h	h	c	a
chr7	AC7B0090	Unigene21849	4331	C	G	S	h	h	h	a	a	a	h	a	c	a	h	c	h	c	a	h	a	c	h	a	h	h	c	c	a	c	h	h	h	h	c	a	c	h	a	a	h	h	c	h	h	c	a
chr7	AC7B0090	Unigene22296	184	T	C	S	h	h	h	a	a	a	h	a	c	a	h	c	h	c	a	h	a	c	h	a	h	h	c	c	a	c	h	h	h	h	c	a	c	h	a	a	h	h	c	h	h	c	a
chr7	AC7B0090	Unigene24815	419	A	G	S	h	h	h	a	a	a	h	a	c	a	h	c	h	c	a	h	a	c	h	a	h	h	c	c	a	c	h	h	h	h	c	a	c	h	a	a	h	h	c	h	h	c	a
chr7	AC7B0090	Unigene25266	70	A	C	S	h	h	h	a	a	a	h	a	c	a	h	c	h	c	a	h	a	c	h	a	h	h	c	c	a	c	h	h	h	h	c	a	c	h	a	a	h	h	c	h	h	c	a
chr7	AC7B0090	Unigene25433	446	T	G	S	h	h	h	a	a	a	h	a	c	a	h	c	h	c	a	h	a	c	h	a	h	h	c	c	a	c	h	h	h	h	c	a	c	h	a	a	h	h	c	h	h	c	a
chr7	AC7B0090	Unigene26004	1024	T	C	S	h	h	h	a	a	a	h	a	c	a	h	c	h	c	a	h	a	c	h	a	h	h	c	c	a	c	h	h	h	h	c	a	c	h	a	a	h	h	c	h	h	c	a
chr7	AC7B0090	Unigene28036	169	T	C	S	h	h	h	a	a	a	h	a	c	a	h	c	h	c	a	h	a	c	h	a	h	h	c	c	a	c	h	h	h	h	c	a	c	h	a	a	h	h	c	h	h	c	a
chr7	AC7B0090	Unigene3715	337	A	C	S	h	h	h	a	a	a	h	a	c	a	h	c	h	c	a	h	a	c	h	a	h	h	c	c	a	c	h	h	h	h	c	a	c	h	a	a	h	h	c	h	h	c	a
chr7	AC7B0090	Unigene385	182	A	G	S	h	h	h	a	a	a	h	a	c	a	h	c	h	c	a	h	a	c	h	a	h	h	c	c	a	c	h	h	h	h	c	a	c	h	a	a	h	h	c	h	h	c	a
chr7	AC7B0090	Unigene5394	199	C	G	S	h	h	h	a	a	a	h	a	c	a	h	c	h	c	a	h	a	c	h	a	h	h	c	c	a	c	h	h	h	h	c	a	c	h	a	a	h	h	c	h	h	c	a
chr7	AC7B0090	Unigene592	322	A	G	S	h	h	h	a	a	a	h	a	c	a	h	c	h	c	a	h	a	c	h	a	h	h	c	c	a	c	h	h	h	h	c	a	c	h	a	a	h	h	c	h	h	c	a
chr7	AC7B0100	CL7005.Contig2	781	G	A	S	h	h	h	a	a	a	h	a	c	a	h	c	h	c	a	h	a	c	h	a	h	h	c	c	a	c	h	h	h	h	c	a	c	h	a	a	h	h	c	h	h	c	a
chr7	AC7B0100	CL897.Contig1	257	T	A	S	h	h	h	a	a	a	h	a	c	a	h	c	h	c	a	h	a	c	h	a	h	h	c	c	a	c	h	h	h	h	c	a	c	h	a	a	h	h	c	h	h	c	a
chr7	AC7B0100	Unigene10405	70	T	A	S	h	h	h	a	a	a	h	a	c	a	h	c	h	c	a	h	a	c	h	a	h	h	c	c	a	c	h	h	h	h	c	a	c	h	a	a	h	h	c	h	h	c	a
chr7	AC7B0100	Unigene28470	72	A	C	S	h	h	h	a	a	a	h	a	c	a	h	c	h	c	a	h	a	c	h	a	h	h	c	c	a	c	h	h	h	h	c	a	c	h	a	a	h	h	c	h	h	c	a
chr7	AC7B0100	Unigene28721	66	G	A	S	h	h	h	a	a	a	h	a	c	a	h	c	h	c	a	h	a	c	h	a	h	h	c	c	a	c	h	h	h	h	c	a	c	h	a	a	h	h	c	h	h	c	a
chr7	AC7B0110	Unigene13495	472	A	G	S	h	h	h	a	a	a	h	a	c	a	h	c	h	c	a	h	a	c	h	a	h	h	c	c	a	c	h	h	h	h	c	a	c	h	a	a	h	h	c	h	h	h	a
chr7	AC7B0110	Unigene23151	175	A	G	S	h	h	h	a	a	a	h	a	c	a	h	c	h	c	a	h	a	c	h	a	h	h	c	c	a	c	h	h	h	h	c	a	c	h	a	a	h	h	c	h	h	h	a
chr7	AC7B0110	Unigene28769	386	C	T	S	h	h	h	a	a	a	h	a	c	a	h	c	h	c	a	h	a	c	h	a	h	h	c	c	a	c	h	h	h	h	c	a	c	h	a	a	h	h	c	h	h	h	a
chr7	AC7B0120	Unigene27588	185	G	A	S	h	h	h	a	a	a	h	a	c	a	h	c	h	c	a	h	a	c	h	a	h	h	c	c	h	c	h	c	h	h	c	a	c	h	a	a	h	h	c	h	h	h	a
chr7	AC7B0130	CL2864.Contig1	67	G	A	S	h	h	h	a	a	a	h	a	c	a	h	c	h	c	a	h	a	c	h	a	h	h	c	c	h	c	h	c	h	h	c	a	c	h	a	a	h	h	c	h	h	h	a
chr7	AC7B0130	Unigene13266	525	G	A	S	h	h	h	a	a	a	h	a	c	a	h	c	h	c	a	h	a	c	h	a	h	h	c	c	h	c	h	c	h	h	c	a	c	h	a	a	h	h	c	h	h	h	a
chr7	AC7B0140	Unigene25680	127	C	T	S	h	h	h	h	a	a	h	a	c	a	h	c	h	c	a	h	a	c	h	a	h	h	c	c	h	c	h	c	h	h	c	a	c	h	a	a	h	h	c	h	h	h	a
chr7	AC7B0150	CL7056.Contig1	621	T	C	S	h	h	h	h	a	a	h	a	c	a	h	c	h	c	a	h	a	c	h	a	h	h	c	c	h	c	c	c	h	h	c	a	c	c	a	a	h	h	c	h	h	h	a
chr7	AC7B0150	Unigene27347	244	A	G	S	h	h	h	h	a	a	h	a	c	a	h	c	h	c	a	h	a	c	h	a	h	h	c	c	h	c	c	c	h	h	c	a	c	c	a	a	h	h	c	h	h	h	a
chr7	AC7B0150	Unigene27925	236	T	C	S	h	h	h	h	a	a	h	a	c	a	h	c	h	c	a	h	a	c	h	a	h	h	c	c	h	c	c	c	h	h	c	a	c	c	a	a	h	h	c	h	h	h	a
chr7	AC7B0150	Unigene28697	82	C	G	S	h	h	h	h	a	a	h	a	c	a	h	c	h	c	a	h	a	c	h	a	h	h	c	c	h	c	c	c	h	h	c	a	c	c	a	a	h	h	c	h	h	h	a
chr7	AC7B0150	Unigene31062	46	A	G	S	h	h	h	h	a	a	h	a	c	a	h	c	h	c	a	h	a	c	h	a	h	h	c	c	h	c	c	c	h	h	c	a	c	c	a	a	h	h	c	h	h	h	a
chr7	AC7B0150	Unigene31358	282	A	G	S	h	h	h	h	a	a	h	a	c	a	h	c	h	c	a	h	a	c	h	a	h	h	c	c	h	c	c	c	h	h	c	a	c	c	a	a	h	h	c	h	h	h	a
chr7	AC7B0150	Unigene6085	212	C	T	S	h	h	h	h	a	a	h	a	c	a	h	c	h	c	a	h	a	c	h	a	h	h	c	c	h	c	c	c	h	h	c	a	c	c	a	a	h	h	c	h	h	h	a
chr7	AC7B0160	Unigene12008	363	G	A	S	h	h	h	h	a	h	h	a	c	a	h	c	h	c	a	h	a	c	h	a	h	h	c	c	h	c	c	h	c	h	c	h	c	c	a	a	h	h	c	h	h	h	a
chr7	AC7B0170	CL1836.Contig1	213	A	G	S	h	h	h	h	a	h	a	a	c	a	h	c	h	c	a	h	a	c	h	a	h	h	c	c	h	c	c	h	c	h	c	h	c	c	a	a	h	h	c	h	h	h	a
chr7	AC7B0170	Unigene28912	50	A	G	S	h	h	h	h	a	h	a	a	c	a	h	c	h	c	a	h	a	c	h	a	h	h	c	c	h	c	c	h	c	h	c	h	c	c	a	a	h	h	c	h	h	h	a
chr7	AC7B0180	Unigene13818	120	A	C	S	h	h	h	h	a	h	a	h	c	a	h	c	h	c	a	h	a	c	h	a	h	h	c	c	h	c	c	h	c	h	c	h	c	c	a	a	h	h	c	h	h	h	a
chr7	AC7B0190	Unigene20998	101	G	A	S	h	h	h	h	a	h	a	h	c	a	h	c	h	c	a	h	a	c	h	a	h	h	c	c	h	c	c	h	c	h	c	h	c	c	a	a	h	h	c	h	h	h	a
chr7	AC7B0190	Unigene20999	30	A	G	S	h	h	h	h	a	h	a	h	c	a	h	c	h	c	a	h	a	c	h	a	h	h	c	c	h	c	c	h	c	h	c	h	c	c	a	a	h	h	c	h	h	h	a
chr7	AC7B0190	Unigene7494	207	T	C	S	h	h	h	h	a	h	a	h	c	a	h	c	h	c	a	h	a	c	h	a	h	h	c	c	h	c	c	h	c	h	c	h	c	c	a	a	h	h	c	h	h	h	a
chr7	AC7B0200	Unigene12886	635	A	G	S	h	h	h	h	a	h	a	h	c	a	h	c	h	c	a	h	a	c	h	a	h	h	c	c	h	c	c	h	c	h	c	h	c	c	a	a	h	h	c	h	h	h	a
chr7	AC7B0200	Unigene24350	82	C	T	S	h	h	h	h	a	h	a	h	c	a	h	c	h	c	a	h	a	c	h	a	h	h	c	c	h	c	c	h	c	h	c	h	c	c	a	a	h	h	c	h	h	h	a
chr7	AC7B0200	Unigene24352	164	A	T	S	h	h	h	h	a	h	a	h	c	a	h	c	h	c	a	h	a	c	h	a	h	h	c	c	h	c	c	h	c	h	c	h	c	c	a	a	h	h	c	h	h	h	a
chr7	AC7B0200	Unigene7115	122	C	A	S	h	h	h	h	a	h	a	h	c	a	h	c	h	c	a	h	a	c	h	a	h	h	c	h	h	c	c	h	c	h	c	h	c	c	a	a	h	h	c	h	h	h	a
chr7	AC7B0200	Unigene8049	142	T	C	S	h	h	h	h	a	h	a	h	c	a	h	c	h	c	a	h	a	c	h	a	h	h	c	h	h	c	c	h	c	h	c	h	c	c	a	a	h	h	c	h	h	h	a
chr7	AC7B0210	Unigene12574	768	A	G	S	h	h	h	h	h	h	a	h	c	a	h	c	h	c	a	h	a	c	h	a	h	h	c	h	h	c	c	h	c	h	c	h	c	c	a	a	h	h	h	h	h	h	a
chr7	AC7B0210	Unigene12575	274	T	C	S	h	h	h	h	h	h	a	h	c	a	h	c	h	c	a	h	a	c	h	a	h	h	c	h	h	c	c	h	c	h	c	h	c	c	a	a	h	h	h	h	h	h	a
chr7	AC7B0210	Unigene12920	68	G	A	S	h	h	h	h	h	h	a	h	c	a	h	c	h	c	a	h	a	c	h	a	h	h	c	h	h	c	c	h	c	h	c	h	c	c	a	a	h	h	h	h	h	h	a
chr7	AC7B0220	CL6778.Contig1	176	A	G	S	h	h	h	h	h	h	a	h	c	a	h	c	h	c	a	h	a	c	h	a	h	h	h	h	h	c	c	h	c	h	c	h	c	c	a	a	h	h	h	h	h	h	a
chr7	AC7B0220	Unigene12056	109	A	G	S	h	h	h	h	h	h	a	h	c	a	h	c	h	c	a	h	a	c	h	a	h	h	h	h	h	c	c	h	c	h	c	h	c	c	a	a	h	h	h	h	h	h	a
chr7	AC7B0220	Unigene13703	1068	A	G	S	h	h	h	h	h	h	a	h	c	a	h	c	h	c	a	h	a	c	h	a	h	h	h	h	h	c	c	h	c	h	c	h	c	c	a	a	h	h	h	h	h	h	a
chr7	AC7B0220	Unigene27846	29	C	T	S	h	h	h	h	h	h	a	h	c	a	h	c	h	c	a	h	a	c	h	a	h	h	h	h	h	c	c	h	c	h	c	h	c	c	a	a	h	h	h	h	h	h	a
chr7	AC7B0220	Unigene29556	154	T	A	S	h	h	h	h	h	h	a	h	c	a	h	c	h	c	a	h	a	c	h	a	h	h	h	h	h	c	c	h	c	h	c	h	c	c	a	a	h	h	h	h	h	h	a
chr7	AC7B0220	Unigene7483	42	A	G	S	h	h	h	h	h	h	a	h	c	a	h	c	h	c	a	h	a	c	h	a	h	h	h	h	h	c	c	h	c	h	c	h	c	c	a	a	h	h	h	h	h	h	a
chr7	AC7B0230	CL6565.Contig2	1231	G	A	S	h	h	h	h	h	h	a	h	c	a	h	c	h	c	a	h	a	c	h	a	a	h	h	h	h	c	c	h	c	h	c	h	c	c	a	a	h	h	h	h	h	h	a
chr7	AC7B0240	Unigene27415	79	T	A	S	h	h	h	h	h	h	a	h	c	a	h	c	h	c	a	h	a	c	h	a	h	h	h	h	h	c	c	h	h	h	c	h	c	c	a	a	h	h	h	h	h	h	a
chr7	AC7B0240	Unigene9911	1808	T	C	S	h	h	h	h	h	h	a	h	c	a	h	c	h	c	a	h	a	c	h	a	h	h	h	h	h	c	c	h	h	h	c	h	c	c	a	a	h	h	h	h	h	h	a
chr7	AC7B0250	CL1874.Contig2	57	C	T	S	h	h	h	h	h	h	a	h	c	a	h	c	h	c	a	h	a	c	h	a	h	h	h	h	h	c	c	h	h	h	h	h	c	c	a	a	h	h	h	h	h	h	a
chr7	AC7B0250	Unigene10020	210	C	G	S	h	h	h	h	h	h	a	h	c	a	h	c	h	c	a	h	a	c	h	a	h	h	h	h	h	c	c	h	h	h	h	h	c	c	a	a	h	h	h	h	h	h	a
chr7	AC7B0250	Unigene27628	718	A	G	S	h	h	h	h	h	h	a	h	c	a	h	c	h	c	a	h	a	c	h	a	h	h	h	h	h	c	c	h	h	h	h	h	c	c	a	a	h	h	h	h	h	h	a
chr7	AC7B0250	Unigene8784	385	G	A	S	h	h	h	h	h	h	a	h	c	a	h	c	h	c	a	h	a	c	h	a	h	h	h	h	h	c	c	h	h	h	h	h	c	c	a	a	h	h	h	h	h	h	a
chr7	AC7B0260	Unigene22714	884	T	C	S	h	h	h	h	h	h	a	h	c	a	h	c	h	h	a	h	a	c	h	a	h	h	c	h	h	c	c	h	h	h	h	h	c	c	a	a	h	h	h	h	h	h	a
chr7	AC7B0270	CL2113.Contig2	1957	T	A	S	h	h	h	h	h	h	a	h	c	a	h	c	h	h	a	c	a	c	h	a	h	h	c	h	h	c	c	h	h	h	h	h	c	c	a	a	h	h	h	h	h	h	a
chr7	AC7B0280	Unigene8142	301	T	C	S	h	h	h	h	h	h	a	h	c	a	h	c	h	h	a	c	a	h	h	h	h	h	c	h	h	c	c	h	h	h	h	h	c	c	a	a	h	h	h	h	h	h	a
chr7	AC7B0290	Unigene19618	27	T	C	S	h	h	h	a	h	h	a	h	c	a	h	c	h	h	a	c	a	h	h	h	h	h	c	h	h	c	c	h	h	h	h	h	c	c	a	a	h	h	h	h	h	h	a
chr7	AC7B0290	Unigene5936	80	T	G	S	h	h	h	a	h	h	a	h	c	a	h	c	h	h	a	c	a	h	h	h	h	h	c	h	h	c	c	h	h	h	h	h	c	c	a	a	h	h	h	h	h	h	a
chr7	AC7B0300	Unigene10225	67	C	T	S	h	h	h	a	h	h	a	h	c	a	h	c	h	h	a	c	a	h	h	c	h	h	c	h	h	c	c	h	h	h	h	h	c	c	a	a	h	h	h	h	h	h	a
chr7	AC7B0300	Unigene10228	47	A	G	S	h	h	h	a	h	h	a	h	c	a	h	c	h	h	a	c	a	h	h	c	h	h	c	h	h	c	c	h	h	h	h	h	c	c	a	a	h	h	h	h	h	h	a
chr7	AC7B0300	Unigene11841	378	C	T	S	h	h	h	a	h	h	a	h	c	a	h	c	h	h	a	c	a	h	h	c	h	h	c	h	h	c	c	h	h	h	h	h	c	c	a	a	h	h	h	h	h	h	a
chr7	AC7B0300	Unigene22061	263	T	C	S	h	h	h	a	h	h	a	h	c	a	h	c	h	h	a	c	a	h	h	c	h	h	c	h	h	c	c	h	h	h	h	h	c	c	a	a	h	h	h	h	h	h	a
chr7	AC7B0300	Unigene22063	854	T	A	S	h	h	h	a	h	h	a	h	c	a	h	c	h	h	a	c	a	h	h	c	h	h	c	h	h	c	c	h	h	h	h	h	c	c	a	a	h	h	h	h	h	h	a
chr7	AC7B0300	Unigene30962	88	G	A	S	h	h	h	a	h	h	a	h	c	a	h	c	h	h	a	c	a	h	h	c	h	h	c	h	h	c	c	h	h	h	h	h	c	c	a	a	h	h	h	h	h	h	a
chr7	AC7B0310	CL3998.Contig1	158	C	A	S	a	h	h	a	h	h	a	h	c	a	h	c	h	h	a	c	a	h	h	c	a	h	c	h	h	c	c	h	h	h	h	h	c	c	a	a	h	h	h	h	c	h	a
chr7	AC7B0310	Unigene30793	45	T	C	S	a	h	h	a	h	h	a	h	c	a	h	c	h	h	a	c	a	h	h	c	a	h	c	h	h	c	c	h	h	h	h	h	c	c	a	a	h	h	h	h	c	h	a
chr7	AC7B0320	Unigene28111	24	A	G	S	a	h	h	a	h	h	a	h	c	a	h	c	h	h	a	c	a	h	h	c	a	h	c	h	h	c	c	h	h	h	h	h	c	h	a	a	h	h	h	h	c	h	h
chr7	AC7B0320	CL4682.Contig1	1579	A	G	S	a	h	h	a	h	h	a	h	c	a	h	c	h	h	a	c	a	h	h	c	a	h	c	h	h	c	c	h	h	h	h	h	c	h	a	a	h	h	h	h	c	h	h
chr7	AC7B0320	Unigene9784	546	A	G	S	a	h	h	a	h	h	a	h	c	a	h	c	h	h	a	c	a	h	h	c	a	h	c	h	h	c	c	h	h	h	h	h	c	h	a	a	h	h	h	h	c	h	h
chr7	AC7B0330	CL3481.Contig1	414	G	T	S	a	h	h	a	h	h	a	h	c	a	h	c	h	h	a	c	a	h	h	c	a	h	c	h	h	c	c	h	h	h	h	h	c	h	a	a	h	h	h	h	c	h	h
chr7	AC7B0340	CL1190.Contig2	1579	T	C	S	a	h	h	a	h	h	a	h	c	a	h	c	h	h	a	c	a	h	h	c	a	h	c	h	h	c	c	h	h	h	h	h	c	h	a	a	h	h	h	h	c	h	h
chr7	AC7B0340	CL5277.Contig1	546	A	C	S	a	h	h	a	h	h	a	h	c	a	h	c	h	h	a	c	a	h	h	c	a	h	c	h	h	c	c	h	h	h	h	h	c	h	a	a	h	h	h	h	c	h	h
chr7	AC7B0350	Unigene27352	1652	T	G	S	a	h	h	a	h	h	a	h	c	a	h	c	h	h	a	c	a	h	h	c	a	h	c	a	h	c	c	c	h	h	h	h	c	h	a	a	h	h	h	h	c	h	h
chr7	AC7B0360	CL2688.Contig1	422	A	G	S	a	h	h	a	h	h	a	h	c	a	h	c	h	h	a	c	a	h	h	c	a	h	c	a	h	c	c	c	h	h	h	h	c	h	a	h	h	h	h	h	c	h	h
chr7	AC7B0370	Unigene20558	87	G	C	S	h	h	h	a	h	h	a	h	c	a	h	c	h	h	a	c	a	h	h	c	a	h	c	a	h	c	c	c	h	h	h	c	c	h	a	h	h	h	h	h	c	h	h
chr7	AC7B0380	Unigene13834	479	G	T	S	h	h	a	a	h	h	a	c	c	a	h	c	h	h	a	c	a	h	h	c	a	h	c	a	h	c	c	c	h	h	h	c	c	h	a	h	h	h	h	h	c	h	h
chr7	AC7B0380	Unigene28608	15	C	T	S	h	h	a	a	h	h	a	c	c	a	h	c	h	h	a	c	a	h	h	c	a	h	c	a	h	c	c	c	h	h	h	c	c	h	a	h	h	h	h	h	c	h	h
chr7	AC7B0390	Unigene23849	317	G	A	S	h	h	a	a	h	h	a	c	c	a	h	c	h	h	a	c	a	h	h	c	a	h	c	a	h	c	c	c	h	h	h	c	c	h	a	h	h	h	h	h	c	h	h
chr7	AC7B0390	Unigene23850	204	C	T	S	h	h	a	a	h	h	a	c	c	a	h	c	h	h	a	c	a	h	h	c	a	h	c	a	h	c	c	c	h	h	h	c	c	h	a	h	h	h	h	h	c	h	h
chr7	AC7B0390	Unigene29056	87	C	A	S	h	h	a	a	h	h	a	c	c	a	h	c	h	h	a	c	a	h	h	c	a	h	c	a	h	c	c	c	h	h	h	c	c	h	a	h	h	h	h	h	c	h	h
chr7	AC7B0390	Unigene30266	308	C	T	S	h	h	a	a	h	h	a	c	c	a	h	c	h	h	a	c	a	h	h	c	a	h	c	a	h	c	c	c	h	h	h	c	c	h	a	h	h	h	h	h	c	h	h
chr7	AC7B0390	Unigene40615	29	G	A	S	h	h	a	a	h	h	a	c	c	a	h	c	h	h	a	c	a	h	h	c	a	h	c	a	h	c	c	c	h	h	h	c	c	h	a	h	h	h	h	h	c	h	h
chr7	AC7B0400	Unigene27522	919	G	A	S	h	h	a	a	h	h	a	c	c	a	h	c	h	h	a	c	a	h	h	c	a	h	c	a	h	c	c	c	h	h	h	c	c	h	a	h	h	h	h	h	c	h	h
chr7	AC7B0410	Unigene13935	265	A	G	S	h	h	a	a	h	h	a	c	c	a	h	c	h	h	a	c	a	h	h	c	a	h	c	a	h	c	c	c	h	h	h	c	c	h	a	h	h	h	h	h	c	h	h
chr7	AC7B0410	Unigene13936	155	C	T	S	h	h	a	a	h	h	a	c	c	a	h	c	h	h	a	c	a	h	h	c	a	h	c	a	h	c	c	c	h	h	h	c	c	h	a	h	h	h	h	h	c	h	h
chr7	AC7B0420	CL3814.Contig1	620	T	C	S	h	h	a	a	h	h	a	c	c	a	h	c	h	h	a	c	a	h	h	c	a	h	c	a	h	c	c	c	h	h	h	c	c	h	h	h	h	h	h	h	c	h	h
chr7	AC7B0430	CL2379.Contig1	601	A	T	S	h	h	a	a	h	c	a	c	c	a	h	c	h	h	a	c	a	h	h	c	a	h	c	a	h	c	c	c	h	h	h	c	c	h	h	h	h	h	h	h	c	h	h
chr7	AC7B0430	CL1852.Contig1	230	A	T	S	h	h	a	a	h	c	a	c	c	a	h	c	h	h	a	c	a	h	h	c	a	h	c	a	h	c	c	c	h	h	h	c	c	h	h	h	h	h	h	h	c	h	h
chr7	AC7B0430	CL5786.Contig2	284	A	T	S	h	h	a	a	h	c	a	c	c	a	h	c	h	h	a	c	a	h	h	c	a	h	c	a	h	c	c	c	h	h	h	c	c	h	h	h	h	h	h	h	c	h	h
chr7	AC7B0440	Unigene11973	837	A	G	S	h	h	a	a	h	c	a	c	c	a	h	c	h	h	a	c	a	h	h	c	a	h	c	a	h	c	c	h	h	h	h	c	c	h	h	h	h	h	h	h	c	h	h
chr7	AC7B0440	Unigene27772	762	G	A	S	h	h	a	a	h	c	a	c	c	a	h	c	h	h	a	c	a	h	h	c	a	h	c	a	h	c	c	h	h	h	h	c	c	h	h	h	h	h	h	h	c	h	h
chr7	AC7B0440	Unigene28570	968	A	G	S	h	h	a	a	h	c	a	c	c	a	h	c	h	h	a	c	a	h	h	c	a	h	c	a	h	c	c	h	h	h	h	c	c	h	h	h	h	h	h	h	c	h	h
chr7	AC7B0450	Unigene27468	633	G	A	S	h	h	h	a	h	c	a	c	c	a	h	c	h	h	h	c	a	h	h	c	a	h	c	h	h	c	c	c	h	h	h	c	c	h	h	h	h	h	h	h	c	h	h
chr7	AC7B0460	Unigene24722	438	T	G	S	h	h	h	a	h	c	a	c	h	a	h	c	h	h	h	c	a	h	h	c	a	h	c	h	h	c	c	c	h	h	h	c	c	h	h	h	h	h	h	h	c	h	h
chr7	AC7B0460	CL4921.Contig2	354	G	A	S	h	h	h	a	h	c	a	c	h	a	h	c	h	h	h	c	a	h	h	c	a	h	c	h	h	c	c	c	h	h	h	c	c	h	h	h	h	h	h	h	c	h	h
chr7	AC7B0460	CL6723.Contig1	271	C	T	S	h	h	h	a	h	c	a	c	h	a	h	c	h	h	h	c	a	h	h	c	a	h	c	h	h	c	c	c	h	h	h	c	c	h	h	h	h	h	h	h	c	h	h
chr7	AC7B0460	Unigene11564	473	T	A	S	h	h	h	a	h	c	a	c	h	a	h	c	h	h	h	c	a	h	h	c	a	h	c	h	h	c	c	c	h	h	h	c	c	h	h	h	h	h	h	h	c	h	h
chr7	AC7B0460	Unigene21301	192	G	A	S	h	h	h	a	h	c	a	c	h	a	h	c	h	h	h	c	a	h	h	c	a	h	c	h	h	c	c	c	h	h	h	c	c	h	h	h	h	h	h	h	c	h	h
chr7	AC7B0470	Unigene25361	726	C	T	S	h	h	h	a	h	c	a	c	h	a	h	c	h	h	h	c	a	h	h	c	a	h	c	h	h	c	c	c	h	h	h	c	c	h	h	h	h	h	h	h	c	h	h
chr7	AC7B0480	Unigene8371	818	G	A	S	h	h	h	a	h	c	a	c	h	a	c	c	h	h	h	c	a	h	h	c	a	h	c	h	h	c	c	c	h	h	h	c	c	h	h	h	c	h	h	h	h	h	h
chr7	AC7B0480	Unigene8372	126	A	C	S	h	h	h	a	h	c	a	c	h	a	c	c	h	h	h	c	a	h	h	c	a	h	c	h	h	c	c	c	h	h	h	c	c	h	h	h	c	h	h	h	h	h	h
chr7	AC7B0500	CL3583.Contig2	315	G	A	S	h	h	h	a	h	c	a	c	h	a	c	c	h	h	h	c	a	h	h	c	a	h	c	h	c	c	c	c	h	h	h	c	c	h	h	h	c	h	h	h	h	h	h
chr7	AC7B0500	CL4355.Contig1	69	C	T	S	h	h	h	a	h	c	a	c	h	a	c	c	h	h	h	c	a	h	h	c	a	h	c	h	c	c	c	c	h	h	h	c	c	h	h	h	c	h	h	h	h	h	h
chr7	AC7B0500	Unigene13586	347	G	A	S	h	h	h	a	h	c	a	c	h	a	c	c	h	h	h	c	a	h	h	c	a	h	c	h	c	c	c	c	h	h	h	c	c	h	h	h	c	h	h	h	h	h	h
chr7	AC7B0500	Unigene28091	413	C	T	S	h	h	h	a	h	c	a	c	h	a	c	c	h	h	h	c	a	h	h	c	a	h	c	h	c	c	c	c	h	h	h	c	c	h	h	h	c	h	h	h	h	h	h
chr7	AC7B0500	Unigene6454	230	G	A	S	h	h	h	a	h	c	a	c	h	a	c	c	h	h	h	c	a	h	h	c	a	h	c	h	c	c	c	c	h	h	h	c	c	h	h	h	c	h	h	h	h	h	h
chr7	AC7B0510	Unigene10805	600	T	C	S	h	h	h	a	h	c	a	h	h	a	c	h	h	h	h	c	a	h	h	c	a	h	c	h	c	c	c	c	h	h	h	c	c	h	h	h	c	h	h	h	h	h	h
chr7	AC7B0510	Unigene10806	769	T	C	S	h	h	h	a	h	c	a	h	h	a	c	h	h	h	h	c	a	h	h	c	a	h	c	h	c	c	c	c	h	h	h	c	c	h	h	h	c	h	h	h	h	h	h
chr7	AC7B0510	Unigene12254	911	T	G	S	h	h	h	a	h	c	a	h	h	a	c	h	h	h	h	c	a	h	h	c	a	h	c	h	c	c	c	c	h	h	h	c	c	h	h	h	c	h	h	h	h	h	h
chr7	AC7B0510	Unigene9098	451	G	C	S	h	h	h	a	h	c	a	h	h	a	c	h	h	h	h	c	a	h	h	c	a	h	c	h	c	c	c	c	h	h	h	c	c	h	h	h	c	h	h	h	h	h	h
chr7	AC7B0520	CL1815.Contig2	1003	A	G	S	h	h	h	a	h	c	a	h	h	a	c	h	h	h	h	c	a	h	a	c	a	h	c	h	c	c	c	c	h	h	h	c	c	h	h	h	c	h	h	h	h	h	h
chr7	AC7B0520	Unigene14017	347	T	C	S	h	h	h	a	h	c	a	h	h	a	c	h	h	h	h	c	a	h	a	c	a	h	c	h	c	c	c	c	h	h	h	c	c	h	h	h	c	h	h	h	h	h	h
chr7	AC7B0530	Unigene929	187	A	G	S	h	h	h	a	h	c	a	h	h	a	c	h	h	h	h	c	a	h	a	c	a	h	c	h	c	c	c	c	h	h	h	c	c	h	h	h	c	h	h	h	h	h	h
chr7	AC7B0540	Unigene28333	585	G	A	S	h	h	h	a	h	c	a	h	h	a	c	h	h	h	h	c	a	h	a	c	a	h	c	h	c	c	c	c	h	h	h	c	c	h	h	h	c	h	h	h	h	h	h
chr7	AC7B0540	Unigene3331	111	A	G	S	h	h	h	a	h	c	a	h	h	a	c	h	h	h	h	c	a	h	a	c	a	h	c	h	c	c	c	c	h	h	h	c	c	h	h	h	c	h	h	h	h	h	h
chr7	AC7B0550	CL6720.Contig2	674	A	G	S	h	h	h	a	h	c	a	h	h	a	c	h	h	h	h	c	a	h	a	c	a	h	c	h	c	c	c	c	h	h	h	c	c	h	h	h	c	h	h	h	h	h	h
chr7	AC7B0550	Unigene9338	353	G	A	S	h	h	h	a	h	c	a	h	h	a	c	h	h	h	h	c	a	h	a	c	a	h	c	h	c	c	c	c	h	h	h	c	c	h	h	h	c	h	h	h	h	h	h
chr7	AC7B0560	CL3734.Contig2	685	G	A	S	h	h	h	a	c	c	a	h	h	a	c	h	h	h	h	c	a	h	a	c	a	h	c	h	c	c	c	c	h	h	h	h	c	h	h	h	c	h	h	h	h	h	h
chr7	AC7B0560	CL3963.Contig1	493	T	A	S	h	h	h	a	c	c	a	h	h	a	c	h	h	h	h	c	a	h	a	c	a	h	c	h	c	c	c	c	h	h	h	h	c	h	h	h	c	h	h	h	h	h	h
chr7	AC7B0560	Unigene27513	148	C	T	S	h	h	h	a	c	c	a	h	h	a	c	h	h	h	h	c	a	h	a	c	a	h	c	h	c	c	c	c	h	h	h	h	c	h	h	h	c	h	h	h	h	h	h
chr7	AC7B0560	Unigene28047	225	C	T	S	h	h	h	a	c	c	a	h	h	a	c	h	h	h	h	c	a	h	a	c	a	h	c	h	c	c	c	c	h	h	h	h	c	h	h	h	c	h	h	h	h	h	h
chr7	AC7B0560	Unigene37032	71	A	G	S	h	h	h	a	c	c	a	h	h	a	c	h	h	h	h	c	a	h	a	c	a	h	c	h	c	c	c	c	h	h	h	h	c	h	h	h	c	h	h	h	h	h	h
chr7	AC7B0560	Unigene9076	383	T	C	S	h	h	h	a	c	c	a	h	h	a	c	h	h	h	h	c	a	h	a	c	a	h	c	h	c	c	c	c	h	h	h	h	c	h	h	h	c	h	h	h	h	h	h
chr7	AC7B0570	CL2973.Contig3	712	C	T	S	h	h	h	a	c	c	a	h	h	a	h	h	h	h	h	c	a	h	a	c	a	h	c	h	c	c	c	c	h	h	h	h	c	h	h	h	c	h	h	h	h	h	h
chr7	AC7B0570	Unigene16516	129	A	C	S	h	h	h	a	c	c	a	h	h	a	h	h	h	h	h	c	a	h	a	c	a	h	c	h	c	c	c	c	h	h	h	h	c	h	h	h	c	h	h	h	h	h	h
chr7	AC7B0580	CL3968.Contig1	289	A	T	S	h	h	h	a	c	c	a	h	h	a	h	h	h	h	h	c	a	h	a	c	a	h	c	h	c	c	c	c	h	h	a	h	c	h	c	h	c	h	h	h	h	h	h
chr7	AC7B0580	CL762.Contig2	143	T	C	S	h	h	h	a	c	c	a	h	h	a	h	h	h	h	h	c	a	h	a	c	a	h	c	h	c	c	c	c	h	h	a	h	c	h	c	h	c	h	h	h	h	h	h
chr7	AC7B0580	Unigene3694	356	T	A	S	h	h	h	a	c	c	a	h	h	a	h	h	h	h	h	c	a	h	a	c	a	h	c	h	c	c	c	c	h	h	a	h	c	h	c	h	c	h	h	h	h	h	h
chr7	AC7B0590	CL5389.Contig2	923	T	C	S	h	h	h	a	c	c	a	h	h	a	h	h	h	h	h	h	a	h	a	c	a	h	c	h	c	c	c	c	h	h	a	h	c	h	c	h	c	h	h	h	h	h	h
chr7	AC7B0600	Unigene14096	284	A	T	S	h	h	h	a	c	c	a	h	h	a	h	h	h	h	h	h	a	h	a	c	a	h	c	h	c	c	h	c	h	h	a	h	c	h	c	h	c	h	h	h	h	h	h
chr7	AC7B0600	Unigene21816	94	G	A	S	h	h	h	a	c	c	a	h	h	a	h	h	h	h	h	h	a	h	a	c	a	h	c	h	c	c	h	c	h	h	a	h	c	h	c	h	c	h	h	h	h	h	h
chr7	AC7B0600	Unigene21818	76	T	C	S	h	h	h	a	c	c	a	h	h	a	h	h	h	h	h	h	a	h	a	c	a	h	c	h	c	c	h	c	h	h	a	h	c	h	c	h	c	h	h	h	h	h	h
chr7	AC7B0600	Unigene25044	220	T	C	S	h	h	h	a	c	c	a	h	h	a	h	h	h	h	h	h	a	h	a	c	a	h	c	h	c	c	h	c	h	h	a	h	c	h	c	h	c	h	h	h	h	h	h
chr7	AC7B0600	Unigene27221	256	A	C	S	h	h	h	a	c	c	a	h	h	a	h	h	h	h	h	h	a	h	a	c	a	h	c	h	c	c	h	c	h	h	a	h	c	h	c	h	c	h	h	h	h	h	h
chr7	AC7B0600	Unigene28157	390	G	A	S	h	h	h	a	c	c	a	h	h	a	h	h	h	h	h	h	a	h	a	c	a	h	c	h	c	c	h	c	h	h	a	h	c	h	c	h	c	h	h	h	h	h	h
chr7	AC7B0600	Unigene9631	179	C	T	S	h	h	h	a	c	c	a	h	h	a	h	h	h	h	h	h	a	h	a	c	a	h	c	h	c	c	h	c	h	h	a	h	c	h	c	h	c	h	h	h	h	h	h
chr7	AC7B0610	Unigene4765	57	A	G	S	h	h	h	a	c	c	a	h	h	a	h	h	h	h	h	h	a	h	a	c	a	h	c	h	c	c	h	c	h	h	a	h	c	h	c	h	c	h	h	h	h	h	h
chr8	AC8B0010	CL6718.Contig1	1720	C	T	S	h	h	h	h	h	c	c	h	c	h	h	c	a	a	a	h	a	h	h	c	c	h	h	c	a	c	h	c	h	c	a	h	a	c	c	h	h	h	h	c	a	h	a
chr8	AC8B0020	Unigene28118	1051	T	A	S	h	a	c	h	h	c	c	h	c	h	h	c	a	a	a	h	a	c	h	c	c	c	h	c	a	c	h	c	h	h	a	h	a	h	c	h	h	h	h	c	a	h	a
chr8	AC8B0030	CL3190.Contig4	459	T	C	S	h	a	c	h	h	c	c	h	c	h	h	c	a	a	a	h	a	c	h	c	c	c	h	c	a	c	h	c	h	h	a	h	a	a	c	h	h	h	h	c	a	h	a
chr8	AC8B0030	Unigene12177	279	G	A	S	h	a	c	h	h	c	c	h	c	h	h	c	a	a	a	h	a	c	h	c	c	c	h	c	a	c	h	c	h	h	a	h	a	a	c	h	h	h	h	c	a	h	a
chr8	AC8B0040	CL3300.Contig1	385	A	T	S	h	a	c	h	h	c	h	a	c	a	h	c	a	a	h	h	a	c	h	h	h	c	h	c	a	c	a	c	h	h	a	h	a	a	c	c	h	h	h	c	a	h	a
chr8	AC8B0040	Unigene27350	72	T	G	S	h	a	c	h	h	c	h	a	c	a	h	c	a	a	h	h	a	c	h	h	h	c	h	c	a	c	a	c	h	h	a	h	a	a	c	c	h	h	h	c	a	h	a
chr8	AC8B0040	Unigene38652	48	T	G	S	h	a	c	h	h	c	h	a	c	a	h	c	a	a	h	h	a	c	h	h	h	c	h	c	a	c	a	c	h	h	a	h	a	a	c	c	h	h	h	c	a	h	a
chr8	AC8B0050	Unigene24525	90	T	C	S	h	a	c	h	h	c	h	a	c	a	h	c	a	a	h	h	a	c	h	h	h	c	h	c	a	c	a	c	h	h	a	h	h	a	c	c	h	h	h	c	a	h	a
chr8	AC8B0050	Unigene27396	299	T	C	S	h	a	c	h	h	c	h	a	c	a	h	c	a	a	h	h	a	c	h	h	h	c	h	c	a	c	a	c	h	h	a	h	h	a	c	c	h	h	h	c	a	h	a
chr8	AC8B0060	Unigene28806	427	C	T	S	h	a	c	h	h	c	h	a	h	a	h	c	a	a	h	h	a	c	h	h	h	c	h	c	a	c	a	c	h	h	a	h	h	a	c	c	h	h	a	c	a	h	a
chr8	AC8B0070	Unigene8817	1936	C	T	S	h	a	c	h	h	c	h	a	a	a	h	c	a	a	h	h	a	c	h	h	h	c	h	c	a	c	a	c	h	h	a	h	h	a	c	c	h	h	a	c	a	h	a
chr8	AC8B0080	CL5149.Contig2	361	G	A	S	h	a	c	h	h	c	h	a	a	a	h	c	a	a	h	h	a	c	h	h	h	c	h	c	a	c	a	c	h	h	a	h	h	a	c	c	h	h	a	c	a	a	h
chr8	AC8B0080	Unigene28139	257	A	G	S	h	a	c	h	h	c	h	a	a	a	h	c	a	a	h	h	a	c	h	h	h	c	h	c	a	c	a	c	h	h	a	h	h	a	c	c	h	h	a	c	a	a	h
chr8	AC8B0080	Unigene8297	1885	G	A	S	h	a	c	h	h	c	h	a	a	a	h	c	a	a	h	h	a	c	h	h	h	c	h	c	a	c	a	c	h	h	a	h	h	a	c	c	h	h	a	c	a	a	h
chr8	AC8B0080	Unigene8675	108	A	G	S	h	a	c	h	h	c	h	a	a	a	h	c	a	a	h	h	a	c	h	h	h	c	h	c	a	c	a	c	h	h	a	h	h	a	c	c	h	h	a	c	a	a	h
chr8	AC8B0090	Unigene3512	377	A	G	S	h	a	c	h	h	c	h	a	a	a	h	c	a	a	h	h	a	c	h	h	h	c	h	c	a	c	a	c	h	h	a	h	h	a	c	c	h	h	a	c	a	a	h
chr8	AC8B0100	Unigene28908	487	T	C	S	h	a	c	h	h	c	h	a	a	a	h	c	a	a	h	h	a	c	h	h	h	c	h	c	a	c	a	c	h	h	a	h	h	a	c	c	h	h	a	c	h	a	h
chr8	AC8B0100	Unigene4663	272	A	G	S	h	a	c	h	h	c	h	a	a	a	h	c	a	a	h	h	a	c	h	h	h	c	h	c	a	c	a	c	h	h	a	h	h	a	c	c	h	h	a	c	h	a	h
chr8	AC8B0100	Unigene8182	65	T	C	S	h	a	c	h	h	c	h	a	a	a	h	c	a	a	h	h	a	c	h	h	h	c	h	c	a	c	a	c	h	h	a	h	h	a	c	c	h	h	a	c	h	a	h
chr8	AC8B0110	Unigene29428	908	G	T	S	h	a	c	h	h	c	h	a	a	a	h	c	a	a	h	h	a	c	h	h	h	h	h	c	a	c	a	c	h	h	a	h	h	a	h	c	h	h	a	c	h	a	h
chr8	AC8B0120	CL1017.Contig2	2326	T	G	S	h	h	c	c	h	c	h	a	a	a	h	h	a	a	h	h	a	c	h	h	h	h	h	c	a	h	h	h	h	h	h	h	h	a	h	c	h	h	a	c	h	a	h
chr8	AC8B0120	Unigene20045	439	T	C	S	h	h	c	c	h	c	h	a	a	a	h	h	a	a	h	h	a	c	h	h	h	h	h	c	a	h	h	h	h	h	h	h	h	a	h	c	h	h	a	c	h	a	h
chr8	AC8B0130	CL415.Contig1	195	C	T	S	h	h	c	c	h	c	h	a	a	a	h	h	a	a	h	h	a	c	h	h	h	h	h	c	a	h	h	h	h	h	h	h	h	a	h	c	h	h	a	c	h	a	h
chr8	AC8B0130	Unigene13297	873	C	T	S	h	h	c	c	h	c	h	a	a	a	h	h	a	a	h	h	a	c	h	h	h	h	h	c	a	h	h	h	h	h	h	h	h	a	h	c	h	h	a	c	h	a	h
chr8	AC8B0140	CL2.Contig3	167	T	C	S	h	h	c	c	h	c	h	a	a	a	a	h	a	a	h	h	a	c	h	h	h	h	h	c	a	h	h	h	h	a	h	h	h	a	h	c	h	a	a	c	h	a	h
chr8	AC8B0140	Unigene22490	1788	G	A	S	h	h	c	c	h	c	h	a	a	a	a	h	a	a	h	h	a	c	h	h	h	h	h	c	a	h	h	h	h	a	h	h	h	a	h	c	h	a	a	c	h	a	h
chr8	AC8B0140	Unigene27500	216	C	T	S	h	h	c	c	h	c	h	a	a	a	a	h	a	a	h	h	a	c	h	h	h	h	h	c	a	h	h	h	h	a	h	h	h	a	h	c	h	a	a	c	h	a	h
chr8	AC8B0150	Unigene21289	107	A	T	S	h	h	c	c	h	c	h	a	a	a	a	h	a	a	h	h	a	c	h	h	h	h	a	c	a	h	a	h	h	a	h	h	h	a	h	c	h	a	a	c	h	a	h
chr8	AC8B0150	Unigene27278	118	T	C	S	h	h	c	c	h	c	h	a	a	a	a	h	a	a	h	h	a	c	h	h	h	h	a	c	a	h	a	h	h	a	h	h	h	a	h	c	h	a	a	c	h	a	h
chr8	AC8B0160	Unigene24216	644	T	C	S	h	h	c	c	h	c	h	a	a	a	a	h	a	a	h	h	h	c	h	h	h	h	a	c	a	h	a	h	h	a	h	a	h	a	h	c	h	a	a	c	h	a	h
chr8	AC8B0170	Unigene896	317	A	T	S	h	h	c	c	h	c	h	a	a	a	a	h	a	a	h	h	h	c	h	h	h	h	a	c	a	h	a	h	h	a	h	a	h	a	h	c	h	a	a	c	h	a	h
chr8	AC8B0180	Unigene10739	1460	C	T	S	h	h	c	c	h	c	h	a	a	a	a	h	a	a	h	h	h	c	h	h	h	h	a	c	a	h	a	h	h	a	h	a	h	a	h	c	h	a	a	c	h	a	h
chr8	AC8B0180	Unigene8762	64	G	A	S	h	h	c	c	h	c	h	a	a	a	a	h	a	a	h	h	h	c	h	h	h	h	a	c	a	h	a	h	h	a	h	a	h	a	h	c	h	a	a	c	h	a	h
chr8	AC8B0190	CL2208.Contig1	364	T	C	S	h	h	c	c	h	c	h	a	a	a	a	h	a	a	h	h	h	c	h	h	h	h	a	c	a	h	a	h	h	a	h	a	h	a	h	c	h	a	a	c	h	a	h
chr8	AC8B0190	Unigene28341	365	T	C	S	h	h	c	c	h	c	h	a	a	a	a	h	a	a	h	h	h	c	h	h	h	h	a	c	a	h	a	h	h	a	h	a	h	a	h	c	h	a	a	c	h	a	h
chr8	AC8B0190	Unigene8902	215	C	T	S	h	h	c	c	h	c	h	a	a	a	a	h	a	a	h	h	h	c	h	h	h	h	a	c	a	h	a	h	h	a	h	a	h	a	h	c	h	a	a	c	h	a	h
chr8	AC8B0200	Unigene31622	359	T	A	S	h	h	c	c	h	c	h	a	a	a	a	h	h	a	h	h	h	c	h	h	h	h	a	c	a	h	a	h	h	a	h	a	h	a	h	c	c	a	a	c	h	a	h
chr8	AC8B0200	CL6033.Contig1	601	C	T	S	h	h	c	c	h	c	h	a	a	a	a	h	h	a	h	h	h	c	h	h	h	h	a	c	a	h	a	h	h	a	h	a	h	a	h	c	c	a	a	c	h	a	h
chr8	AC8B0200	Unigene17937	269	C	T	S	h	h	c	c	h	c	h	a	a	a	a	h	h	a	h	h	h	c	h	h	h	h	a	c	a	h	a	h	h	a	h	a	h	a	h	c	c	a	a	c	h	a	h
chr8	AC8B0200	Unigene17938	803	A	T	S	h	h	c	c	h	c	h	a	a	a	a	h	h	a	h	h	h	c	h	h	h	h	a	c	a	h	a	h	h	a	h	a	h	a	h	c	c	a	a	c	h	a	h
chr8	AC8B0200	Unigene30973	214	C	T	S	h	h	c	c	h	c	h	a	a	a	a	h	h	a	h	h	h	c	h	h	h	h	a	c	a	h	a	h	h	a	h	a	h	a	h	c	c	a	a	c	h	a	h
chr8	AC8B0200	Unigene6997	160	T	C	S	h	h	c	c	h	c	h	a	a	a	a	h	h	a	h	h	h	c	h	h	h	h	a	c	a	h	a	h	h	a	h	a	h	a	h	c	c	a	a	c	h	a	h
chr8	AC8B0210	Unigene3986	62	T	A	S	h	h	c	c	h	c	h	a	a	a	a	h	h	a	h	h	h	c	h	h	h	h	a	c	a	h	a	h	h	a	h	a	h	a	h	c	c	a	a	c	h	a	h
chr8	AC8B0210	Unigene5084	892	A	G	S	h	h	c	c	h	c	h	a	a	a	a	h	h	a	h	h	h	c	h	h	h	h	a	c	a	h	a	h	h	a	h	a	h	a	h	c	c	a	a	c	h	a	h
chr8	AC8B0220	Unigene24299	45	T	G	S	h	h	c	c	h	c	h	a	a	a	a	h	h	a	h	h	h	c	h	h	h	h	a	c	a	h	a	h	h	a	h	a	h	a	h	c	c	a	a	c	h	h	h
chr8	AC8B0220	Unigene24300	182	T	C	S	h	h	c	c	h	c	h	a	a	a	a	h	h	a	h	h	h	c	h	h	h	h	a	c	a	h	a	h	h	a	h	a	h	a	h	c	c	a	a	c	h	h	h
chr8	AC8B0230	Unigene20175	219	G	T	S	h	h	c	c	h	c	h	a	a	a	a	h	h	a	h	h	h	c	h	h	h	h	a	c	a	a	a	h	h	a	h	a	h	a	h	c	c	a	a	c	h	h	h
chr8	AC8B0240	CL6479.Contig1	185	A	G	S	h	h	c	c	h	c	h	a	a	a	a	h	h	a	h	h	h	c	h	h	h	h	a	c	a	a	a	h	h	a	h	a	h	a	h	c	c	a	a	c	h	h	h
chr8	AC8B0240	Unigene4131	114	G	T	S	h	h	c	c	h	c	h	a	a	a	a	h	h	a	h	h	h	c	h	h	h	h	a	c	a	a	a	h	h	a	h	a	h	a	h	c	c	a	a	c	h	h	h
chr8	AC8B0250	CL2119.Contig1	944	A	G	S	h	h	c	c	h	c	a	a	a	h	a	h	h	a	h	h	h	c	h	h	h	h	a	c	a	a	a	h	h	a	h	a	h	a	h	c	c	a	a	c	h	h	h
chr8	AC8B0250	Unigene23795	475	C	T	S	h	h	c	c	h	c	h	a	a	h	a	h	h	a	h	h	h	c	h	h	h	h	a	c	a	a	a	h	h	a	h	a	h	a	h	c	c	a	a	c	h	h	h
chr8	AC8B0250	Unigene7727	1491	A	G	S	h	h	c	c	h	c	h	a	a	h	a	h	h	a	h	h	h	c	h	h	h	h	a	c	a	a	a	h	h	a	h	a	h	a	h	c	c	a	a	c	h	h	h
chr8	AC8B0250	Unigene28096	393	T	A	S	h	h	c	c	h	c	h	a	a	h	a	h	h	a	h	h	h	c	h	h	h	h	a	c	a	a	a	h	h	a	h	a	h	a	h	c	c	a	a	c	h	h	h
chr8	AC8B0260	CL1011.Contig2	33	C	T	S	h	h	c	h	h	c	h	h	a	h	a	h	h	a	h	h	h	c	h	h	h	h	a	c	a	a	a	h	h	a	h	a	h	a	h	c	c	a	a	c	h	h	h
chr8	AC8B0270	CL771.Contig1	1054	T	C	S	h	h	c	h	h	c	h	h	a	c	a	h	h	a	h	h	h	c	h	h	h	h	a	c	a	a	a	h	h	a	h	a	h	a	h	c	c	a	a	c	h	h	h
chr8	AC8B0270	Unigene17027	61	T	A	S	h	h	c	h	h	c	h	h	a	c	a	h	h	a	h	h	h	c	h	h	h	h	a	c	a	a	a	h	h	a	h	a	h	a	h	c	c	a	a	c	h	h	h
chr8	AC8B0280	CL7063.Contig1	1836	T	C	S	h	h	c	h	h	c	h	h	a	c	a	h	h	a	a	h	h	c	h	h	h	h	a	c	a	a	a	h	h	a	h	a	h	a	h	c	c	a	a	c	h	h	h
chr8	AC8B0290	Unigene22995	87	A	G	S	h	h	c	h	h	c	h	h	a	c	a	h	h	a	a	h	h	c	c	h	h	h	a	c	a	a	a	h	h	a	h	a	h	a	h	c	c	a	a	c	h	h	h
chr8	AC8B0290	Unigene28902	489	G	A	S	h	h	c	h	h	c	h	h	a	c	a	h	h	a	a	h	h	c	c	h	h	h	a	c	a	a	a	h	h	a	h	a	h	a	h	c	c	a	a	c	h	h	h
chr8	AC8B0290	Unigene3254	278	A	G	S	h	h	c	h	h	c	h	h	a	c	a	h	h	a	a	h	h	c	c	h	h	h	a	c	a	a	a	h	h	a	h	a	h	a	h	c	c	a	a	c	h	h	h
chr8	AC8B0300	Unigene31129	157	C	T	S	h	h	c	h	h	c	h	h	a	c	a	h	h	a	a	h	h	c	c	h	h	h	a	c	a	a	a	h	h	a	h	a	h	a	h	c	c	a	h	c	h	h	h
chr8	AC8B0310	Unigene28368	233	G	C	S	h	h	c	a	h	c	h	h	a	c	a	h	h	a	a	h	h	c	c	h	h	h	a	c	a	a	a	h	h	a	h	a	h	a	h	c	c	a	c	c	h	h	h
chr8	AC8B0320	CL4161.Contig2	412	G	A	S	h	h	c	a	h	c	h	h	a	c	a	h	h	a	a	h	h	c	c	h	h	h	a	c	a	a	h	h	h	a	h	a	h	a	h	c	c	a	c	h	h	h	h
chr8	AC8B0320	Unigene21815	414	C	T	S	h	h	c	a	h	c	h	h	a	c	a	h	h	a	a	h	h	c	c	h	h	h	a	c	a	a	h	h	h	a	h	a	h	a	h	c	c	a	c	h	h	h	h
chr8	AC8B0320	Unigene28012	325	A	C	S	h	h	c	a	h	c	h	h	a	c	a	h	h	a	a	h	h	c	c	h	h	h	a	c	a	a	h	h	h	a	h	a	h	a	h	c	c	a	c	h	h	h	h
chr8	AC8B0320	Unigene5044	49	C	T	S	h	h	c	a	h	c	h	h	a	c	a	h	h	a	a	h	h	c	c	h	h	h	a	c	a	a	h	h	h	a	h	a	h	a	h	c	c	a	c	h	h	h	h
chr8	AC8B0330	Unigene159	625	T	C	S	h	h	c	a	h	c	h	h	a	c	a	h	h	a	a	h	h	c	c	h	h	h	a	c	a	a	h	h	h	a	h	a	h	a	h	c	c	a	c	h	h	h	h
chr8	AC8B0340	CL5962.Contig1	469	C	T	S	h	h	c	a	h	c	h	h	a	c	a	h	h	a	a	h	h	c	c	h	h	h	a	c	a	a	h	h	h	a	h	a	h	a	h	c	c	a	c	h	h	h	h
chr8	AC8B0350	CL2944.Contig1	288	C	T	S	h	h	c	a	h	c	h	h	a	c	a	h	h	a	a	h	h	h	c	h	h	h	a	c	a	a	h	h	h	a	h	a	h	a	h	c	c	a	c	h	h	h	h
chr8	AC8B0360	Unigene21884	132	T	C	S	h	h	c	a	h	c	h	h	a	c	a	h	h	a	a	h	h	h	c	h	h	h	a	c	a	a	h	h	h	a	h	a	h	a	h	h	c	a	c	h	h	h	h
chr8	AC8B0360	Unigene27357	521	C	T	S	h	h	c	a	h	c	h	h	a	c	a	h	h	a	a	h	h	h	c	h	h	h	a	c	a	a	h	h	h	a	h	a	h	a	h	h	c	a	c	h	h	h	h
chr8	AC8B0360	Unigene27505	150	C	T	S	h	h	c	a	h	c	h	h	a	c	a	h	h	a	a	h	h	h	c	h	h	h	a	c	a	a	h	h	h	a	h	a	h	a	h	h	c	a	c	h	h	h	h
chr8	AC8B0360	Unigene9389	232	A	T	S	h	h	c	a	h	c	h	h	a	c	a	h	h	a	a	h	h	h	c	h	h	h	a	c	a	a	h	h	h	a	h	a	h	a	h	h	c	a	c	h	h	h	h
chr8	AC8B0370	CL5440.Contig1	224	A	C	S	h	h	c	a	h	c	h	h	a	c	a	c	h	a	a	h	h	h	c	h	h	h	a	c	a	a	h	h	h	a	h	a	h	h	h	h	c	a	c	h	h	h	h
chr8	AC8B0370	Unigene27766	1228	A	G	S	h	h	c	a	h	c	h	h	a	c	a	c	h	a	a	h	h	h	c	h	h	h	a	c	a	a	h	h	h	a	h	a	h	h	h	h	c	a	c	h	h	h	h
chr8	AC8B0380	CL2685.Contig2	307	T	C	S	h	h	c	a	h	c	h	h	a	c	a	c	h	a	a	h	h	h	c	h	h	h	a	c	a	a	h	h	h	a	h	a	h	h	h	h	c	a	c	h	h	h	h
chr8	AC8B0380	Unigene27627	1553	G	T	S	h	h	c	a	h	c	h	h	a	c	a	c	h	a	a	h	h	h	c	h	h	h	a	c	a	a	h	h	h	a	h	a	h	h	h	h	c	a	c	h	h	h	h
chr8	AC8B0390	CL639.Contig7	769	C	T	S	h	h	c	a	h	c	h	h	a	c	a	c	h	a	a	h	h	h	c	h	h	h	a	c	a	a	h	h	h	a	h	a	h	h	h	h	c	a	c	h	h	h	h
chr8	AC8B0400	Unigene20369	222	C	T	S	h	h	c	a	h	c	h	h	a	c	a	c	h	a	a	h	h	h	c	h	h	h	a	c	a	a	h	h	h	a	h	a	h	h	h	h	c	a	c	h	h	h	h
chr8	AC8B0410	Unigene10656	214	A	C	S	h	h	c	a	h	c	h	h	a	c	a	c	h	a	a	h	h	h	c	h	h	h	a	c	a	a	h	h	h	a	h	a	h	h	h	h	c	a	c	h	h	c	h
chr8	AC8B0410	Unigene10885	450	A	G	S	h	h	c	a	h	c	h	h	a	c	a	c	h	a	a	h	h	h	c	h	h	h	a	c	a	a	h	h	h	a	h	a	h	h	h	h	c	a	c	h	h	c	h
chr8	AC8B0410	Unigene11912	378	C	T	S	h	h	c	a	h	c	h	h	a	c	a	c	h	a	a	h	h	h	c	h	h	h	a	c	a	a	h	h	h	a	h	a	h	h	h	h	c	a	c	h	h	c	h
chr8	AC8B0410	Unigene12322	1229	A	G	S	h	h	c	a	h	c	h	h	a	c	a	c	h	a	a	h	h	h	c	h	h	h	a	c	a	a	h	h	h	a	h	a	h	h	h	h	c	a	c	h	h	c	h
chr8	AC8B0420	Unigene27649	151	G	A	S	h	h	c	a	h	c	h	h	a	c	a	c	h	a	a	h	h	h	c	h	h	h	a	h	a	a	h	h	h	a	h	a	a	h	h	h	h	a	c	h	h	c	h
chr8	AC8B0420	Unigene9750	264	C	A	S	h	h	c	a	h	c	h	h	a	c	a	c	h	a	a	h	h	h	c	h	h	h	a	h	a	a	h	h	h	a	h	a	a	h	h	h	h	a	c	h	h	c	h
chr8	AC8B0430	Unigene8029	223	C	T	S	h	h	c	a	h	c	h	h	a	c	a	h	h	a	a	h	h	h	c	h	h	h	a	h	a	a	h	h	h	a	h	a	a	h	h	h	h	a	c	h	h	c	h
chr8	AC8B0430	Unigene8261	911	A	T	S	h	h	c	a	h	c	h	h	a	c	a	h	h	a	a	h	h	h	c	h	h	h	a	h	a	a	h	h	h	a	h	a	a	h	h	h	h	a	c	h	h	c	h
chr8	AC8B0440	CL4523.Contig1	356	T	G	S	h	h	c	a	h	c	h	h	a	c	a	h	h	a	a	h	h	h	c	h	h	h	a	h	a	a	h	h	h	a	h	a	a	h	h	h	h	a	c	h	h	c	h
chr8	AC8B0450	Unigene27226	192	A	G	S	h	h	c	a	h	c	h	h	a	c	a	h	h	a	a	h	h	h	c	h	h	h	a	h	a	a	h	h	c	a	h	a	a	h	h	h	h	a	c	h	h	c	h
chr8	AC8B0450	Unigene7888	185	C	G	S	h	h	c	a	h	c	h	h	a	c	a	h	h	a	a	h	h	h	c	h	h	h	a	h	a	a	h	h	c	a	h	a	a	h	h	h	h	a	c	h	h	c	h
chr8	AC8B0450	Unigene9935	276	C	T	S	h	h	c	a	h	c	h	h	a	c	a	h	h	a	a	h	h	h	c	h	h	h	a	h	a	a	h	h	c	a	h	a	a	h	h	h	h	a	c	h	h	c	h
chr8	AC8B0460	CL4165.Contig1	823	G	A	S	h	h	c	a	a	c	h	h	a	c	a	h	h	a	a	h	h	h	c	h	h	h	a	h	a	a	h	h	c	a	h	a	a	h	c	h	h	a	c	h	h	c	h
chr8	AC8B0460	CL4772.Contig1	198	T	C	S	h	h	c	a	a	c	h	h	a	c	a	h	h	a	a	h	h	h	c	h	h	h	a	h	a	a	h	h	c	a	h	a	a	h	c	h	h	a	c	h	h	c	h
chr8	AC8B0460	Unigene15759	71	G	A	S	h	h	c	a	a	c	h	h	a	c	a	h	h	a	a	h	h	h	c	h	h	h	a	h	a	a	h	h	c	a	h	a	a	h	c	h	h	a	c	h	h	c	h
chr8	AC8B0470	Unigene23432	1322	G	C	S	h	h	c	a	a	c	h	h	a	c	a	h	h	h	a	h	h	h	c	h	h	h	a	h	a	a	h	h	c	a	h	a	a	h	c	h	h	h	c	h	h	c	h
chr8	AC8B0470	Unigene24999	178	T	A	S	h	h	c	a	a	c	h	h	a	c	a	h	h	h	a	h	h	h	c	h	h	h	a	h	a	a	h	h	c	a	h	a	a	h	c	h	h	h	c	h	h	c	h
chr8	AC8B0470	Unigene28066	1450	G	A	S	h	h	c	a	a	c	h	h	a	c	a	h	h	h	a	h	h	h	c	h	h	h	a	h	a	a	h	h	c	a	h	a	a	h	c	h	h	h	c	h	h	c	h
chr8	AC8B0480	Unigene7937	172	C	T	S	h	h	c	a	a	c	h	h	a	c	a	h	h	h	a	h	h	h	c	h	h	h	a	h	a	h	h	h	c	a	h	a	a	h	c	h	h	h	c	h	h	c	h
chr8	AC8B0490	Unigene13838	419	T	C	S	h	h	c	a	a	c	h	h	h	c	h	h	h	h	a	h	h	h	c	h	h	h	a	h	a	h	h	h	c	a	h	a	a	h	c	h	h	h	c	h	h	c	h
chr8	AC8B0500	Unigene23322	155	G	A	S	h	h	c	a	a	c	h	h	h	c	h	h	h	h	a	h	h	h	c	h	h	h	a	h	a	h	h	h	c	a	h	a	a	h	c	h	h	h	c	h	h	c	h
chr8	AC8B0500	Unigene7600	43	T	C	S	h	h	c	a	a	c	h	h	h	c	h	h	h	h	a	h	h	h	c	h	h	h	a	h	a	h	h	h	c	a	h	a	a	h	c	h	h	h	c	h	h	c	h
chr8	AC8B0510	Unigene27438	920	C	T	S	h	h	c	a	a	c	h	h	h	c	h	h	h	c	a	h	h	h	c	h	h	h	a	h	a	h	h	h	c	a	h	a	a	h	c	h	h	h	c	h	h	c	h
[truncated: 53 more columns]
