# Supplementary material for: Construction of an ultrahigh-density linkage map and graphical representation of the arrangement of transcriptome-based unigene markers on the chromosomes of Allium cepa L.
Source: Research Square preprint supplement (doi:10.21203/rs.3.rs-114354/v1), 2020-12-01
Supplement: Supplementary file 2 [file a109ce766802f21cf3b5c1b8.xlsx]

## Sheet: Sheet1
Supplemental Table S2. Comparison of SNP marker posions on corresponding seuences in two transcriptome based SNP marker analyses
Unigene	chr	Genotype_block	LG	cM	Locus	Query
Unigene29157	chr1	AC1B0070	1	0	i39194_488	isotig39194_488_869_488_25_A_76.9_G_91.7
Unigene28350	chr1	AC1B0100	1	8.7	i34152_369	isotig34152_369_1389_369_75_A_100_G_94.9
Unigene32222	chr1	AC1B0100	1	10.9	i20926_388	isotig20926_388_1653_388_18_T_100_A_92.9
Unigene12020	chr1	AC1B0190	1	29.9	i31517_1616	isotig31517_1616_1827_1616_22_T_100_G_100
Unigene13501	chr1	AC1B0200	1	44.3	i28682_2145	isotig28682_2145_3146_2145_46_G_100_A_96.3
Unigene25691	chr1	AC1B0350	1	57.9	i30515_1420	isotig30515_1420_2083_1420_19_G_100_A_100
Unigene28031	chr1	AC1B0440	1	59	i37206_320	isotig37206_320_1048_320_34_G_100_T_100
Unigene29151	chr1	AC1B0540	1	65.5	i31077_1018	isotig31077_1018_1923_1018_54_A_100_G_100
Unigene6670	chr1	AC1B0640	1	90.9	i25335_1223	isotig25335_1223_2588_1223_28_C_94.1_T_100
Unigene28592	chr1	AC1B0640	1	101.9	i36532_752	isotig36532_752_1109_752_48_C_100_T_82.8
CL1235.Contig1	chr1	AC1B0680	1	104.2	i32235_1123	isotig32235_1123_1686_1123_45_C_100_T_100
Unigene27619	chr1	AC1B0690	1	119	i39274_732	isotig39274_732_866_732_19_A_87.5_G_100
Unigene21677	chr1	AC1B0910	1	155.4	i28777_484	isotig28777_484_3022_484_55_G_97.6_A_100
Unigene11284	chr1	AC1B0980	1	162.9	i31626_574	isotig31626_574_1802_574_70_A_100_T_92.7
Unigene30668	chr2	AC2B0690	2	0	i40509_271	isotig40509_271_779_271_10_C_100_T_100
Unigene5345	chr2	AC2B0680	2	0	i27223_722	isotig27223_722_1043_722_35_G_100_C_96.3
Unigene27210	chr2	AC2B0660	2	13.2	i27567_733	isotig27567_733_947_733_73_A_100_G_98.2
Unigene28522	chr2	AC2B0660	2	14.9	i41606_421	isotig41606_421_716_421_17_A_100_G_100
Unigene23405	chr2	AC2B0650	2	14.9	i29603_232	isotig29603_232_2432_232_33_A_96_T_100
Unigene25553	chr2	AC2B0640	2	47.3	i30461_1472	isotig30461_1472_2103_1472_49_C_100_T_75
CL3964.Contig1	chr2	AC2B0630	2	54.3	i38139_314	isotig38139_314_956_314_21_A_100_C_100
Unigene35653	chr2	AC2B0600	2	56.6	i30026_1731	isotig30026_1731_2246_1731_15_G_100_T_91.7
Unigene12125	chr2	AC2B0510	2	96	i36775_363	isotig36775_363_1086_363_12_A_80_G_100
CL6377.Contig1	chr2	AC2B0430	2	141.9	i28284_1005	isotig28284_1005_4256_1005_46_C_100_T_79.2
CL1286.Contig1	chr2	AC2B0380	2	143.6	i31965_1307	isotig31965_1307_1734_1307_76_C_100_T_97.7
CL6457.Contig1	chr2	AC2B0330	2	147.5	i28524_1455	isotig28524_1455_3371_1455_25_G_100_A_100
Unigene27326	chr2	AC2B0230	2	161.9	i31903_989	isotig31903_989_1746_989_97_G_100_A_93.2
CL6739.Contig2	chr2	AC2B0210	2	161.9	i12268_1682	isotig12268_1682_2010_1682_7_G_100_A_100
Unigene26127	chr2	AC2B0240	2	175.1	i31878_315	isotig31878_315_1753_315_30_C_75_T_88.9
Unigene12469	chr2	AC2B0200	2	193.2	i32865_1404	isotig32865_1404_1584_1404_15_G_100_T_77.8
Unigene18600	chr2	AC2B0120	2	204.6	i36002_905	isotig36002_905_1167_905_18_C_100_G_85.7
CL5148.Contig1	chr2	AC2B0070	2	215.6	i31661_1304	isotig31661_1304_1798_1304_58_G_100_C_100
Unigene13879	chr2	AC2B0060	2	217.9	i35211_728	isotig35211_728_1257_728_22_A_100_G_94.1
Unigene32079	chr2	AC2B0020	2	226.5	i36165_116	isotig36165_116_1146_116_23_G_100_A_92.3
Unigene29180	chr3	AC3B0870	3	4	i40425_522	isotig40425_522_785_522_16_C_100_T_100
Unigene28170	chr3	AC3B0860	3	12.7	i39498_201	isotig39498_201_849_201_12_G_100_A_100
Unigene22623	chr3	AC3B0820	3	12.7	i33783_1096	isotig33783_1096_1444_1096_31_C_92.3_A_77.8
Unigene9529	chr3	AC3B0820	3	12.7	i28424_1060	isotig28424_1060_3543_1060_53_G_100_A_95.2
Unigene31771	chr3	AC3B0800	3	13.3	i35170_582	isotig35170_582_1260_582_23_A_100_C_100
Unigene12038	chr3	AC3B0770	3	13.3	i34021_1046	isotig34021_1046_1401_1046_65_C_100_G_89.6
CL3087.Contig2	chr3	AC3B0750	3	13.8	i29611_2140	isotig29611_2140_2429_2140_22_A_100_C_92.9
Unigene4017	chr3	AC3B0730	3	23.5	i35322_1054	isotig35322_1054_1245_1054_19_T_100_G_100
CL3294.Contig1	chr3	AC3B0720	3	23.5	i31015_812	isotig31015_812_1929_812_47_T_93.9_C_78.6
Unigene27878	chr3	AC3B0620	3	50.7	i42601_189	isotig42601_189_657_189_18_A_100_G_92.9
CL4565.Contig2	chr3	AC3B0530	3	73.2	i28294_3702	isotig28294_3702_4089_3702_29_C_81.8_A_83.3
Unigene25156	chr3	AC3B0550	3	99.3	i33166_330	isotig33166_330_1536_330_12_G_100_C_87.5
Unigene13782	chr3	AC3B0330	3	115	i33909_1031	isotig33909_1031_1424_1031_44_C_94.4_T_100
Unigene27294	chr3	AC3B0310	3	116.1	i39206_422	isotig39206_422_867_422_9_C_100_T_100
Unigene10250	chr3	AC3B0280	3	118.9	i39258_399	isotig39258_399_869_399_19_A_100_C_100
Unigene9938	chr3	AC3B0250	3	119.4	i42494_328	isotig42494_328_665_328_23_T_100_A_100
CL6764.Contig1	chr3	AC3B0240	3	123.3	i30352_1460	isotig30352_1460_2123_1460_58_C_100_G_100
Unigene10337	chr3	AC3B0230	3	129.6	i34830_369	isotig34830_369_1304_369_30_T_100_C_100
Unigene7077	chr3	AC3B0220	3	130.1	i30865_1200	isotig30865_1200_1975_1200_40_T_100_C_94.1
Unigene10312	chr3	AC3B0220	3	130.7	i31710_474	isotig31710_474_1782_474_27_T_100_C_100
CL1582.Contig1	chr3	AC3B0210	3	143.6	i27896_600	isotig27896_600_872_600_40_A_100_G_100
Unigene6717	chr3	AC3B0210	3	154	i30363_1184	isotig30363_1184_2120_1184_28_C_95.5_T_100
Unigene4753	chr3	AC3B0180	3	163	i35214_301	isotig35214_301_1254_301_54_A_100_G_100
CL2913.Contig1	chr3	AC3B0160	3	174	i25093_2627	isotig25093_2627_3400_2627_8_C_100_T_100
Unigene9166	chr3	AC3B0060	3	180.4	i28607_1011	isotig28607_1011_3242_1011_44_A_100_G_100
CL2508.Contig2	chr3	AC3B0040	3	185.4	i27361_1127	isotig27361_1127_1962_1127_77_T_100_C_100
Unigene28183	chr3	AC3B0030	3	189.4	i42169_329	isotig42169_329_683_329_15_C_100_T_100
Unigene1033	chr3	AC3B0020	3	191.7	i32949_1292	isotig32949_1292_1569_1292_50_C_100_T_100
Unigene19814	chr3	AC3B0020	3	192.2	i33627_701	isotig33627_701_1463_701_18_T_100_C_100
Unigene11894	chr3	AC3B0010	3	195.1	i32390_1451	isotig32390_1451_1659_1451_27_T_100_G_88.9
CL4025.Contig1	chr4	AC4B0130	4A	4.9	i31622_435	isotig31622_435_1800_435_33_G_100_A_92.6
Unigene34056	chr4	AC4B0150	4A	17.3	i38604_268	isotig38604_268_919_268_17_A_100_G_80
CL3088.Contig1	chr4	AC4B0160	4A	28.3	i26442_1225	isotig26442_1225_1597_1225_48_C_100_T_81.5
Unigene34351	chr4	AC4B0180	4A	40	i19902_1078	isotig19902_1078_1731_1078_22_T_100_C_85.7
Unigene24359	chr4	AC4B0070	4B	5.6	i29719_588	isotig29719_588_2372_588_10_G_100_C_100
Unigene13261	chr4	AC4B0100	4B	9	i31588_1120	isotig31588_1120_1810_1120_46_C_100_T_92.3
Unigene27543	chr4	AC4B0320	4B	32.4	i37158_542	isotig37158_542_1052_542_42_T_100_G_89.7
Unigene24647	chr4	AC4B0430	4B	47.9	i28612_1057	isotig28612_1057_3235_1057_39_G_100_A_100
Unigene14034	chr4	AC4B0450	4B	63.5	i29778_1617	isotig29778_1617_2332_1617_72_C_100_G_97.9
CL927.Contig1	chr4	AC4B0480	4B	66.8	i19574_601	isotig19574_601_1865_601_32_G_100_A_100
Unigene8630	chr4	AC4B0520	4B	69.6	i44683_192	isotig44683_192_556_192_26_A_100_G_100
Unigene19927	chr4	AC4B0510	4B	79.3	i37385_830	isotig37385_830_1028_830_15_C_100_A_75
CL3565.Contig3	chr4	AC4B0540	4B	81.5	i26045_1046	isotig26045_1046_1731_1046_44_G_100_A_100
Unigene27664	chr4	AC4B0560	4B	83.7	i35268_1082	isotig35268_1082_1251_1082_13_C_100_T_87.5
Unigene28540	chr4	AC4B0570	4B	83.7	i34321_920	isotig34321_920_1366_920_15_T_100_C_100
Unigene28327	chr4	AC4B0670	4B	133.4	i41344_259	isotig41344_259_729_259_13_A_100_T_87.5
Unigene19716	chr4	AC4B0760	4B	155.8	i36793_769	isotig36793_769_1079_769_30_A_100_G_78.6
Unigene28309	chr4	AC4B0760	4B	155.8	i37821_673	isotig37821_673_989_673_28_A_100_G_88.9
CL7113.Contig2	chr5	AC5B0780	5	25.4	i33448_101	isotig33448_101_1493_101_10_A_100_C_100
CL3431.Contig3	chr5	AC5B0620	5	46.4	i31152_1676	isotig31152_1676_1905_1676_45_T_85.7_A_100
CL1094.Contig1	chr5	AC5B0610	5	49.8	c00142_122	contig00142_122_945_122_22_T_100_C_92.9
CL3057.Contig2	chr5	AC5B0570	5	57.3	i41364_140	isotig41364_140_731_140_20_C_80_T_100
Unigene7557	chr5	AC5B0510	5	59	i33680_1027	isotig33680_1027_1452_1027_86_T_100_C_97
Unigene7865	chr5	AC5B0510	5	59	i33430_179	isotig33430_179_1493_179_55_G_100_A_100
Unigene13461	chr5	AC5B0450	5	61.2	i25155_2372	isotig25155_2372_2911_2372_15_T_100_C_100
Unigene23063	chr5	AC5B0400	5	66.3	i28862_1166	isotig28862_1166_2940_1166_13_G_100_A_100
Unigene14114	chr5	AC5B0300	5	113.2	i28536_1567	isotig28536_1567_3342_1567_30_T_100_A_100
CL711.Contig2	chr5	AC5B0270	5	119.4	i29728_1131	isotig29728_1131_2368_1131_53_A_100_G_100
Unigene12458	chr5	AC5B0220	5	134.8	i26546_969	isotig26546_969_1492_969_50_A_92.3_G_91.7
Unigene13830	chr5	AC5B0160	5	150.1	i35535_407	isotig35535_407_1217_407_25_T_100_C_100
Unigene28383	chr5	AC5B0160	5	150.6	i33965_554	isotig33965_554_1414_554_46_G_94.1_A_100
CL6089.Contig1	chr5	AC5B0010	5	177.5	i32270_633	isotig32270_633_1683_633_31_G_100_C_83.3
CL656.Contig2	chr5	AC5B0060	5	178.6	i34113_654	isotig34113_654_1390_654_41_A_100_G_100
Unigene10200	chr5	AC5B0050	5	178.6	i30300_1048	isotig30300_1048_2151_1048_21_A_100_G_100
Unigene28393	chr5	AC5B0080	5	178.6	i43871_154	isotig43871_154_596_154_15_T_100_C_91.7
Unigene22891	chr6	AC6B0780	6A	9.3	i29703_1814	isotig29703_1814_2375_1814_47_T_100_C_82.8
Unigene24131	chr6	AC6B0450	6B	11	i33185_668	isotig33185_668_1529_668_59_C_100_T_100
Unigene29851	chr6	AC6B0440	6B	13.2	i37155_874	isotig37155_874_1047_874_14_A_100_G_100
Unigene12820	chr6	AC6B0390	6B	16.6	i31550_508	isotig31550_508_1821_508_33_A_94.7_G_100
Unigene27932	chr6	AC6B0300	6B	16.6	i31528_193	isotig31528_193_1826_193_12_T_100_C_100
Unigene10501	chr6	AC6B0290	6B	30.2	i30344_423	isotig30344_423_2128_423_20_T_100_G_100
Unigene13476	chr6	AC6B0290	6B	30.2	i35768_1013	isotig35768_1013_1188_1013_36_G_100_C_88.9
Unigene21542	chr6	AC6B0290	6B	30.2	i31280_1328	isotig31280_1328_1878_1328_17_A_100_G_85.7
Unigene24913	chr6	AC6B0290	6B	30.2	i29913_1032	isotig29913_1032_2282_1032_76_A_100_G_100
Unigene25148	chr6	AC6B0210	6B	38.2	i30657_853	isotig30657_853_2038_853_44_A_100_G_90.6
Unigene13813	chr6	AC6B0070	6B	40.4	i28726_1789	isotig28726_1789_3076_1789_63_C_100_T_100
Unigene24631	chr6	AC6B0080	6B	40.4	c00298_108	contig00298_108_1688_108_18_C_100_T_100
Unigene29239	chr6	AC6B0070	6B	40.4	i29123_1503	isotig29123_1503_2715_1503_17_A_100_G_100
Unigene3446	chr6	AC6B0060	6B	41	i32739_152	isotig32739_152_1605_152_25_A_100_G_100
Unigene27558	chr6	AC6B0040	6B	43.8	i42415_195	isotig42415_195_670_195_21_C_100_G_100
Unigene28192	chr6	AC6B0230	6B	53.6	i20970_1485	isotig20970_1485_1860_1485_136_G_98.1_A_85.7
Unigene9504	chr6	AC6B0240	6B	66	i29596_283	isotig29596_283_2438_283_34_G_100_A_77.8
Unigene13687	chr7	AC7B0500	7	39.1	i39918_357	isotig39918_357_818_357_18_C_100_T_93.3
CL6723.Contig1	chr7	AC7B0460	7	66.2	i40786_596	isotig40786_596_765_596_21_C_100_A_85.7
Unigene11564	chr7	AC7B0460	7	66.2	i28239_126	isotig28239_126_1143_126_57_T_100_A_98
Unigene24722	chr7	AC7B0460	7	83	i33385_293	isotig33385_293_1499_293_11_C_100_T_100
CL6639.Contig2	chr7	AC7B0450	7	84.7	i22582_277	isotig22582_277_838_277_28_G_100_A_94.4
Unigene19650	chr7	AC7B0420	7	88	i33720_952	isotig33720_952_1442_952_32_G_100_A_100
Unigene12920	chr7	AC7B0210	7	94.8	i28418_576	isotig28418_576_3557_576_72_A_96.8_G_80.5
Unigene12008	chr7	AC7B0160	7	96.4	i34666_385	isotig34666_385_1330_385_19_T_100_C_100
CL6036.Contig3	chr7	AC7B0130	7	102.1	i42387_377	isotig42387_377_673_377_18_G_100_C_100
CL1278.Contig2	chr7	AC7B0090	7	107.9	i34681_801	isotig34681_801_1319_801_84_G_100_A_98.5
Unigene6340	chr8	AC8B0430	8	9.1	i28911_1986	isotig28911_1986_2894_1986_15_G_100_A_100
Unigene11912	chr8	AC8B0410	8	16.5	i34070_1138	isotig34070_1138_1396_1138_23_G_81.8_A_100
Unigene12457	chr8	AC8B0360	8	54.1	i33439_640	isotig33439_640_1494_640_44_T_91.7_C_100
CL2944.Contig1	chr8	AC8B0350	8	55.4	i36797_307	isotig36797_307_1081_307_18_T_100_C_90
Unigene28012	chr8	AC8B0320	8	57.6	i41653_558	isotig41653_558_710_558_9_T_100_C_100
Unigene22995	chr8	AC8B0290	8	62.1	i32358_978	isotig32358_978_1668_978_126_A_100_C_88.4
Unigene28902	chr8	AC8B0290	8	62.1	i43294_202	isotig43294_202_625_202_16_C_100_T_92.3
Unigene10890	chr8	AC8B0270	8	62.7	i36139_442	isotig36139_442_1150_442_18_G_100_C_100
Unigene24300	chr8	AC8B0220	8	66.7	i29442_1107	isotig29442_1107_2516_1107_49_C_100_T_100
Unigene22490	chr8	AC8B0140	8	69.4	i28367_2185	isotig28367_2185_3722_2185_12_T_100_C_100
Unigene9585	chr8	AC8B0200	8	98.3	i28374_1764	isotig28374_1764_3679_1764_41_G_97_A_100
